# Supplementary material for: Identification of prognostic signatures of ferroptosis and autophagy-dependent lipid metabolism-related genes in hepatocellular carcinoma
Source: Research Square preprint supplement (doi:10.21203/rs.3.rs-6502562/v1), 2025-05-05

**Supplementary Figure 1** (A) The overlapped differentially expressed FRGs, ARGs and LMRGs in the training set. (B) Heatmap of the top 30 lipid metabolism-related differentially expressed genes in HCC. (C) Heatmap of the top 30 ferroptosis-related differentially expressed genes in HCC. (D) Heatmap of 27 autophagy-related differential genes in HCC.


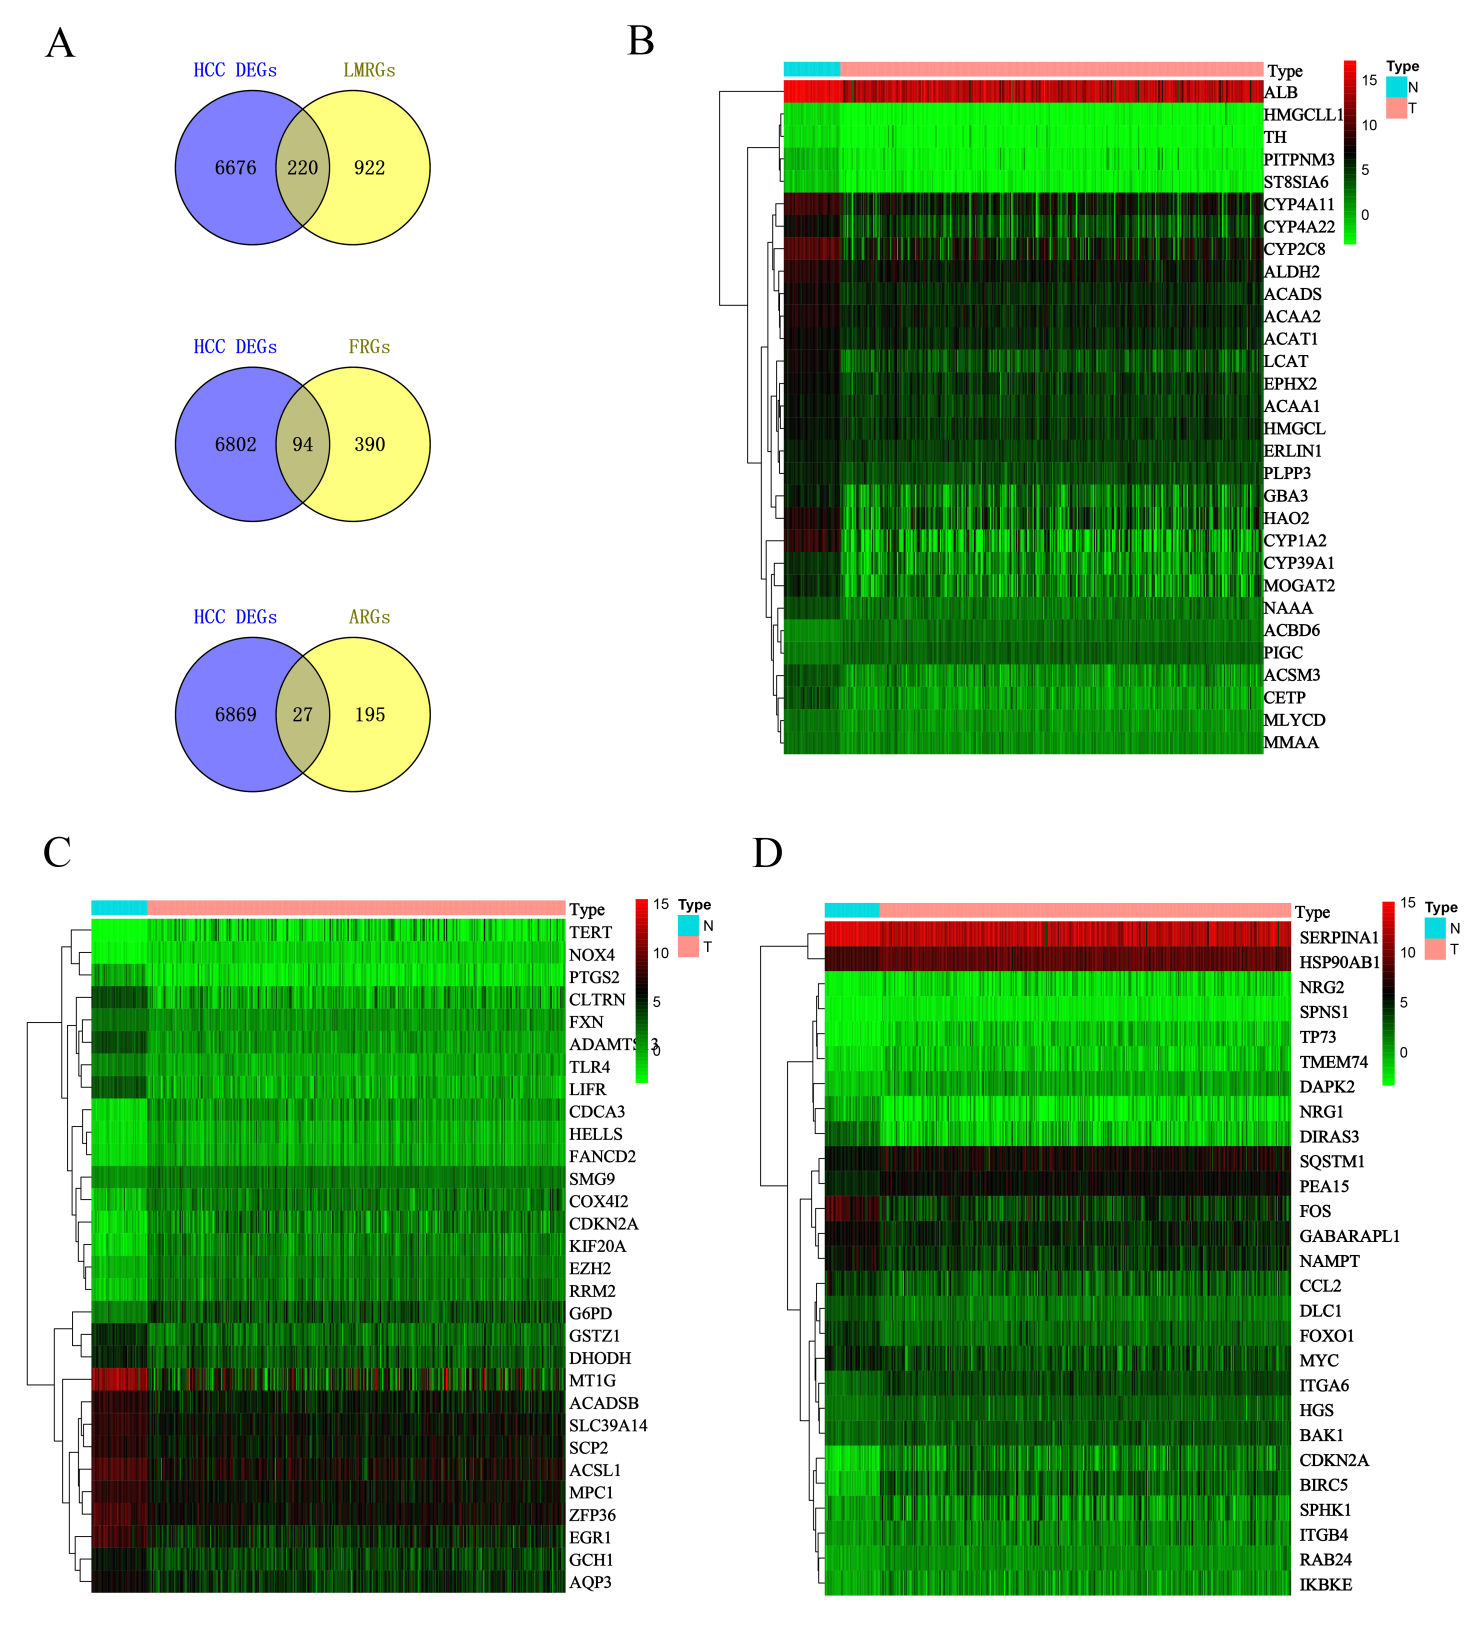


**Supplementary Figure 2** (A) PPI network of 56 Fer-Aut-LMRGs differential gene. (B) The hub genes of PPI network.

**
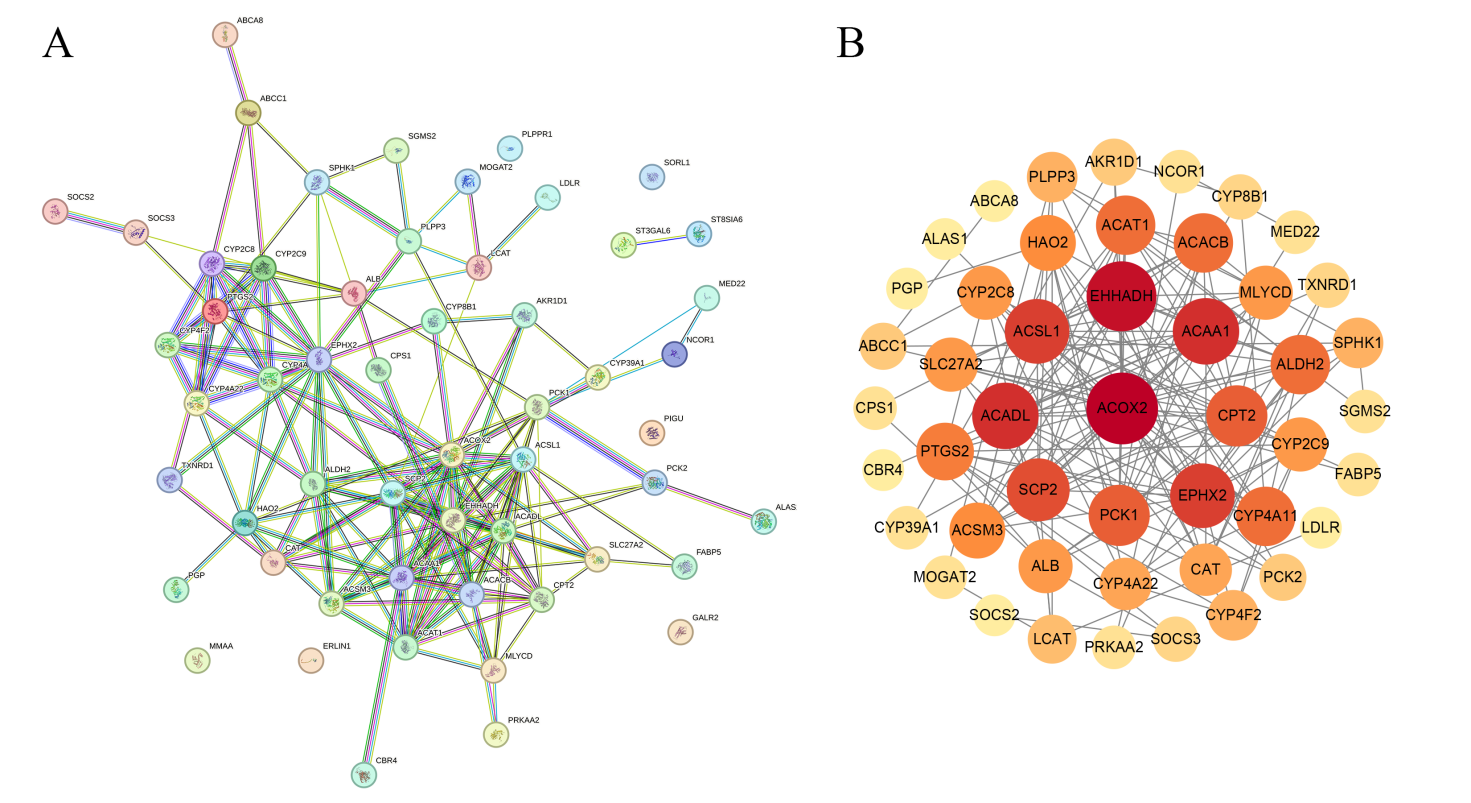
**

**Supplementary Figure 3** Identification of risk signature in the TCGA cohort. (A) Least absolute shrinkage and selection operator (LASSO) regression of the OS-related genes. (B) Cross-validation for tuning the parameter selection in the LASSO regression.


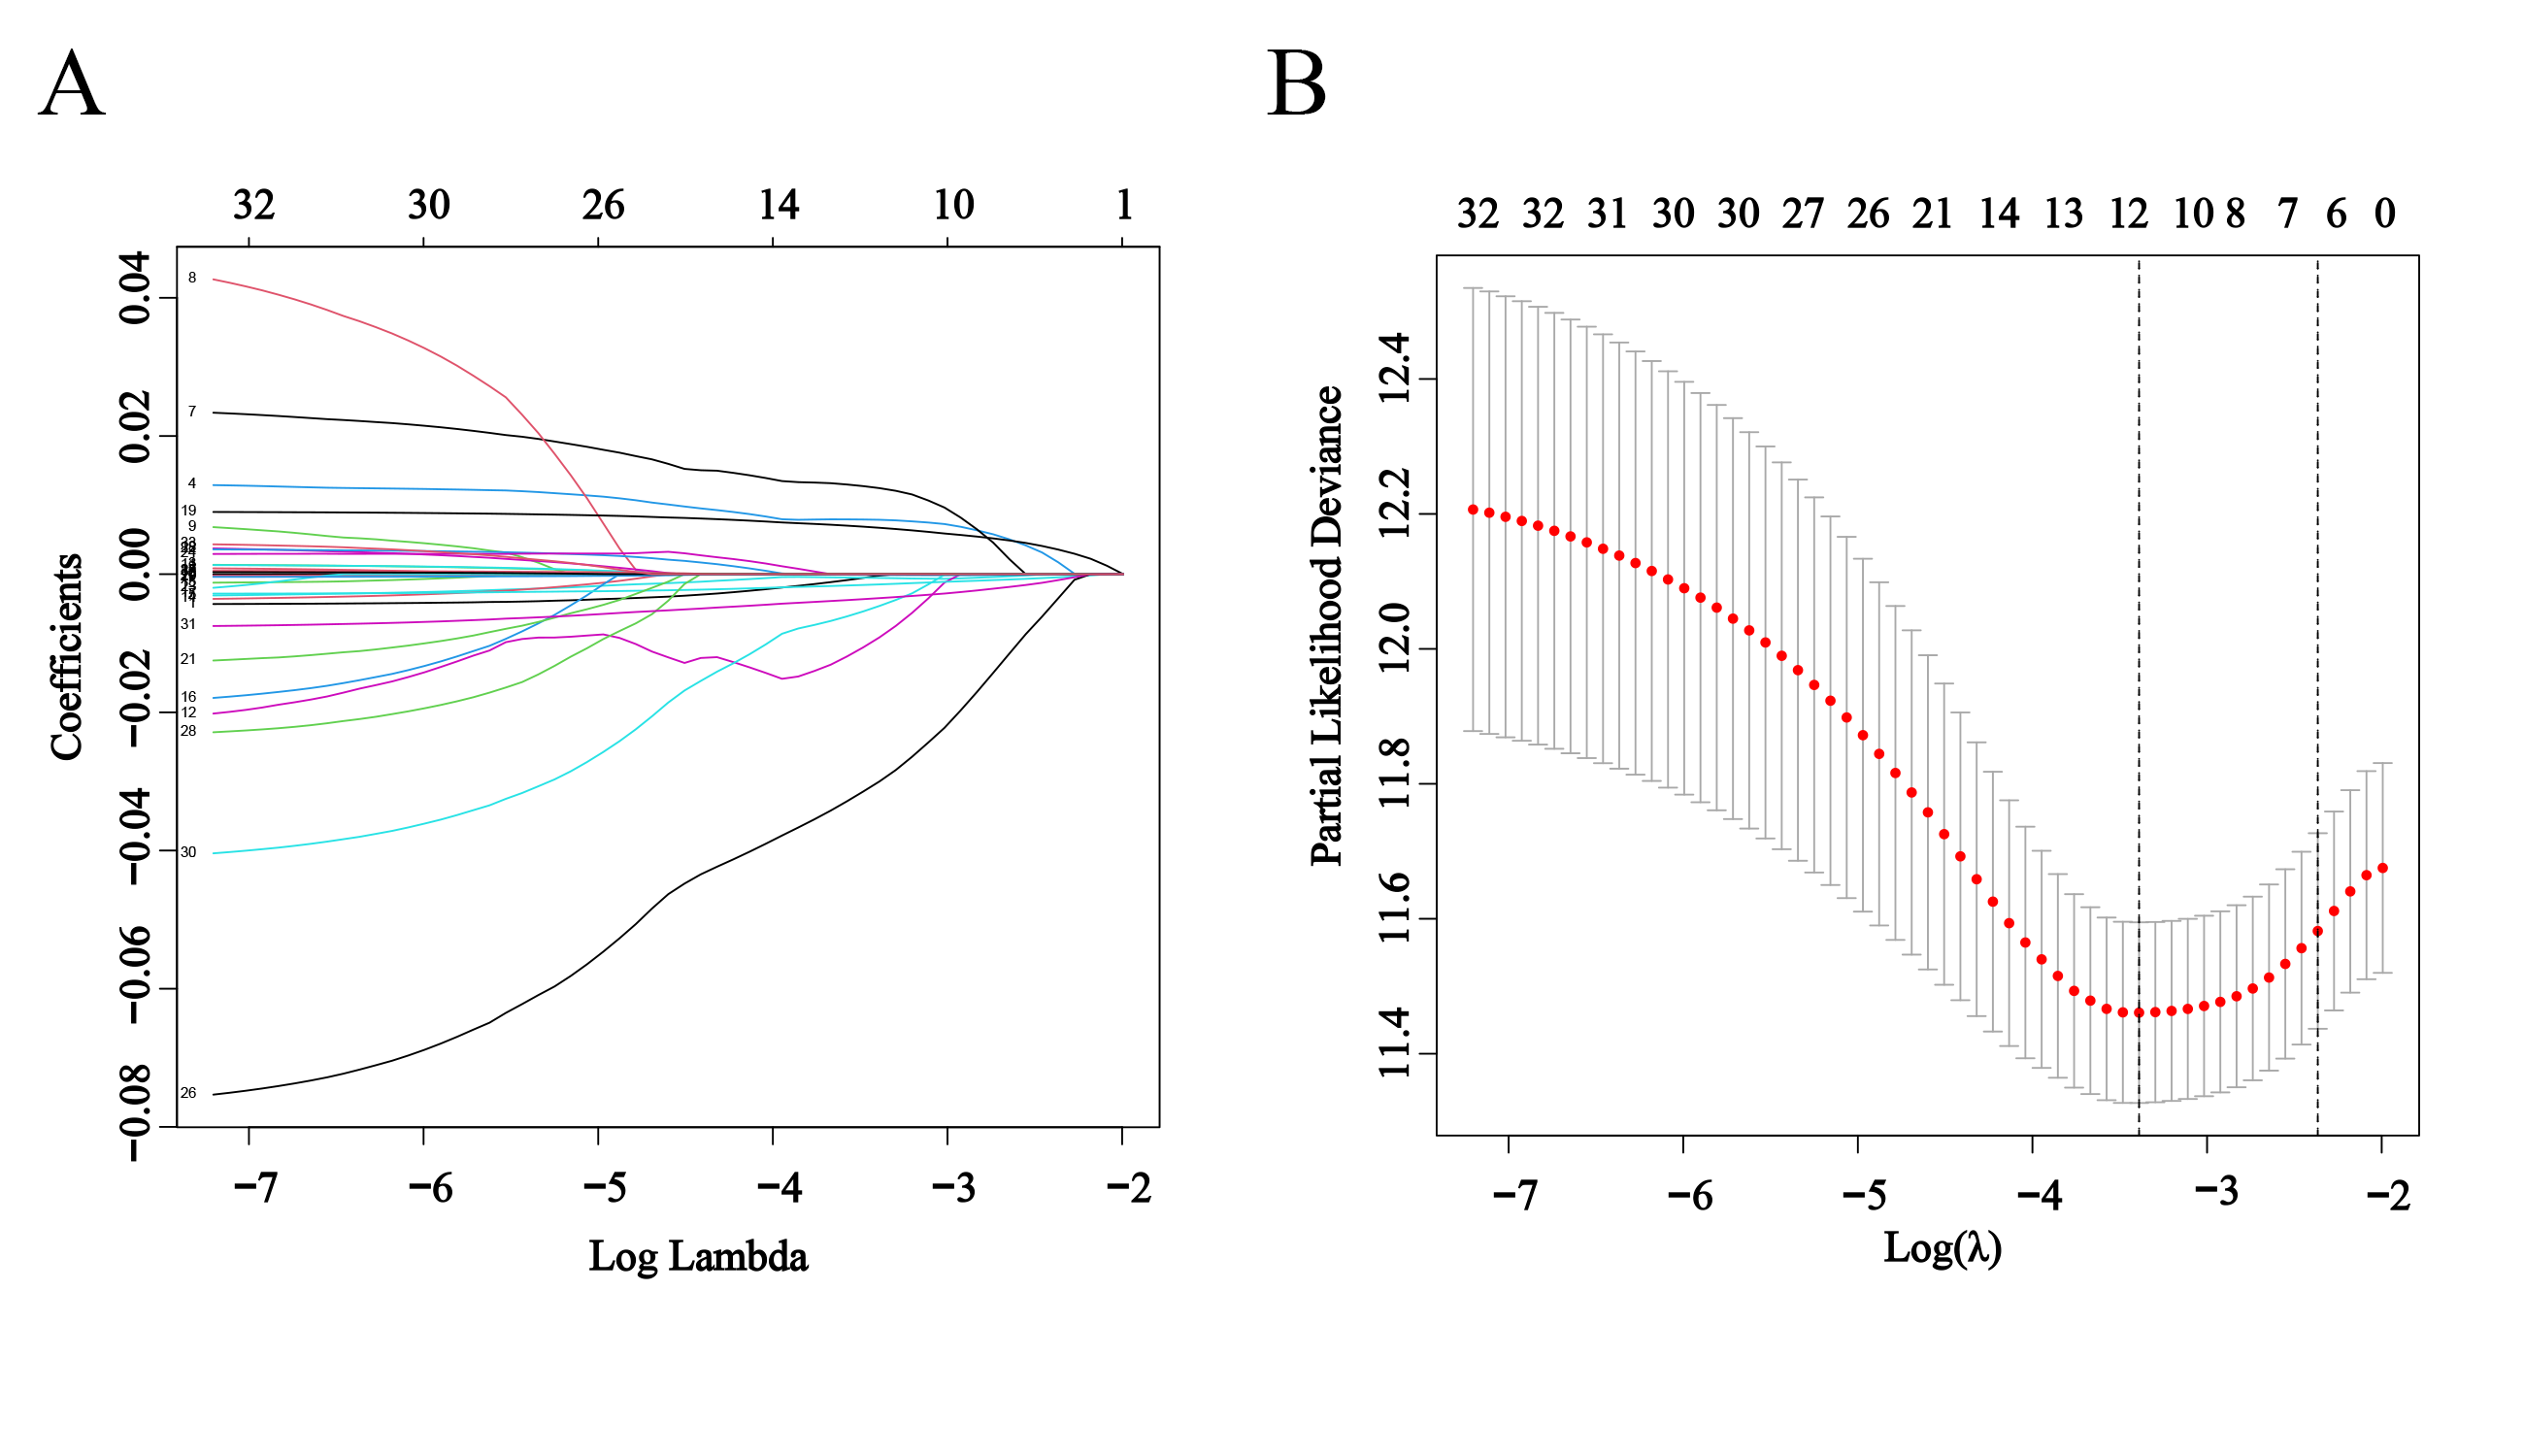


**Supplementary Figure 4** PCA analyzes the stratification ability of signature genes. (A) Lipid metabolism‐related signature genes. (B) 56 differentially expressed Fer-Aut-LMRGs. (C) 220 differentially expressed lipid metabolic genes. (D) All gene expression profiles.


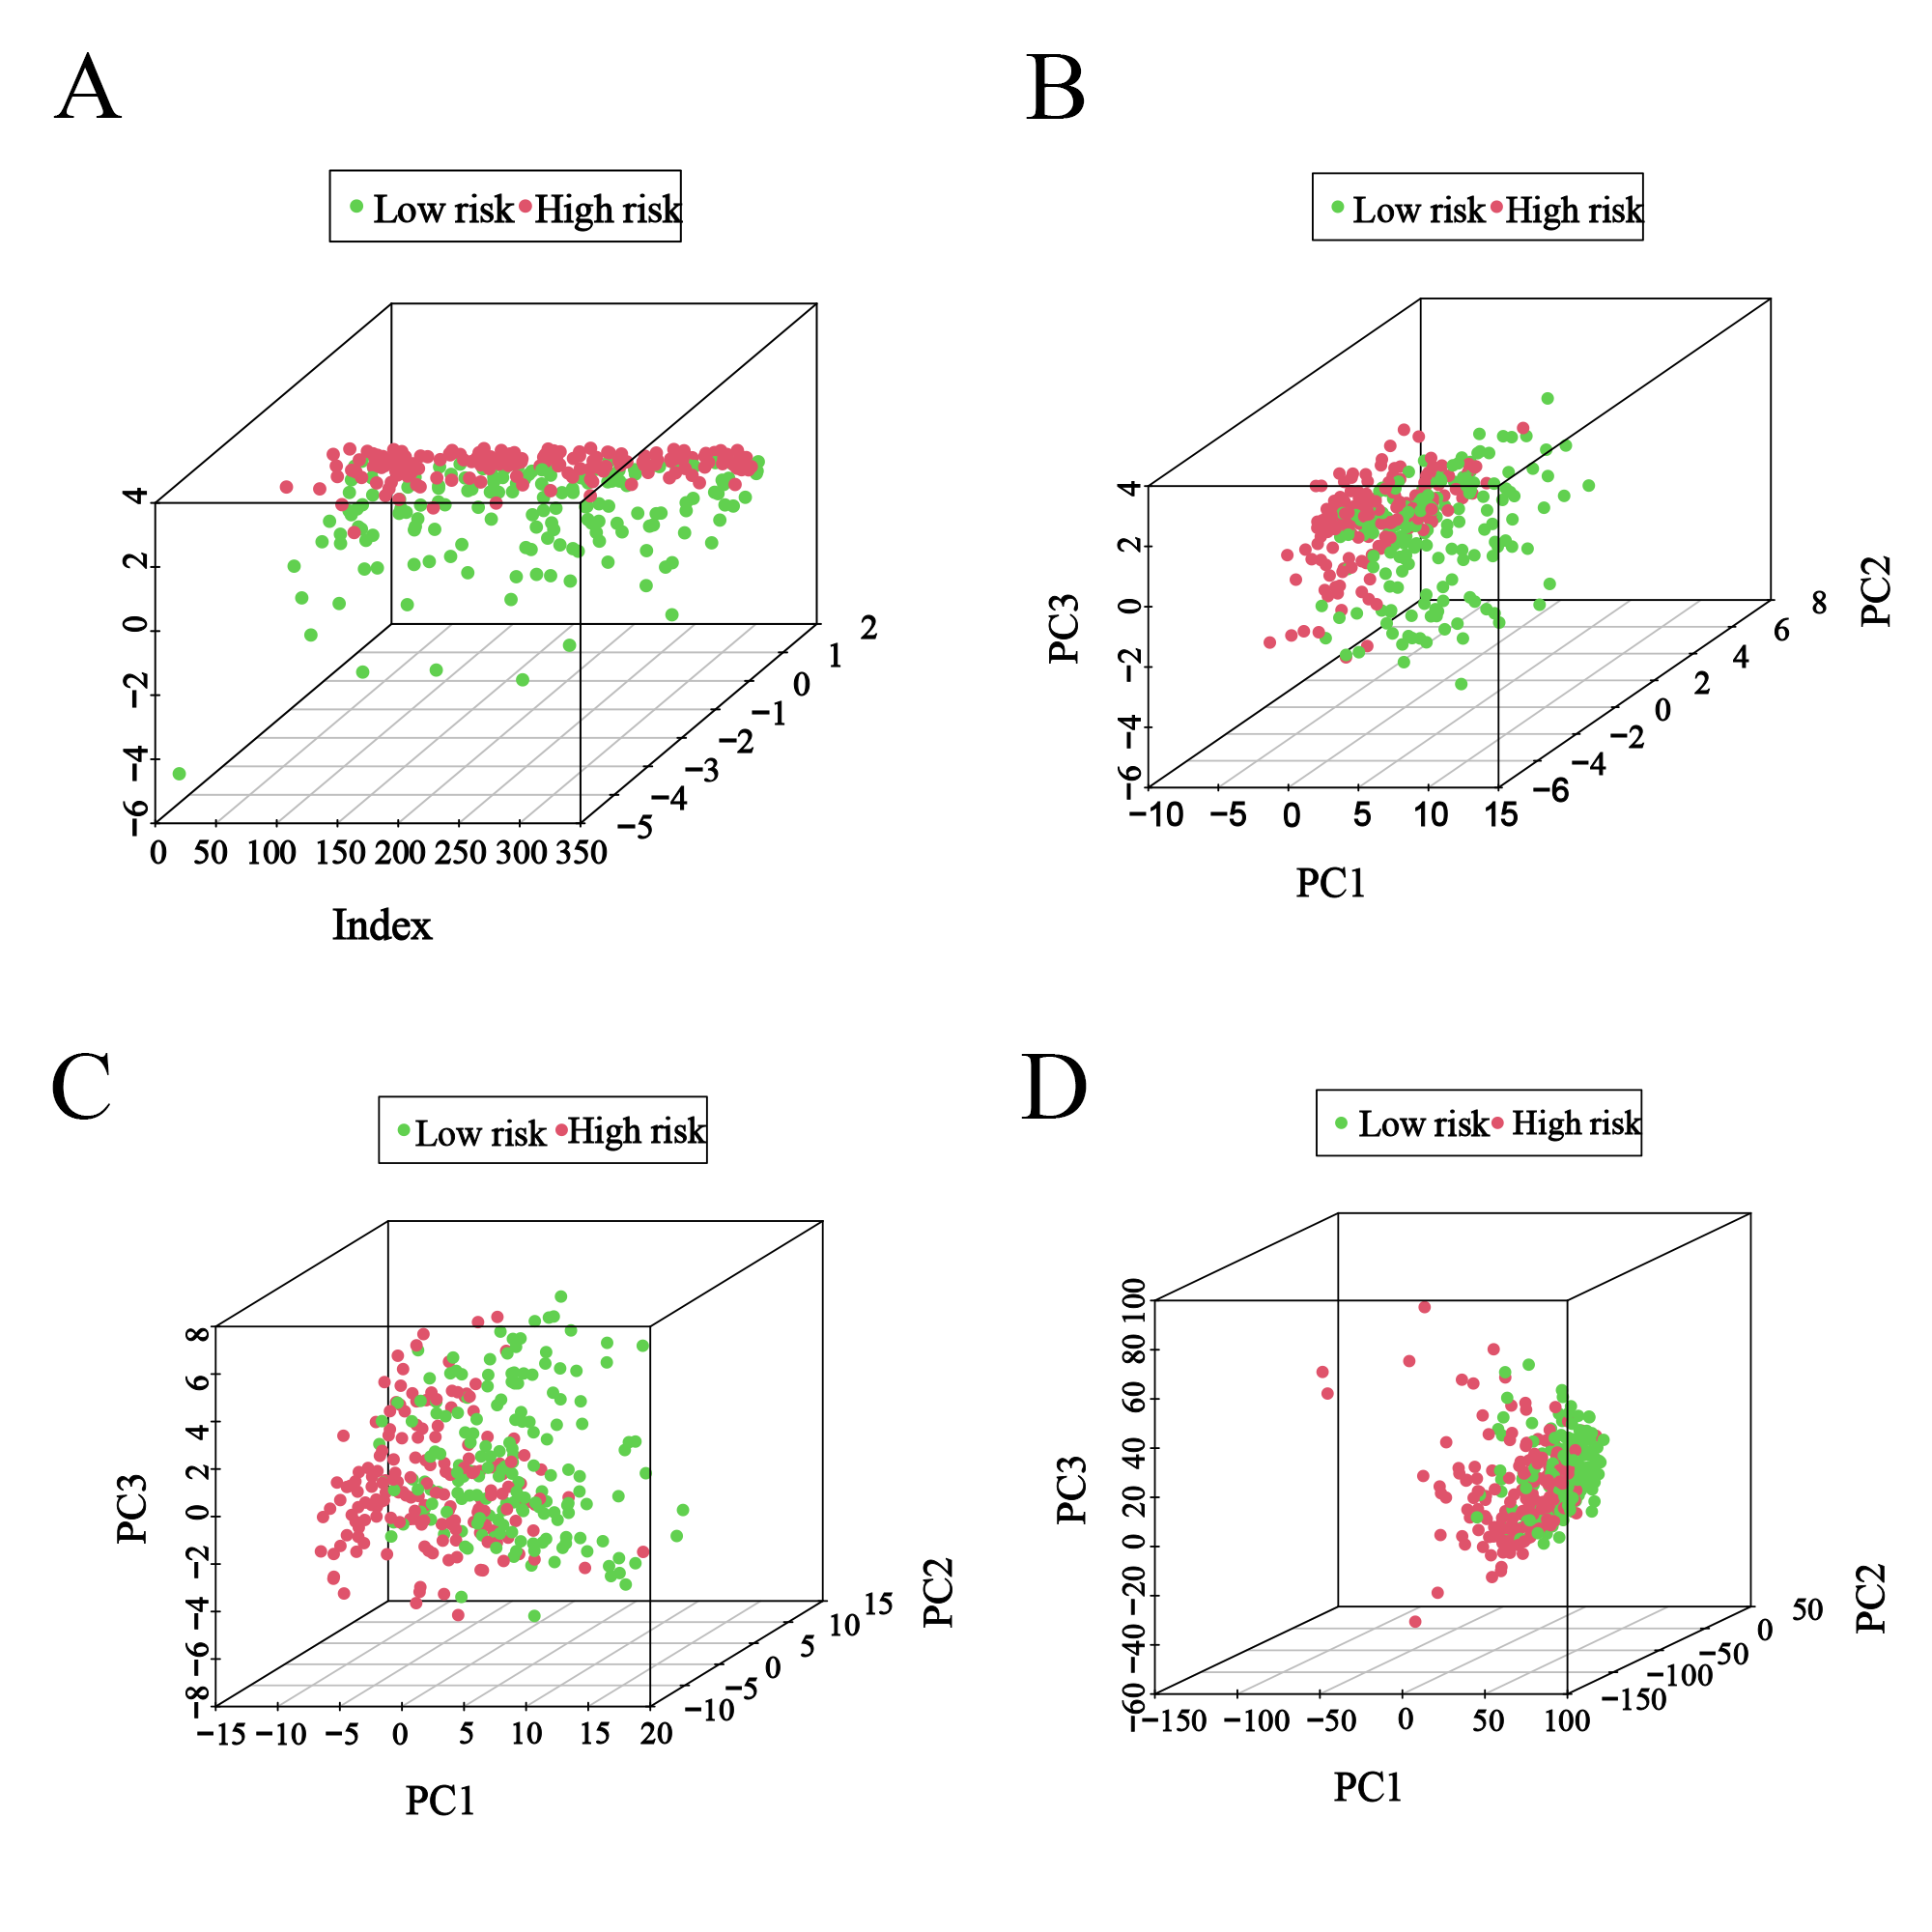


**Supplementary Figure 5** Correlation between risk scores and clinicopathological characteristics in the TCGA dataset.

**
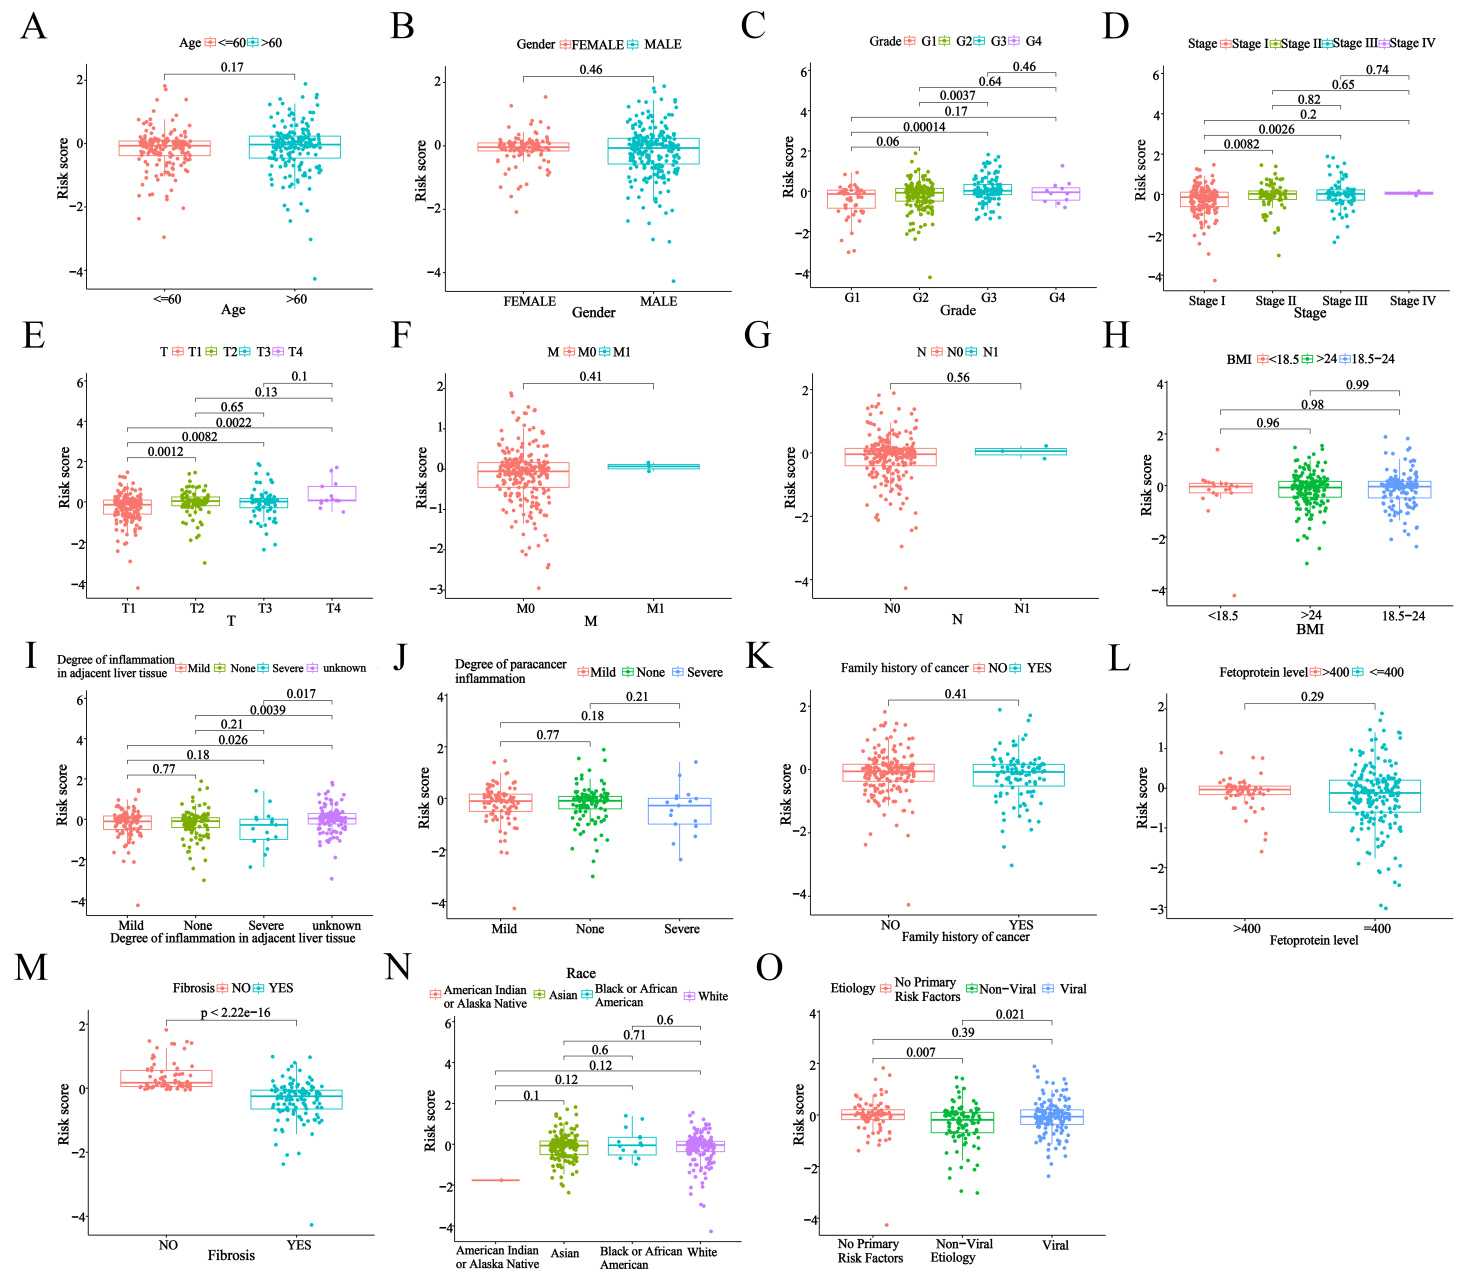
**

**Supplementary Figure 6** Correlation between risk scores and clinicopathological characteristics in the TCGA dataset.


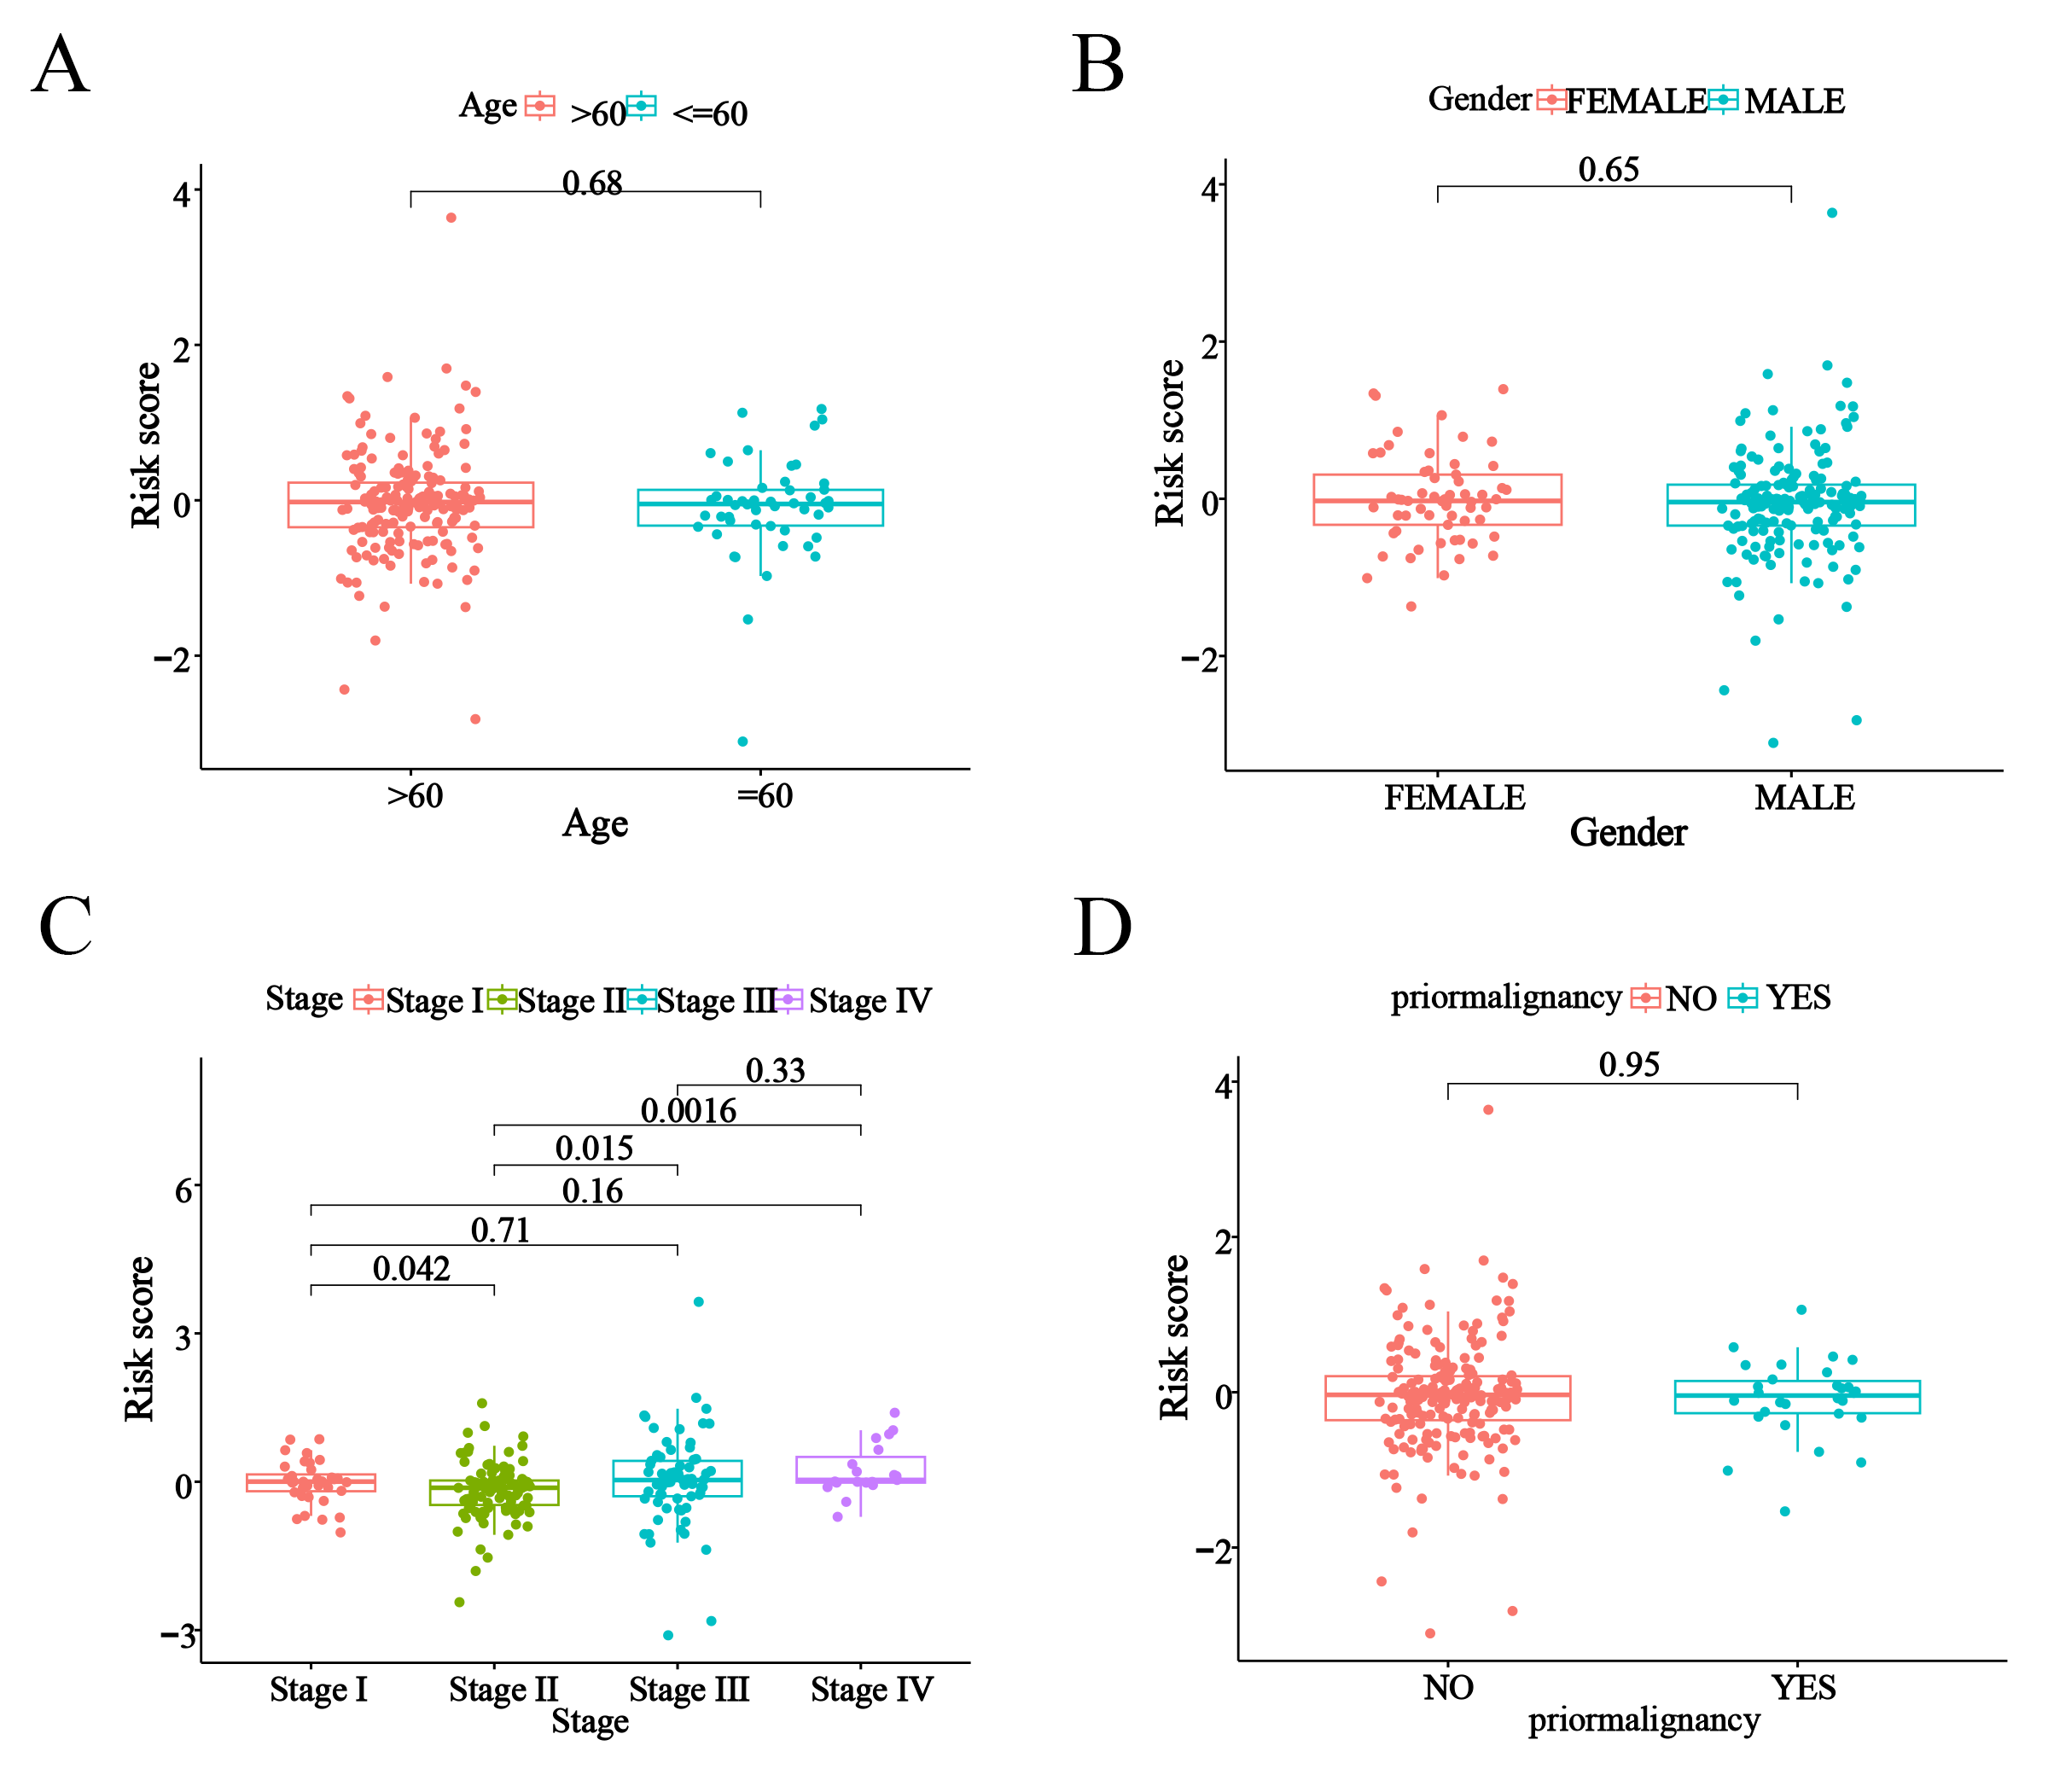


**Supplementary Figure 7** (A) TXNRD1 Correlation of the levels of immune infiltration in HCC. (B) ALAS1 Correlation of the levels of immune infiltration in HCC.

**
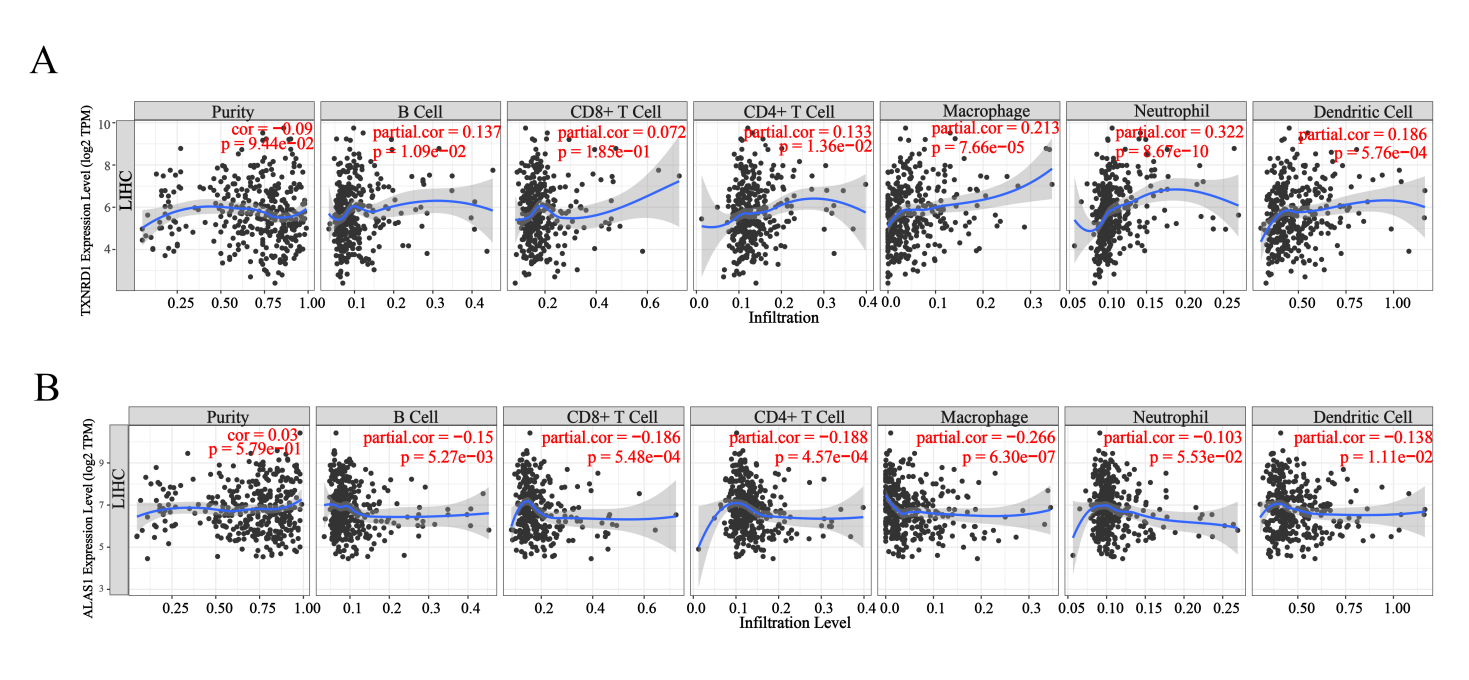
**

**Supplementary Figure 8** Types of 12 subgroups of cells in the GSE146115 single-cell dataset.


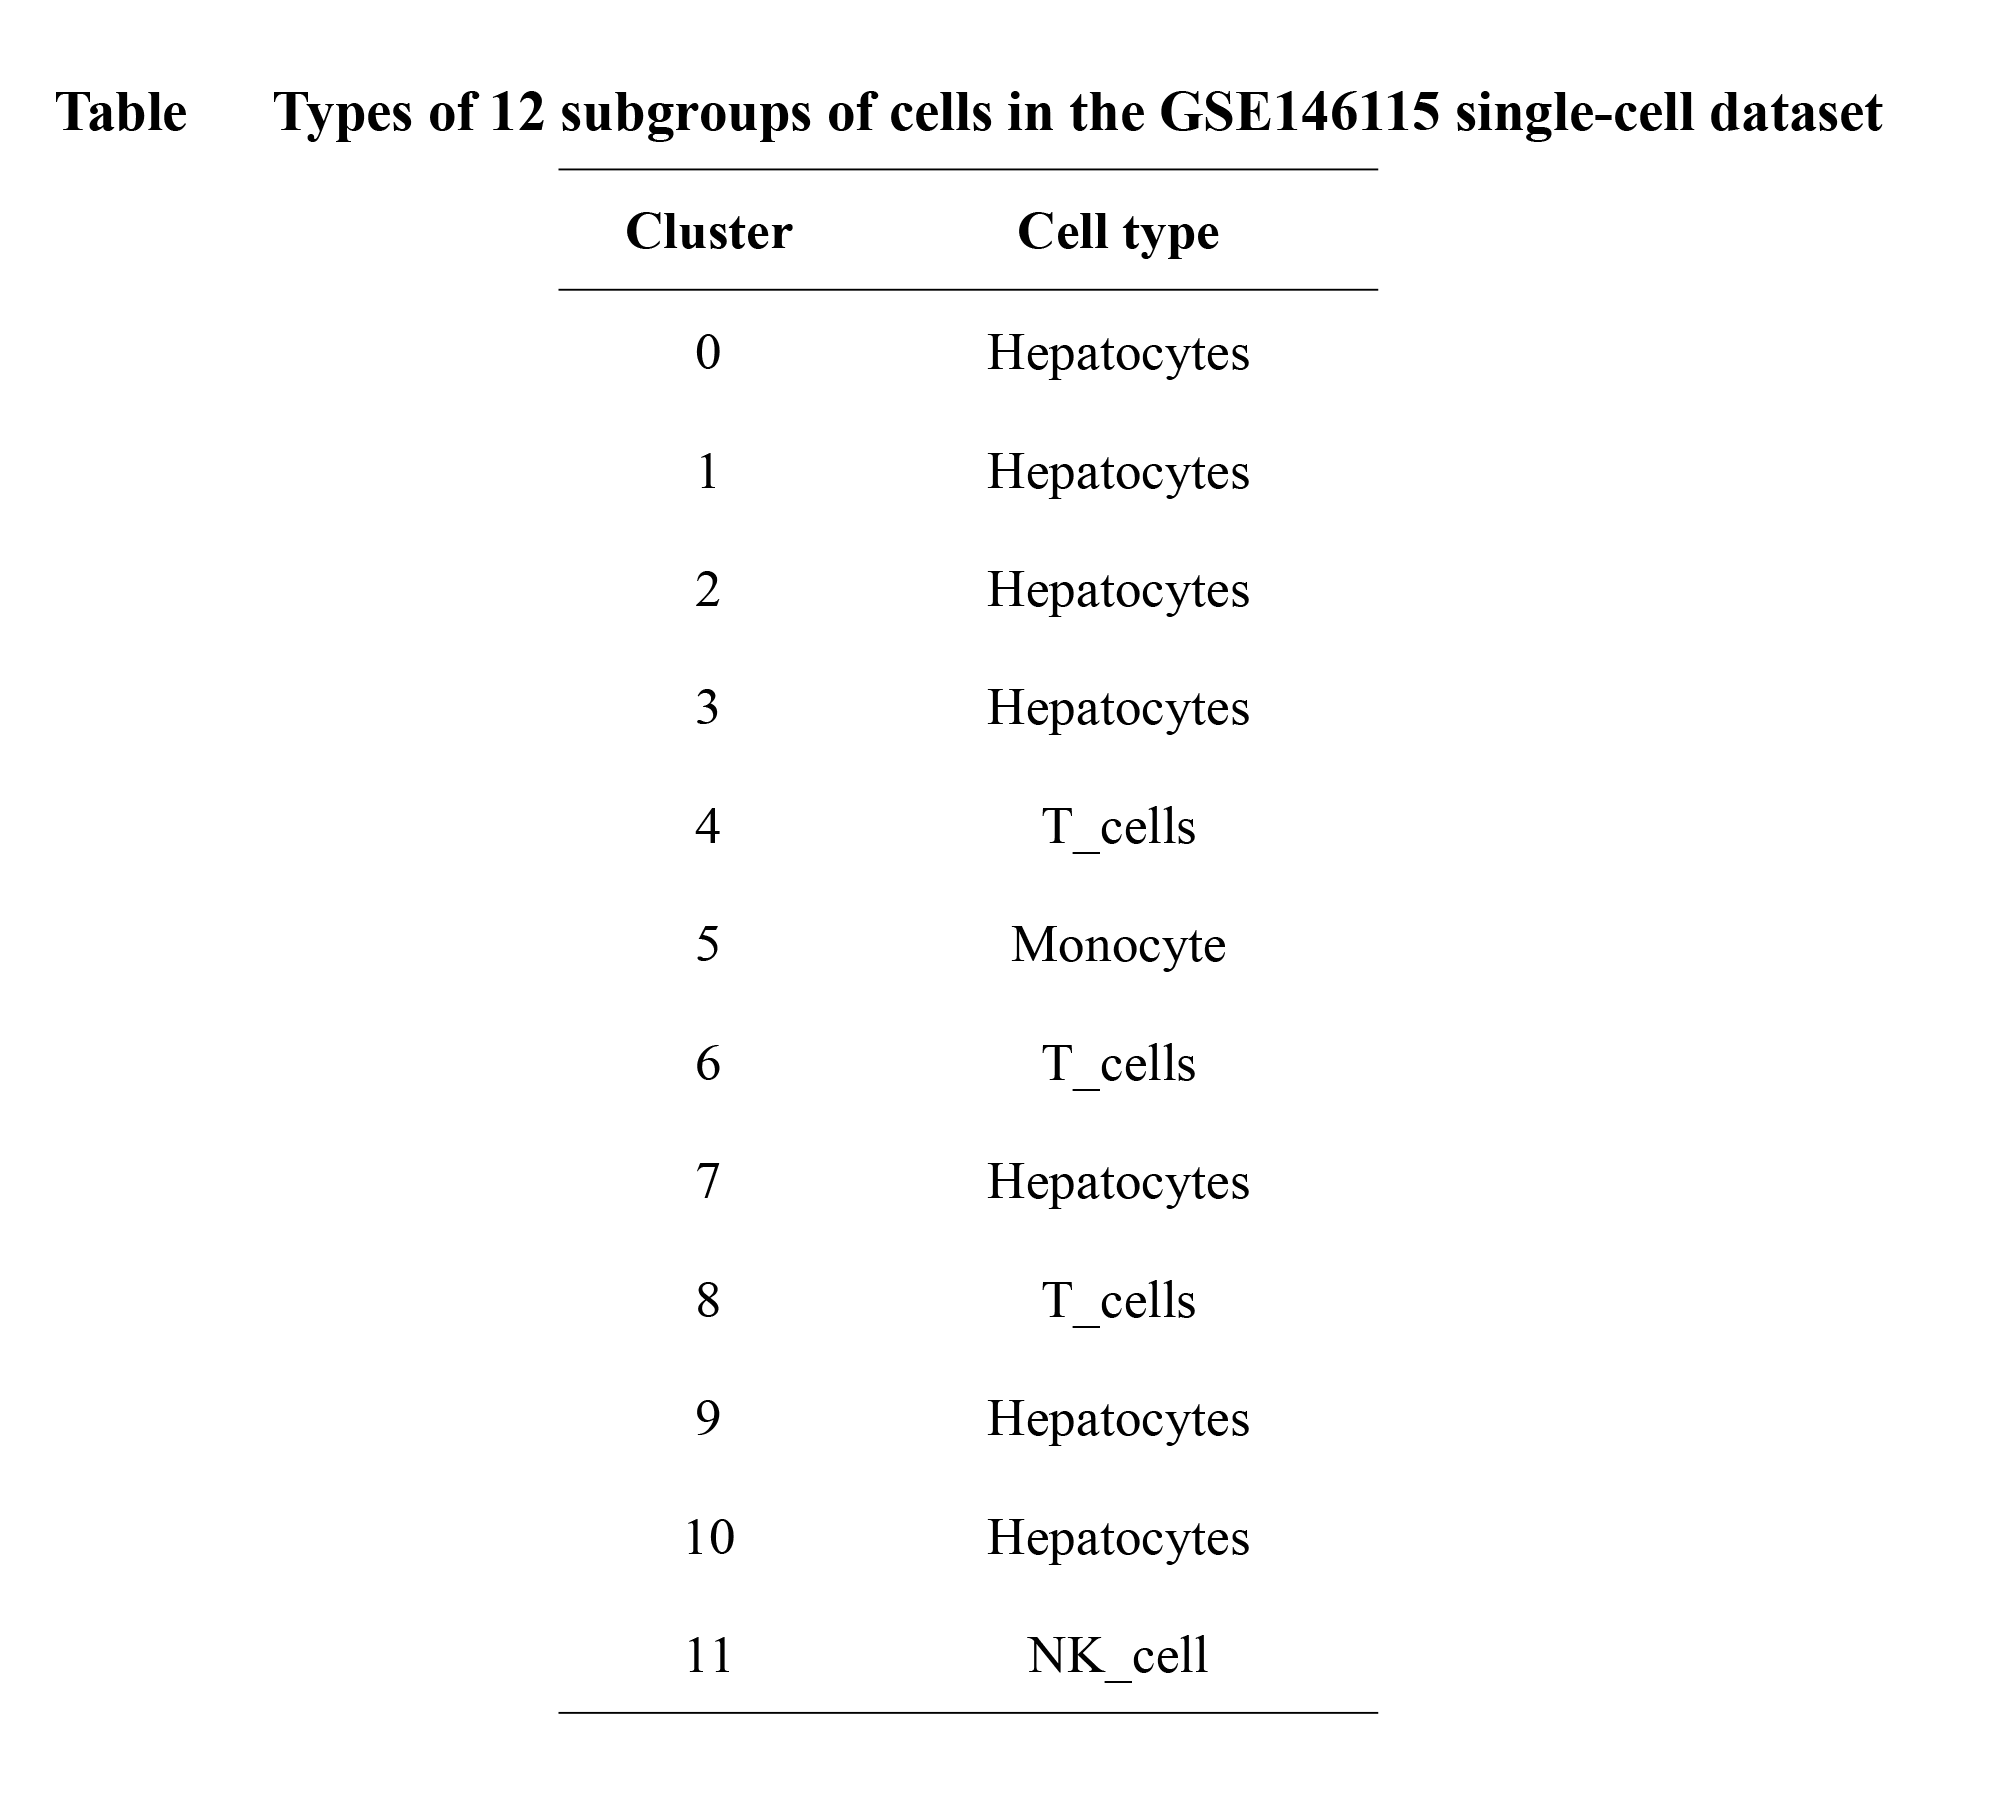

Supplement: Supplementary file 2 [file 611635174da3570f198b6d14.docx]
