# Supplementary material for: Identification of prognostic signatures of ferroptosis and autophagy-dependent lipid metabolism-related genes in hepatocellular carcinoma
Source: Research Square preprint supplement (doi:10.21203/rs.3.rs-6502562/v1), 2025-05-05
Supplement: Supplementary file 1 [file 5a5f6ac4ba99ae8c2d725b6b.xlsx]

## Sheet: Additional file 1
Id	Futime（day)	Fustat	Age	Gender	Grade	Stage	T	M	N	BMI	Race	relative_family_cancer_history	fibrosis	adjacent_hepatic_tissue_inflammation_extent_type	fetoprotein level	Etiology
TCGA-2V-A95S	unknown	alive	unknown	MALE	G3	Stage II	T2	unknown	unknown	26.0617	Asian	NO	unknown	unknown	unknown	Non-Viral
TCGA-2Y-A9GS	724	dead	58	MALE	G2	unknown	T2	unknown	unknown	35.0556	White	unknown	unknown	None	≤400	Viral
TCGA-2Y-A9GT	1624	dead	51	MALE	G2	Stage I	T1	unknown	unknown	36.8313	White	YES	unknown	None	≤400	Viral
TCGA-2Y-A9GU	1939	alive	55	FEMALE	G2	Stage I	T1	unknown	unknown	32.8892	White	YES	unknown	None	＞400	No Primary Risk Factors
TCGA-2Y-A9GV	2532	dead	54	FEMALE	G1	Stage I	T1	unknown	unknown	30.478	White	NO	Established Cirrhosis	unknown	≤400	No Primary Risk Factors
TCGA-2Y-A9GW	1271	dead	64	MALE	G2	Stage I	T1	unknown	N0	41.9635	White	YES	unknown	None	≤400	Non-Viral
TCGA-2Y-A9GX	2442	alive	68	MALE	G2	Stage I	T1	unknown	unknown	33.9592	White	NO	Portal Fibrosis	None	≤400	No Primary Risk Factors
TCGA-2Y-A9GY	757	dead	64	FEMALE	G3	Stage II	T2	unknown	unknown	35.4925	White	YES	unknown	None	＞400	Viral
TCGA-2Y-A9GZ	848	dead	82	FEMALE	G2	Stage II	T2	unknown	unknown	21.7865	White	YES	unknown	None	≤400	No Primary Risk Factors
TCGA-2Y-A9H0	3675	alive	49	MALE	G1	Stage IIIA	T3	M0	N0	27.4691	White	unknown	unknown	None	＞400	No Primary Risk Factors
TCGA-2Y-A9H1	1229	dead	58	MALE	G2	Stage I	T1	unknown	unknown	30.4367	White	NO	Established Cirrhosis	unknown	≤400	Non-Viral
TCGA-2Y-A9H2	1731	alive	64	FEMALE	G3	Stage I	T1	unknown	N0	17.7557	White	NO	No Fibrosis	None	≤400	Viral
TCGA-2Y-A9H3	1516	alive	45	MALE	G1	Stage II	T2	unknown	unknown	32.7705	White	YES	unknown	None	＞400	No Primary Risk Factors
TCGA-2Y-A9H4	1452	alive	68	MALE	G2	Stage I	T1	unknown	N0	21.8724	Black or African American	YES	unknown	unknown	≤400	Viral
TCGA-2Y-A9H5	555	dead	59	FEMALE	G3	Stage I	T1	unknown	N0	27.993	White	YES	unknown	unknown	＞400	No Primary Risk Factors
TCGA-2Y-A9H6	357	alive	68	FEMALE	G2	Stage I	T1	unknown	unknown	40.6805	White	YES	unknown	None	≤400	Viral
TCGA-2Y-A9H7	1168	alive	81	FEMALE	G2	Stage I	T1	unknown	N0	42.1924	White	NO	Established Cirrhosis	None	≤400	Viral
TCGA-2Y-A9H8	633	dead	85	FEMALE	G2	unknown	T1	unknown	unknown	17.7778	White	YES	unknown	unknown	＞400	Non-Viral
TCGA-2Y-A9H9	697	alive	70	MALE	G2	Stage I	T1	unknown	N0	27.7743	White	YES	unknown	None	≤400	No Primary Risk Factors
TCGA-2Y-A9HA	36	dead	70	MALE	G2	Stage II	T2	unknown	unknown	24.1588	White	NO	Portal Fibrosis	None	≤400	Viral
TCGA-2Y-A9HB	260	alive	66	MALE	G2	Stage I	T1	unknown	unknown	26.5338	unknown	NO	Established Cirrhosis	None	≤400	Non-Viral
TCGA-3K-AAZ8	396	alive	65	MALE	G1	Stage IIIB	T3b	unknown	unknown	28.3937	Black or African American	NO	Established Cirrhosis	unknown	unknown	Non-Viral
TCGA-4R-AA8I	262	dead	66	MALE	G2	Stage II	T2	unknown	unknown	35.2245	White	NO	Established Cirrhosis	None	≤400	No Primary Risk Factors
TCGA-5C-A9VG	328	alive	58	MALE	G2	Stage II	T2	M0	N0	25.2595	White	NO	No Fibrosis	None	unknown	unknown
TCGA-5C-A9VH	322	alive	70	MALE	G2	Stage I	T1	M0	N0	25.3444	White	NO	Established Cirrhosis	None	unknown	No Primary Risk Factors
TCGA-5C-AAPD	20	alive	61	MALE	G1	Stage II	T2	M0	N0	23.3234	Asian	NO	unknown	unknown	unknown	Non-Viral
TCGA-5R-AA1C	520	alive	57	MALE	G2	Stage II	T2	M0	N0	29.7265	White	NO	Established Cirrhosis	None	≤400	Viral
TCGA-5R-AA1D	449	alive	17	FEMALE	G3	Stage IIIA	T3a	M0	N0	22.7615	White	NO	No Fibrosis	None	≤400	No Primary Risk Factors
TCGA-5R-AAAM	46	dead	65	FEMALE	G2	Stage II	T2	M0	N0	30.1103	White	NO	Portal Fibrosis	Severe	≤400	No Primary Risk Factors
TCGA-BC-4072	1490	dead	74	FEMALE	G3	Stage IIIA	T3	M0	N0	unknown	White	YES	unknown	unknown	unknown	No Primary Risk Factors
TCGA-BC-4073	849	alive	73	MALE	G3	Stage IIIA	T3	unknown	N0	unknown	White	YES	unknown	unknown	unknown	Viral
TCGA-BC-A10Q	1135	dead	72	FEMALE	unknown	unknown	T2	unknown	unknown	unknown	White	YES	unknown	unknown	unknown	No Primary Risk Factors
TCGA-BC-A10R	308	dead	66	FEMALE	G2	unknown	T3	unknown	unknown	unknown	White	YES	unknown	Mild	≤400	Viral
TCGA-BC-A10S	1423	dead	81	MALE	G1	unknown	T3	unknown	unknown	unknown	White	NO	Established Cirrhosis	None	unknown	Viral
TCGA-BC-A10T	837	dead	76	MALE	G1	unknown	T4	unknown	unknown	unknown	White	NO	Portal Fibrosis	unknown	unknown	No Primary Risk Factors
TCGA-BC-A10U	837	dead	69	MALE	G2	unknown	T2	unknown	unknown	unknown	White	YES	unknown	unknown	≤400	Viral
TCGA-BC-A10W	91	dead	50	MALE	G3	unknown	T4	unknown	unknown	unknown	Asian	YES	unknown	unknown	≤400	Non-Viral
TCGA-BC-A10X	770	dead	52	FEMALE	G2	Stage IIIA	T3a	unknown	N0	unknown	White	YES	unknown	None	＞400	unknown
TCGA-BC-A10Y	711	dead	76	MALE	G3	unknown	T4	unknown	unknown	25.1429	White	NO	Established Cirrhosis	None	＞400	Viral
TCGA-BC-A10Z	34	dead	62	FEMALE	G2	Stage I	T1	unknown	N0	unknown	White	YES	unknown	None	＞400	Viral
TCGA-BC-A110	2116	dead	51	FEMALE	G1	unknown	T1	unknown	unknown	37.8772	Black or African American	YES	unknown	unknown	unknown	Viral
TCGA-BC-A112	153	dead	80	MALE	G2	unknown	T3	unknown	unknown	35.629	White	NO	Portal Fibrosis	unknown	≤400	Non-Viral
TCGA-BC-A216	1351	alive	62	FEMALE	G2	Stage IIIA	T3	M0	unknown	56.1422	White	YES	unknown	Mild	≤400	Viral
TCGA-BC-A217	1397	dead	75	FEMALE	G3	Stage II	T2	M0	unknown	30.4867	White	NO	Established Cirrhosis	None	≤400	Viral
TCGA-BC-A3KF	8	alive	66	FEMALE	G2	Stage I	T1	M0	unknown	19.3792	White	YES	unknown	unknown	unknown	unknown
TCGA-BC-A3KG	680	alive	68	FEMALE	G3	Stage II	T2	M0	N0	25.3155	White	NO	No Fibrosis	unknown	＞400	No Primary Risk Factors
TCGA-BC-A5W4	547	dead	69	MALE	G3	Stage IIIA	T3a	M0	unknown	31.6522	White	NO	Established Cirrhosis	None	unknown	Viral
TCGA-BC-A69H	444	alive	64	MALE	G3	Stage II	T2	M0	unknown	23.3887	White	NO	Portal Fibrosis	None	＞400	Viral
TCGA-BC-A69I	387	alive	69	MALE	G1	Stage I	T1	M0	N0	29.321	White	YES	unknown	None	≤400	Non-Viral
TCGA-BC-A8YO	562	alive	66	FEMALE	G3	Stage IIIC	T4	M0	N0	25.6055	White	YES	unknown	None	unknown	Viral
TCGA-BD-A2L6	1363	alive	69	MALE	G2	unknown	T2	unknown	unknown	38.9739	White	unknown	unknown	None	≤400	Viral
TCGA-BD-A3EP	409	alive	75	FEMALE	G2	Stage I	T1	M0	N0	25.1559	Black or African American	NO	No Fibrosis	Mild	≤400	No Primary Risk Factors
TCGA-BD-A3ER	1115	alive	62	MALE	G2	Stage II	T2	unknown	unknown	31.4056	White	NO	Portal Fibrosis	Mild	≤400	No Primary Risk Factors
TCGA-BW-A5NO	20	alive	50	MALE	G2	Stage IIIA	T3a	unknown	unknown	unknown	Black or African American	unknown	unknown	unknown	unknown	Non-Viral
TCGA-BW-A5NP	0	alive	26	FEMALE	G3	Stage IV	T2	M1	N0	unknown	White	unknown	unknown	unknown	unknown	Viral
TCGA-BW-A5NQ	0	alive	63	MALE	G3	Stage I	T1	unknown	unknown	unknown	White	unknown	unknown	unknown	unknown	Non-Viral
TCGA-CC-5258	129	dead	48	MALE	G2	Stage II	T2	M0	N0	unknown	Asian	NO	No Fibrosis	unknown	unknown	Non-Viral
TCGA-CC-5259	250	alive	60	FEMALE	G2	Stage IIIC	T4	M0	N0	20.9321	Asian	NO	No Fibrosis	unknown	unknown	No Primary Risk Factors
TCGA-CC-5260	87	dead	61	FEMALE	G1	Stage IIIC	T4	M0	N0	19.6506	Asian	NO	No Fibrosis	unknown	unknown	Non-Viral
TCGA-CC-5261	97	dead	44	MALE	G2	Stage II	T2	M0	N0	18.9388	Asian	unknown	Established Cirrhosis	unknown	unknown	unknown
TCGA-CC-5262	103	dead	67	MALE	G1	Stage IIIC	T4	M0	N0	21.4533	Asian	NO	No Fibrosis	unknown	unknown	Non-Viral
TCGA-CC-5263	129	dead	35	MALE	G1	Stage IIIA	T3	M0	N0	22.2063	Asian	NO	No Fibrosis	unknown	unknown	Non-Viral
TCGA-CC-5264	102	dead	71	MALE	G2	Stage IIIA	T3	M0	N0	20.3125	Asian	unknown	Established Cirrhosis	unknown	unknown	unknown
TCGA-CC-A123	219	alive	24	FEMALE	G1	Stage IIIA	T3	M0	N0	unknown	Asian	unknown	unknown	unknown	unknown	unknown
TCGA-CC-A1HT	101	dead	50	MALE	G3	Stage IIIA	T3	M0	N0	20.3244	Asian	NO	No Fibrosis	unknown	unknown	Non-Viral
TCGA-CC-A3M9	300	dead	45	MALE	G3	Stage IIIA	T3	M0	N0	20.148	Asian	NO	No Fibrosis	unknown	unknown	Non-Viral
TCGA-CC-A3MA	303	dead	61	MALE	G2	Stage IIIA	T3	M0	N0	23.3844	Asian	NO	No Fibrosis	unknown	unknown	Non-Viral
TCGA-CC-A3MB	315	dead	36	MALE	G1	Stage IIIA	T3	M0	N0	18.7242	Asian	NO	No Fibrosis	unknown	unknown	No Primary Risk Factors
TCGA-CC-A3MC	363	alive	54	MALE	G2	Stage IIIA	T3	M0	N0	19.5717	Asian	NO	No Fibrosis	unknown	unknown	Non-Viral
TCGA-CC-A5UC	347	dead	63	MALE	G3	Stage IIIA	T3	M0	N0	20.9366	Asian	NO	No Fibrosis	unknown	unknown	Non-Viral
TCGA-CC-A5UD	304	dead	45	MALE	G2	Stage IIIA	T3	M0	N0	21.4533	Asian	NO	No Fibrosis	unknown	unknown	Non-Viral
TCGA-CC-A5UE	272	dead	48	MALE	G2	Stage IIIB	T4	M0	N0	21.2245	Asian	NO	No Fibrosis	unknown	unknown	Non-Viral
TCGA-CC-A7IE	217	dead	57	MALE	G2	Stage IIIA	T3	M0	N0	20.9573	Asian	NO	No Fibrosis	unknown	unknown	Non-Viral
TCGA-CC-A7IF	649	dead	59	MALE	G1	Stage IIIA	T3	M0	N0	20.3074	Asian	NO	No Fibrosis	unknown	unknown	Non-Viral
TCGA-CC-A7IG	299	dead	47	MALE	G2	Stage II	T2	M0	N0	20.4783	Asian	NO	No Fibrosis	unknown	unknown	Non-Viral
TCGA-CC-A7IH	365	alive	58	MALE	G1	Stage IIIA	T3	M0	N0	18.2857	Asian	NO	Portal Fibrosis	unknown	unknown	Non-Viral
TCGA-CC-A7II	399	alive	54	MALE	G3	Stage IIIA	T3	M0	N0	18.424	Asian	NO	No Fibrosis	unknown	unknown	Non-Viral
TCGA-CC-A7IJ	382	alive	56	MALE	G3	Stage II	T2	M0	N0	19.8347	Asian	NO	No Fibrosis	unknown	unknown	Non-Viral
TCGA-CC-A7IK	262	dead	59	MALE	G3	Stage IIIA	T3	M0	N0	20.1956	Asian	NO	No Fibrosis	unknown	unknown	Non-Viral
TCGA-CC-A7IL	278	dead	61	MALE	G1	Stage IIIA	T3	M0	N0	20.8086	Asian	NO	Fibrous Speta	unknown	unknown	Non-Viral
TCGA-CC-A8HS	300	dead	18	MALE	G1	Stage IIIC	T3	M0	N1	20.9573	Asian	NO	Portal Fibrosis	unknown	unknown	No Primary Risk Factors
TCGA-CC-A8HT	140	dead	74	MALE	G2	Stage IIIA	T3	M0	N0	18.9866	Asian	NO	No Fibrosis	unknown	unknown	Non-Viral
TCGA-CC-A8HU	344	dead	39	FEMALE	G3	Stage IIIA	T3	M0	N0	15.8079	Asian	NO	No Fibrosis	unknown	unknown	No Primary Risk Factors
TCGA-CC-A8HV	279	dead	51	FEMALE	G2	Stage II	T2	M0	N0	20.1733	Asian	NO	No Fibrosis	unknown	unknown	No Primary Risk Factors
TCGA-CC-A9FS	211	alive	55	MALE	G2	Stage II	T2	M0	N0	23.7812	Asian	NO	Nodular Formation and Incomplete Cirrhosis	unknown	unknown	Non-Viral
TCGA-CC-A9FU	0	alive	52	FEMALE	G2	Stage IIIA	T3a	M0	N0	20.5049	Asian	NO	unknown	unknown	unknown	Non-Viral
TCGA-CC-A9FV	0	alive	57	MALE	G2	Stage IIIA	T3	M0	N0	21.6713	Asian	NO	unknown	unknown	unknown	Non-Viral
TCGA-CC-A9FW	248	alive	68	MALE	G2	Stage IIIA	T3	M0	N0	21.8776	Asian	NO	No Fibrosis	unknown	unknown	Viral
TCGA-DD-A113	2425	alive	55	FEMALE	G3	Stage II	T2	M0	N0	23.6128	White	unknown	unknown	None	≤400	Viral
TCGA-DD-A114	1149	dead	42	MALE	G3	Stage II	T2	M0	unknown	24.7252	Black or African American	NO	Portal Fibrosis	Mild	≤400	Non-Viral
TCGA-DD-A115	2542	dead	53	MALE	G2	Stage IIIA	T3	M0	N0	27.9904	White	NO	Portal Fibrosis	None	≤400	Viral
TCGA-DD-A116	1622	dead	68	MALE	G3	Stage IIIA	T3	M0	N0	23.8367	Asian	NO	Nodular Formation and Incomplete Cirrhosis	unknown	≤400	No Primary Risk Factors
TCGA-DD-A118	3437	alive	77	FEMALE	G2	Stage II	T2	M0	N0	26.2596	White	NO	No Fibrosis	None	＞400	Viral
TCGA-DD-A119	223	dead	40	MALE	G3	Stage IV	T3a	M1	N0	22.6562	Asian	YES	unknown	None	＞400	Viral
TCGA-DD-A11A	79	alive	67	MALE	G3	Stage I	T1	M0	N0	27.5312	Black or African American	NO	Established Cirrhosis	None	≤400	Viral
TCGA-DD-A11B	14	dead	73	MALE	G2	Stage I	T1	M0	N0	40.9023	White	NO	unknown	unknown	unknown	Viral
TCGA-DD-A11C	662	alive	69	MALE	G3	Stage I	T1	M0	N0	35.5532	White	YES	unknown	None	≤400	No Primary Risk Factors
TCGA-DD-A11D	1560	dead	57	FEMALE	G2	Stage I	T1	M0	N0	27.4756	White	YES	unknown	None	≤400	Non-Viral
TCGA-DD-A1E9	2759	dead	70	MALE	G2	Stage I	T1	M0	N0	34.1401	White	YES	unknown	unknown	unknown	Non-Viral
TCGA-DD-A1EA	2415	alive	68	MALE	G2	Stage II	T2	M0	N0	33.305	Asian	YES	unknown	Mild	≤400	Viral
TCGA-DD-A1EB	2017	alive	72	FEMALE	G2	Stage I	T1	M0	N0	21.1927	unknown	YES	unknown	None	≤400	Non-Viral
TCGA-DD-A1EC	602	alive	20	FEMALE	G3	Stage I	T1	M0	N0	20.2848	White	NO	No Fibrosis	None	≤400	Non-Viral
TCGA-DD-A1ED	2301	alive	68	MALE	G1	Stage I	T1	M0	N0	30.1162	White	NO	Established Cirrhosis	None	≤400	No Primary Risk Factors
TCGA-DD-A1EE	349	dead	73	MALE	G3	Stage IIIA	T3	M0	N0	25.1429	White	NO	No Fibrosis	Severe	≤400	Non-Viral
TCGA-DD-A1EF	394	dead	57	FEMALE	G3	Stage I	T1	M0	N0	30.116	White	YES	unknown	Mild	＞400	Non-Viral
TCGA-DD-A1EG	1372	dead	76	MALE	G3	Stage I	T1	M0	N0	29.0533	White	YES	unknown	Mild	≤400	Viral
TCGA-DD-A1EH	1495	alive	23	MALE	G3	Stage III	T3	M0	N0	21.847	White	YES	unknown	None	＞400	Viral
TCGA-DD-A1EI	183	alive	46	MALE	G2	Stage I	T1	M0	N0	22.5306	Asian	NO	Fibrous Speta	Mild	≤400	Viral
TCGA-DD-A1EJ	1005	dead	71	FEMALE	G2	Stage IIIC	T1	M0	N1	26.986	White	YES	unknown	Mild	＞400	Viral
TCGA-DD-A1EK	558	dead	64	FEMALE	G2	Stage IVB	T4	M1	N0	38.3687	White	YES	unknown	Mild	≤400	Viral
TCGA-DD-A1EL	415	dead	23	MALE	G3	Stage II	T2	M0	N0	16.3024	Black or African American	NO	No Fibrosis	Mild	≤400	Viral
TCGA-DD-A39V	643	dead	77	MALE	G3	Stage II	T2	M0	unknown	26.0933	White	YES	unknown	None	unknown	No Primary Risk Factors
TCGA-DD-A39W	827	dead	29	FEMALE	G2	Stage III	T3	M0	N0	23.6203	White	unknown	unknown	unknown	unknown	No Primary Risk Factors
TCGA-DD-A39X	1694	dead	78	FEMALE	G2	Stage I	T1	M0	unknown	20.7756	White	YES	unknown	None	≤400	Viral
TCGA-DD-A39Y	171	dead	67	MALE	G3	Stage I	T1	M0	unknown	27.4406	Asian	YES	unknown	None	＞400	Viral
TCGA-DD-A39Z	601	dead	43	FEMALE	G2	Stage II	T2	M0	unknown	22.4059	unknown	YES	unknown	unknown	unknown	Viral
TCGA-DD-A3A0	785	dead	70	MALE	G2	Stage I	T1	M0	unknown	27.7743	White	NO	unknown	unknown	unknown	Viral
TCGA-DD-A3A1	233	dead	65	MALE	G2	Stage IIIA	T3b	M0	N0	22.7904	unknown	YES	unknown	None	≤400	Non-Viral
TCGA-DD-A3A2	2131	dead	76	FEMALE	G1	Stage I	T1	M0	N0	26.8274	White	NO	Established Cirrhosis	None	unknown	No Primary Risk Factors
TCGA-DD-A3A3	535	dead	45	MALE	G2	Stage I	T1	M0	N0	25.4581	Asian	NO	Established Cirrhosis	None	≤400	Non-Viral
TCGA-DD-A3A4	612	dead	37	MALE	G3	Stage IIIA	T3	M0	N0	18.1966	White	YES	unknown	None	unknown	Non-Viral
TCGA-DD-A3A5	3125	dead	66	FEMALE	G2	Stage III	T3	M0	N0	20.0692	White	NO	Established Cirrhosis	None	≤400	Viral
TCGA-DD-A3A6	3258	dead	72	FEMALE	G2	Stage II	T2	M0	N0	16.9796	White	NO	No Fibrosis	None	unknown	No Primary Risk Factors
TCGA-DD-A3A7	419	dead	67	MALE	G3	Stage IIIB	T3b	M0	N0	22.6347	unknown	YES	unknown	Mild	≤400	Non-Viral
TCGA-DD-A3A8	11	dead	75	MALE	G2	Stage II	T2	M0	N0	31.6001	White	YES	unknown	unknown	unknown	Viral
TCGA-DD-A3A9	931	dead	64	FEMALE	G2	Stage IVB	T4	M1	N0	21.9671	White	NO	No Fibrosis	None	＞400	No Primary Risk Factors
TCGA-DD-A4NA	1008	alive	67	FEMALE	G3	Stage IIIC	T2	M0	N1	33.7495	White	YES	unknown	None	≤400	Viral
TCGA-DD-A4NB	989	alive	25	MALE	G2	Stage I	T1	M0	N0	20.1607	White	YES	unknown	Mild	≤400	Non-Viral
TCGA-DD-A4ND	2746	alive	56	FEMALE	G3	Stage I	T1	M0	N0	33.9125	White	YES	unknown	None	unknown	No Primary Risk Factors
TCGA-DD-A4NE	660	dead	75	FEMALE	G3	Stage IIIA	T3a	M0	N0	27.3356	White	YES	unknown	None	≤400	Viral
TCGA-DD-A4NF	942	alive	72	MALE	G2	Stage I	T1	M0	N0	28.7347	White	NO	Established Cirrhosis	Mild	≤400	No Primary Risk Factors
TCGA-DD-A4NG	802	dead	77	MALE	G2	Stage IIIA	T3a	M0	unknown	34.9494	White	YES	unknown	None	≤400	Non-Viral
TCGA-DD-A4NH	917	alive	65	FEMALE	G3	Stage IIIB	T3b	M0	N0	32.8614	White	YES	unknown	None	＞400	Viral
TCGA-DD-A4NI	816	alive	67	MALE	G2	Stage II	T2	M0	unknown	33.464	White	YES	unknown	unknown	≤400	Non-Viral
TCGA-DD-A4NJ	928	alive	54	FEMALE	G2	Stage II	T2	M0	N0	32.7186	White	YES	unknown	Mild	≤400	Viral
TCGA-DD-A4NK	1210	dead	80	FEMALE	G2	Stage IIIA	T3	M0	N0	unknown	White	YES	unknown	None	≤400	Non-Viral
TCGA-DD-A4NL	1711	alive	46	MALE	G1	Stage I	T1	M0	N0	37.756	White	NO	Established Cirrhosis	None	≤400	No Primary Risk Factors
TCGA-DD-A4NN	899	dead	56	FEMALE	G3	Stage I	T1	M0	N0	22.2063	White	YES	unknown	unknown	＞400	Viral
TCGA-DD-A4NO	2245	alive	65	MALE	G1	Stage I	T1	M0	N0	35.1885	White	NO	Established Cirrhosis	Mild	≤400	No Primary Risk Factors
TCGA-DD-A4NP	3308	alive	32	MALE	G3	Stage I	T1	M0	N0	25.2163	White	NO	Established Cirrhosis	None	≤400	No Primary Risk Factors
TCGA-DD-A4NQ	373	dead	60	MALE	G3	Stage II	T2	M0	N0	29.6665	White	YES	unknown	Mild	≤400	Viral
TCGA-DD-A4NR	9	dead	85	FEMALE	G3	Stage I	T1	M0	N0	131.836	White	YES	unknown	unknown	unknown	Viral
TCGA-DD-A4NS	2456	dead	61	FEMALE	G2	Stage I	T1	M0	N0	20.7967	White	YES	unknown	None	≤400	Viral
TCGA-DD-A4NV	2398	alive	61	MALE	G1	Stage IIIA	T3	M0	N0	40.2609	White	YES	unknown	None	≤400	No Primary Risk Factors
TCGA-DD-A73A	728	alive	71	MALE	G2	Stage I	T1	M0	N0	33.6901	White	NO	Portal Fibrosis	Mild	≤400	No Primary Risk Factors
TCGA-DD-A73B	283	dead	72	FEMALE	G2	Stage I	T1	M0	N0	31.2026	White	YES	unknown	unknown	≤400	Viral
TCGA-DD-A73C	701	alive	65	FEMALE	G1	Stage IIIA	T3a	M0	N0	19.3821	White	YES	unknown	None	≤400	No Primary Risk Factors
TCGA-DD-A73D	693	alive	68	FEMALE	G1	Stage II	T2	unknown	unknown	35.2941	White	YES	unknown	Mild	≤400	No Primary Risk Factors
TCGA-DD-A73E	44	alive	66	MALE	G1	Stage I	T1	M0	N0	36.5062	White	YES	unknown	Mild	≤400	Viral
TCGA-DD-A73F	1085	alive	77	FEMALE	G1	Stage I	T1	M0	N0	25.6544	White	YES	unknown	None	≤400	Non-Viral
TCGA-DD-A73G	3478	alive	73	FEMALE	G3	Stage I	T1	M0	N0	18.3143	White	YES	unknown	None	＞400	Viral
TCGA-DD-AA3A	410	dead	81	FEMALE	G4	Stage I	T1	unknown	N0	26.3146	White	YES	unknown	None	≤400	Viral
TCGA-DD-AAC8	16	dead	72	MALE	G3	Stage I	T1	M0	N0	23.4221	Asian	NO	unknown	unknown	unknown	Viral
TCGA-DD-AAC9	347	alive	51	MALE	G2	Stage I	T1	M0	N0	26.7539	Asian	NO	Established Cirrhosis	Mild	≤400	Viral
TCGA-DD-AACA	2301	alive	65	MALE	G3	Stage I	T1	M0	N0	25.7117	Asian	NO	Established Cirrhosis	Mild	≤400	Viral
TCGA-DD-AACB	2324	alive	74	FEMALE	G3	Stage I	T1	M0	N0	29.5858	Asian	NO	No Fibrosis	Mild	＞400	Viral
TCGA-DD-AACC	1685	dead	61	MALE	G2	Stage I	T1	M0	N0	22.4059	Asian	NO	Fibrous Speta	Mild	≤400	Non-Viral
TCGA-DD-AACD	381	dead	48	MALE	G4	Stage I	T1	M0	N0	19.9251	Asian	YES	unknown	Mild	≤400	No Primary Risk Factors
TCGA-DD-AACE	2184	alive	62	MALE	G3	Stage I	T1	M0	N0	23.6244	Asian	NO	Fibrous Speta	Mild	≤400	Viral
TCGA-DD-AACF	365	dead	68	MALE	G3	Stage I	T1	M0	N0	21.2585	Asian	NO	Fibrous Speta	Mild	≤400	Viral
TCGA-DD-AACG	469	dead	52	MALE	G4	Stage II	T2	M0	N0	23.03	Asian	NO	No Fibrosis	Mild	＞400	No Primary Risk Factors
TCGA-DD-AACH	195	dead	69	MALE	G3	Stage II	T2	M0	N0	20.7031	Asian	NO	No Fibrosis	Mild	≤400	Viral
TCGA-DD-AACI	1618	alive	69	MALE	G3	Stage II	T2	M0	N0	19.9792	Asian	NO	No Fibrosis	Mild	≤400	Viral
TCGA-DD-AACJ	2102	alive	75	MALE	G2	Stage II	T2	M0	N0	28.8754	Asian	NO	No Fibrosis	unknown	≤400	Viral
TCGA-DD-AACK	9	alive	70	MALE	G2	Stage I	T1	M0	N0	22.9854	Asian	NO	unknown	unknown	unknown	Viral
TCGA-DD-AACL	107	dead	66	FEMALE	G3	Stage I	T1	M0	N0	30.6667	Asian	NO	Established Cirrhosis	unknown	＞400	Viral
TCGA-DD-AACM	1769	alive	48	MALE	G3	Stage II	T2	M0	N0	21.7051	Asian	NO	unknown	unknown	unknown	Non-Viral
TCGA-DD-AACN	1302	alive	32	MALE	G3	Stage I	T1	M0	N0	23.939	Asian	NO	Nodular Formation and Incomplete Cirrhosis	unknown	＞400	Viral
TCGA-DD-AACO	1876	alive	40	MALE	G3	Stage I	T1	M0	N0	15.9875	Asian	NO	No Fibrosis	Mild	≤400	Non-Viral
TCGA-DD-AACP	415	alive	64	MALE	G3	Stage I	T1	M0	N0	25.8065	Asian	NO	No Fibrosis	None	＞400	Viral
TCGA-DD-AACQ	432	dead	50	MALE	G3	Stage II	T2	M0	N0	22.4082	Asian	NO	No Fibrosis	unknown	≤400	Viral
TCGA-DD-AACS	1804	alive	39	MALE	G3	Stage I	T1	M0	N0	27.0416	Asian	NO	Established Cirrhosis	unknown	≤400	Non-Viral
TCGA-DD-AACT	1562	alive	69	FEMALE	G2	Stage I	T1	M0	N0	24.8358	Asian	NO	No Fibrosis	Mild	≤400	Viral
TCGA-DD-AACU	1567	alive	59	MALE	G3	Stage I	T1	M0	N0	24.3141	Asian	NO	No Fibrosis	unknown	≤400	No Primary Risk Factors
TCGA-DD-AACV	1531	alive	53	MALE	G3	Stage I	T1	M0	N0	24.5089	Asian	NO	Established Cirrhosis	unknown	≤400	Viral
TCGA-DD-AACW	1424	alive	43	MALE	G3	Stage I	T1	M0	N0	23.5883	Asian	NO	Fibrous Speta	unknown	＞400	Viral
TCGA-DD-AACX	170	alive	66	MALE	G3	Stage II	T2	M0	N0	22.0604	Asian	NO	No Fibrosis	Mild	≤400	Non-Viral
TCGA-DD-AACY	1450	alive	61	MALE	G3	Stage I	T1	M0	N0	23.6244	Asian	NO	Fibrous Speta	Mild	≤400	unknown
TCGA-DD-AACZ	171	dead	63	FEMALE	G4	Stage I	T1	M0	N0	23.4224	Asian	NO	No Fibrosis	unknown	≤400	Viral
TCGA-DD-AAD0	137	alive	73	FEMALE	G2	Stage I	T1	M0	N0	24	Asian	NO	Nodular Formation and Incomplete Cirrhosis	Mild	≤400	Non-Viral
TCGA-DD-AAD1	564	alive	51	FEMALE	G4	Stage I	T1	M0	N0	16.9747	Asian	NO	Portal Fibrosis	unknown	＞400	No Primary Risk Factors
TCGA-DD-AAD2	658	alive	66	MALE	G2	Stage I	T1	M0	N0	21.3675	Asian	NO	Fibrous Speta	Mild	≤400	Viral
TCGA-DD-AAD3	1295	alive	43	MALE	G2	Stage I	T1	M0	N0	24.3025	Asian	NO	Nodular Formation and Incomplete Cirrhosis	Mild	unknown	Non-Viral
TCGA-DD-AAD5	1345	alive	54	MALE	G3	Stage I	T1	M0	N0	24.2215	Asian	NO	No Fibrosis	Mild	≤400	Viral
TCGA-DD-AAD6	672	alive	66	MALE	G3	Stage IIIA	T3a	M0	N0	33.3465	Asian	NO	No Fibrosis	unknown	unknown	Viral
TCGA-DD-AAD8	1219	alive	73	FEMALE	G2	Stage I	T1	M0	N0	24.6711	Asian	NO	No Fibrosis	Mild	≤400	Viral
TCGA-DD-AADA	1233	alive	66	FEMALE	G3	Stage I	T1	M0	N0	27.3034	Asian	NO	No Fibrosis	unknown	＞400	unknown
TCGA-DD-AADB	1242	alive	51	MALE	G4	Stage I	T1	M0	N0	24.977	Asian	NO	Established Cirrhosis	unknown	＞400	No Primary Risk Factors
TCGA-DD-AADC	425	dead	53	MALE	G3	Stage I	T1	M0	N0	26.1493	Asian	NO	No Fibrosis	unknown	≤400	Non-Viral
TCGA-DD-AADD	1231	alive	51	MALE	G4	Stage I	T1	M0	N0	24.093	Asian	NO	Nodular Formation and Incomplete Cirrhosis	unknown	＞400	Non-Viral
TCGA-DD-AADE	1202	alive	50	MALE	G4	Stage I	T1	M0	N0	22.8625	Asian	NO	unknown	unknown	unknown	Viral
TCGA-DD-AADF	115	dead	64	FEMALE	G4	Stage I	T1	M0	N0	26.1593	Asian	NO	Established Cirrhosis	unknown	＞400	Viral
TCGA-DD-AADG	1145	alive	70	MALE	G3	Stage IIIA	T3a	M0	N0	23.8281	Asian	NO	Nodular Formation and Incomplete Cirrhosis	Mild	＞400	Non-Viral
TCGA-DD-AADI	1085	alive	43	FEMALE	G3	Stage I	T1	M0	N0	23.5078	Asian	NO	Fibrous Speta	unknown	≤400	No Primary Risk Factors
TCGA-DD-AADJ	1066	alive	70	FEMALE	G3	Stage I	T1	M0	N0	24.8777	Asian	NO	Established Cirrhosis	unknown	＞400	Viral
TCGA-DD-AADK	1049	alive	68	FEMALE	G3	Stage II	T2	M0	N0	22.6667	Asian	NO	Fibrous Speta	None	≤400	Non-Viral
TCGA-DD-AADL	636	alive	58	MALE	G4	Stage I	T1	M0	N0	20.9644	Asian	YES	unknown	unknown	≤400	Non-Viral
TCGA-DD-AADM	12	dead	58	MALE	G3	Stage II	T2	M0	N0	21.7555	Asian	NO	unknown	unknown	unknown	Non-Viral
TCGA-DD-AADN	898	alive	59	MALE	G4	Stage I	T1	unknown	unknown	24.2188	Asian	NO	Portal Fibrosis	unknown	＞400	Non-Viral
TCGA-DD-AADO	453	alive	55	MALE	G3	Stage I	T1	M0	N0	20.5499	Asian	NO	Fibrous Speta	unknown	＞400	No Primary Risk Factors
TCGA-DD-AADP	458	alive	45	MALE	G3	Stage I	T1	M0	N0	24.0238	Asian	NO	Nodular Formation and Incomplete Cirrhosis	unknown	≤400	Viral
TCGA-DD-AADQ	436	alive	59	MALE	G3	Stage II	T2	M0	N0	23.5078	Asian	NO	Fibrous Speta	unknown	≤400	Viral
TCGA-DD-AADR	2028	alive	58	MALE	G3	Stage I	T1	M0	N0	25.9516	Asian	NO	No Fibrosis	Mild	≤400	Viral
TCGA-DD-AADS	474	alive	63	MALE	G2	Stage I	T1	M0	N0	19.7055	Asian	YES	unknown	unknown	≤400	No Primary Risk Factors
TCGA-DD-AADU	554	alive	60	MALE	G3	Stage II	T2	M0	N0	26.4915	Asian	YES	unknown	None	≤400	Non-Viral
TCGA-DD-AADV	574	alive	50	MALE	G3	Stage I	T1	M0	N0	20.6612	Asian	NO	No Fibrosis	None	≤400	Non-Viral
TCGA-DD-AADW	587	alive	48	MALE	G3	Stage I	T1	M0	N0	18.4425	Asian	NO	No Fibrosis	None	≤400	No Primary Risk Factors
TCGA-DD-AADY	555	alive	55	FEMALE	G2	Stage I	T1	M0	N0	21.2183	Asian	NO	Fibrous Speta	None	≤400	Non-Viral
TCGA-DD-AAE0	555	alive	45	FEMALE	G4	Stage IIIA	T3a	M0	N0	22.151	Asian	NO	No Fibrosis	Mild	＞400	Viral
TCGA-DD-AAE1	552	alive	52	MALE	G3	Stage I	T1	M0	N0	21.7079	Asian	NO	Fibrous Speta	Mild	＞400	Viral
TCGA-DD-AAE2	638	alive	51	MALE	G3	Stage I	T1	M0	N0	27.0842	Asian	NO	Established Cirrhosis	None	≤400	Viral
TCGA-DD-AAE3	566	alive	50	MALE	G2	Stage I	T1	M0	N0	26.8136	Asian	NO	Established Cirrhosis	None	≤400	Viral
TCGA-DD-AAE4	608	alive	49	FEMALE	G1	Stage I	T1	M0	N0	25.1532	Asian	NO	Established Cirrhosis	None	≤400	Viral
TCGA-DD-AAE6	141	alive	59	FEMALE	G2	Stage I	T1	M0	N0	18.1955	Asian	NO	Portal Fibrosis	None	≤400	Viral
TCGA-DD-AAE7	644	alive	72	MALE	G2	Stage I	T1	M0	N0	25.0135	Asian	NO	Established Cirrhosis	Severe	≤400	No Primary Risk Factors
TCGA-DD-AAE8	664	alive	45	MALE	G3	Stage I	T1	M0	N0	26.9896	Asian	NO	unknown	unknown	unknown	Viral
TCGA-DD-AAE9	722	alive	69	MALE	G3	Stage I	T1	M0	N0	23.1405	Asian	NO	No Fibrosis	Mild	≤400	No Primary Risk Factors
TCGA-DD-AAEA	575	alive	65	MALE	G3	Stage I	T1	M0	N0	24.841	Asian	NO	Established Cirrhosis	unknown	≤400	No Primary Risk Factors
TCGA-DD-AAEB	478	alive	60	MALE	G2	Stage I	T1	M0	N0	28.9341	Asian	NO	Established Cirrhosis	unknown	≤400	Non-Viral
TCGA-DD-AAED	763	alive	51	MALE	G3	Stage I	T1	M0	N0	25.0399	Asian	NO	No Fibrosis	Mild	＞400	No Primary Risk Factors
TCGA-DD-AAEE	810	alive	55	MALE	G4	Stage I	T1	M0	N0	22.6562	Asian	NO	Fibrous Speta	None	≤400	Viral
TCGA-DD-AAEG	719	alive	59	FEMALE	G3	Stage I	T1	M0	N0	18.0172	Asian	NO	No Fibrosis	None	≤400	Viral
TCGA-DD-AAEH	784	alive	73	MALE	G2	Stage I	T1	M0	N0	23.3355	Asian	NO	Fibrous Speta	None	unknown	Non-Viral
TCGA-DD-AAEI	1531	alive	72	MALE	G2	Stage I	T1	M0	N0	28.6689	Asian	NO	No Fibrosis	None	≤400	Viral
TCGA-DD-AAEK	1067	alive	51	MALE	G3	Stage II	T2	M0	N0	22.4082	Asian	NO	Fibrous Speta	None	＞400	No Primary Risk Factors
TCGA-DD-AAVP	2752	alive	48	MALE	G1	Stage I	T1	M0	N0	22.231	Asian	YES	unknown	Severe	≤400	Viral
TCGA-DD-AAVQ	2728	alive	38	MALE	G2	Stage I	T1	M0	N0	24.623	Asian	NO	Established Cirrhosis	Severe	＞400	Viral
TCGA-DD-AAVR	2513	alive	44	MALE	G2	Stage I	T1	M0	N0	25.3444	Asian	YES	unknown	None	≤400	Viral
TCGA-DD-AAVS	1823	alive	56	MALE	G2	Stage I	T1	M0	N0	25.2092	Asian	NO	Established Cirrhosis	Mild	＞400	Viral
TCGA-DD-AAVU	2202	alive	46	MALE	G2	Stage II	T2	M0	N0	34.375	Asian	NO	Established Cirrhosis	Mild	≤400	unknown
TCGA-DD-AAVV	2455	alive	56	MALE	G3	Stage II	T2	M0	N0	28.441	Asian	NO	No Fibrosis	Mild	≤400	Viral
TCGA-DD-AAVW	2317	alive	35	MALE	G2	Stage I	T1	M0	N0	23.6244	Asian	NO	No Fibrosis	None	≤400	Viral
TCGA-DD-AAVX	1718	alive	38	MALE	G2	Stage II	T2	M0	N0	20.5151	Asian	YES	unknown	Severe	≤400	Non-Viral
TCGA-DD-AAVY	1970	alive	56	MALE	G2	Stage IIIA	T3	M0	N0	24.3046	Asian	YES	unknown	None	≤400	Viral
TCGA-DD-AAVZ	1900	alive	38	MALE	G2	Stage I	T1	M0	N0	21.2031	Asian	YES	unknown	None	≤400	No Primary Risk Factors
TCGA-DD-AAW0	2015	alive	54	MALE	G2	Stage I	T1	M0	N0	25.3515	Asian	YES	unknown	Mild	≤400	Non-Viral
TCGA-DD-AAW1	1989	alive	55	MALE	G2	Stage IIIA	T3	M0	N0	21.5139	Asian	NO	Fibrous Speta	Severe	≤400	No Primary Risk Factors
TCGA-DD-AAW2	1855	alive	69	MALE	G2	Stage I	T1	M0	N0	20.5457	Asian	YES	unknown	None	≤400	Viral
TCGA-DD-AAW3	1633	alive	69	MALE	G2	Stage I	T1	M0	N0	24.3865	Asian	YES	unknown	None	≤400	Viral
TCGA-ED-A459	910	alive	47	MALE	G2	Stage II	T2	M0	N0	18.2868	Asian	NO	No Fibrosis	unknown	＞400	No Primary Risk Factors
TCGA-ED-A4XI	819	alive	58	MALE	G3	Stage II	T2	M0	N0	19.0311	Asian	NO	Portal Fibrosis	None	＞400	Non-Viral
TCGA-ED-A5KG	854	alive	60	FEMALE	G2	Stage II	T2	M0	N0	23.8281	Asian	NO	No Fibrosis	Severe	＞400	Non-Viral
TCGA-ED-A627	423	alive	74	MALE	G2	Stage I	T1	M0	unknown	23.8895	White	unknown	unknown	unknown	unknown	Viral
TCGA-ED-A66X	406	alive	35	MALE	G3	Stage IIIA	T3a	M0	N0	21.1073	Asian	NO	Fibrous Speta	Mild	＞400	Non-Viral
TCGA-ED-A66Y	296	dead	51	FEMALE	G3	Stage IIIA	T3a	M0	N0	23.0469	Asian	NO	No Fibrosis	Mild	＞400	No Primary Risk Factors
TCGA-ED-A7PX	6	alive	48	FEMALE	G3	Stage II	T2	M0	unknown	16.5889	Asian	NO	unknown	unknown	unknown	Non-Viral
TCGA-ED-A7PY	390	alive	20	FEMALE	G3	Stage II	T2	M0	unknown	16.4366	Asian	NO	Established Cirrhosis	Mild	≤400	No Primary Risk Factors
TCGA-ED-A7PZ	6	alive	61	MALE	G2	Stage II	T2	M0	unknown	19.7777	Asian	NO	unknown	unknown	unknown	No Primary Risk Factors
TCGA-ED-A7XO	427	alive	29	MALE	G2	Stage IIIA	T3a	M0	N0	20.898	Asian	NO	Fibrous Speta	Mild	≤400	Non-Viral
TCGA-ED-A7XP	400	alive	53	FEMALE	G3	Stage II	T2	M0	N0	21.9076	Asian	NO	No Fibrosis	Mild	≤400	No Primary Risk Factors
TCGA-ED-A82E	408	alive	60	FEMALE	G2	Stage IIIA	T3a	M0	N0	19.5556	Asian	NO	No Fibrosis	Mild	≤400	Viral
TCGA-ED-A8O5	406	alive	59	FEMALE	G3	Stage IIIA	T3a	M0	N0	23.1405	Asian	NO	Fibrous Speta	Mild	＞400	Viral
TCGA-ED-A8O6	56	dead	50	FEMALE	G3	Stage IIIA	T3a	M0	N0	16.5289	Asian	NO	Portal Fibrosis	Mild	＞400	Non-Viral
TCGA-ED-A97K	6	alive	54	MALE	G2	Stage IIIA	T3a	M0	N0	22.1453	Asian	NO	unknown	unknown	unknown	No Primary Risk Factors
TCGA-EP-A12J	570	alive	62	MALE	G1	Stage I	T1	unknown	unknown	unknown	Black or African American	YES	unknown	unknown	unknown	No Primary Risk Factors
TCGA-EP-A26S	608	alive	70	MALE	G2	Stage I	T1	unknown	N0	14.5266	White	NO	Established Cirrhosis	Mild	unknown	Non-Viral
TCGA-EP-A2KA	627	dead	52	FEMALE	G3	Stage IIIA	T3a	unknown	unknown	unknown	White	YES	unknown	unknown	≤400	Viral
TCGA-EP-A2KB	596	dead	46	FEMALE	G2	Stage I	T1	unknown	unknown	29.7521	White	NO	Established Cirrhosis	unknown	＞400	Viral
TCGA-EP-A2KC	19	dead	62	MALE	G3	Stage I	T1	unknown	unknown	unknown	Black or African American	NO	unknown	unknown	unknown	Viral
TCGA-EP-A3JL	303	alive	76	MALE	G2	Stage I	T1	unknown	unknown	25.8645	White	NO	Portal Fibrosis	unknown	≤400	Viral
TCGA-EP-A3RK	363	alive	73	MALE	G2	Stage IIIA	T3a	unknown	unknown	31.8773	White	NO	Portal Fibrosis	unknown	≤400	Non-Viral
TCGA-ES-A2HS	688	dead	80	MALE	G2	Stage I	T1	unknown	unknown	29.9383	White	NO	Established Cirrhosis	Mild	≤400	unknown
TCGA-ES-A2HT	438	dead	54	MALE	G2	Stage I	T1	unknown	unknown	26.4236	Black or African American	NO	Established Cirrhosis	Mild	≤400	Viral
TCGA-FV-A23B	1852	dead	70	FEMALE	unknown	Stage II	T2	M0	N0	unknown	White	unknown	unknown	unknown	unknown	No Primary Risk Factors
TCGA-FV-A2QQ	729	alive	80	MALE	G2	Stage I	T1	unknown	N0	unknown	White	unknown	unknown	unknown	unknown	Viral
TCGA-FV-A2QR	581	dead	75	MALE	G1	Stage I	T1	M0	N0	unknown	White	YES	unknown	unknown	unknown	unknown
TCGA-FV-A3I0	848	alive	76	FEMALE	G2	Stage II	T2	M0	unknown	unknown	White	unknown	unknown	unknown	unknown	No Primary Risk Factors
TCGA-FV-A3I1	247	dead	81	FEMALE	G2	Stage II	T2	unknown	N0	unknown	White	NO	Portal Fibrosis	unknown	unknown	Non-Viral
TCGA-FV-A3R2	194	dead	75	MALE	unknown	Stage I	T1	unknown	unknown	unknown	White	YES	unknown	unknown	unknown	No Primary Risk Factors
TCGA-FV-A3R3	366	dead	38	FEMALE	G2	Stage I	T1	unknown	unknown	37.4214	White	NO	Portal Fibrosis	unknown	unknown	No Primary Risk Factors
TCGA-FV-A495	1	alive	51	FEMALE	G2	Stage II	T2	M0	unknown	23.6614	White	YES	unknown	unknown	unknown	unknown
TCGA-FV-A496	10	alive	84	FEMALE	G2	Stage I	T1	M0	unknown	20.5761	White	YES	unknown	unknown	unknown	Viral
TCGA-FV-A4ZP	2486	dead	78	MALE	G2	Stage IIIA	T3	M0	unknown	24.4473	White	unknown	unknown	unknown	＞400	Viral
TCGA-FV-A4ZQ	12	alive	52	MALE	G2	Stage I	T1	M0	unknown	unknown	White	unknown	unknown	unknown	unknown	Viral
TCGA-G3-A25S	416	dead	64	MALE	G2	Stage I	T1	M0	N0	26.4915	White	NO	No Fibrosis	Mild	≤400	Viral
TCGA-G3-A25T	1553	alive	45	FEMALE	G2	Stage IIIA	T3	M0	N0	22.9481	White	NO	Established Cirrhosis	None	≤400	Viral
TCGA-G3-A25U	1636	alive	63	FEMALE	G3	Stage I	T1	M0	N0	20.0777	Asian	NO	Fibrous Speta	Mild	≤400	Viral
TCGA-G3-A25V	860	alive	68	MALE	G2	Stage I	T1	M0	N0	25.7371	White	NO	No Fibrosis	None	≤400	Viral
TCGA-G3-A25W	935	alive	79	FEMALE	G2	Stage IIIB	T3b	M0	N0	19.4734	White	YES	unknown	unknown	unknown	Non-Viral
TCGA-G3-A25X	1779	alive	73	MALE	G3	Stage II	T2	M0	N0	23.8751	Asian	NO	No Fibrosis	Mild	≤400	Viral
TCGA-G3-A25Y	452	dead	52	FEMALE	G3	Stage I	T1	M0	N0	22.8329	Asian	NO	Fibrous Speta	Mild	≤400	Viral
TCGA-G3-A25Z	655	alive	58	MALE	G2	Stage I	T1	M0	N0	23.0546	Asian	YES	unknown	Mild	≤400	No Primary Risk Factors
TCGA-G3-A3CG	673	alive	80	MALE	G2	Stage I	T1	M0	N0	32.9507	White	NO	Established Cirrhosis	Severe	≤400	Viral
TCGA-G3-A3CH	780	alive	53	MALE	G2	Stage IIIA	T3a	M0	N0	23.3556	Asian	NO	Fibrous Speta	Severe	≤400	Viral
TCGA-G3-A3CI	180	alive	71	MALE	G2	Stage I	T1	M0	N0	35.1393	White	NO	Established Cirrhosis	Mild	≤400	Non-Viral
TCGA-G3-A3CJ	594	alive	52	MALE	G2	Stage II	T2	M0	N0	23.7812	American Indian or Alaska Native	NO	Portal Fibrosis	Severe	≤400	Viral
TCGA-G3-A3CK	585	alive	61	MALE	G2	Stage I	T1	M0	N0	23.1834	Asian	YES	unknown	Mild	≤400	Viral
TCGA-G3-A5SI	768	dead	44	MALE	G2	Stage II	T2	M0	N0	23.6203	Asian	unknown	unknown	Mild	≤400	Viral
TCGA-G3-A5SJ	698	alive	59	MALE	G2	Stage I	T1	M0	unknown	29.7527	White	NO	Portal Fibrosis	Mild	≤400	Viral
TCGA-G3-A5SK	744	alive	58	MALE	G1	Stage I	T1	M0	unknown	23.4586	White	unknown	unknown	Mild	unknown	Non-Viral
TCGA-G3-A5SL	621	alive	70	MALE	G2	Stage II	T2	M0	unknown	27.1605	White	NO	Established Cirrhosis	None	≤400	Viral
TCGA-G3-A5SM	520	alive	58	MALE	G3	Stage II	T2	M0	unknown	31.3091	White	NO	Portal Fibrosis	unknown	≤400	No Primary Risk Factors
TCGA-G3-A6UC	671	alive	65	MALE	G2	Stage IIIB	T3b	M0	N0	27.4725	White	unknown	unknown	Mild	≤400	Viral
TCGA-G3-A7M5	447	alive	76	MALE	G2	Stage I	T1	unknown	unknown	25.2826	Asian	NO	Established Cirrhosis	None	≤400	No Primary Risk Factors
TCGA-G3-A7M6	632	alive	60	FEMALE	G3	Stage I	T1	unknown	unknown	30.8444	White	unknown	unknown	Mild	≤400	Viral
TCGA-G3-A7M7	361	alive	65	MALE	G1	Stage I	T1	unknown	unknown	23.5036	White	unknown	unknown	Severe	≤400	No Primary Risk Factors
TCGA-G3-A7M8	430	alive	31	MALE	G1	Stage I	T1	unknown	unknown	unknown	Asian	unknown	unknown	unknown	≤400	No Primary Risk Factors
TCGA-G3-A7M9	56	dead	70	MALE	G2	Stage IIIB	T3b	unknown	unknown	25.2595	White	unknown	unknown	None	＞400	Non-Viral
TCGA-G3-AAUZ	480	alive	48	MALE	G2	Stage I	T1	M0	N0	30.0781	unknown	unknown	unknown	Severe	≤400	Viral
TCGA-G3-AAV0	476	alive	58	MALE	G2	Stage I	T1	M0	N0	23.2335	Asian	unknown	unknown	None	≤400	Viral
TCGA-G3-AAV1	359	dead	51	MALE	G3	Stage IIIC	T4	M0	N0	30.2189	Asian	unknown	unknown	Severe	≤400	Viral
TCGA-G3-AAV2	372	alive	50	MALE	G1	Stage I	T1	M0	N0	unknown	White	unknown	unknown	unknown	≤400	Viral
TCGA-G3-AAV3	412	alive	58	FEMALE	G2	Stage II	T2	M0	N0	30.1162	White	YES	unknown	Severe	≤400	Non-Viral
TCGA-G3-AAV4	27	dead	83	FEMALE	G1	Stage I	T1	M0	N0	23.0112	White	YES	unknown	unknown	unknown	Viral
TCGA-G3-AAV5	354	alive	67	MALE	G2	Stage II	T2	M0	N0	32.3232	White	unknown	unknown	unknown	unknown	Non-Viral
TCGA-G3-AAV6	65	dead	53	FEMALE	G3	Stage IIIA	T3a	M0	N0	28.6501	White	unknown	unknown	Severe	＞400	Viral
TCGA-G3-AAV7	361	alive	38	MALE	G2	Stage II	T2	M0	N0	21.3039	Asian	unknown	Established Cirrhosis	Mild	≤400	Viral
TCGA-GJ-A3OU	879	alive	59	MALE	G2	Stage I	T1	unknown	unknown	61.6731	White	YES	unknown	unknown	≤400	Non-Viral
TCGA-GJ-A6C0	31	dead	75	FEMALE	G2	Stage II	T2	unknown	unknown	35.1562	White	YES	unknown	unknown	unknown	No Primary Risk Factors
TCGA-GJ-A9DB	67	dead	68	MALE	G2	Stage I	T1	unknown	N0	27.4529	White	YES	unknown	unknown	unknown	No Primary Risk Factors
TCGA-HP-A5MZ	91	dead	78	MALE	G2	Stage I	T1	M0	unknown	23.9591	unknown	unknown	unknown	unknown	unknown	No Primary Risk Factors
TCGA-HP-A5N0	752	dead	90	FEMALE	unknown	unknown	unknown	M0	unknown	26.7094	unknown	YES	unknown	None	unknown	No Primary Risk Factors
TCGA-K7-A5RF	631	alive	64	MALE	G1	Stage I	T1	unknown	unknown	23.9395	White	NO	Established Cirrhosis	unknown	≤400	Viral
TCGA-K7-A5RG	519	alive	66	MALE	G1	Stage I	T1	unknown	unknown	41.0973	Black or African American	YES	unknown	unknown	≤400	Non-Viral
TCGA-K7-A6G5	512	alive	66	MALE	G2	Stage I	T1	unknown	N0	23.6295	White	unknown	unknown	unknown	unknown	Non-Viral
TCGA-K7-AAU7	359	alive	61	MALE	G2	Stage II	T2a	unknown	unknown	unknown	White	YES	unknown	unknown	＞400	Viral
TCGA-KR-A7K0	65	dead	65	MALE	G1	Stage I	T1	M0	N0	21.7994	White	NO	No Fibrosis	unknown	≤400	Non-Viral
TCGA-KR-A7K2	829	alive	64	MALE	G1	Stage I	T1	M0	N0	28.6689	White	unknown	unknown	unknown	≤400	Non-Viral
TCGA-KR-A7K7	951	alive	61	FEMALE	G1	Stage II	T2	M0	N0	44.2885	White	unknown	unknown	unknown	＞400	No Primary Risk Factors
TCGA-KR-A7K8	906	alive	57	MALE	G1	Stage I	T1	M0	N0	37.7163	unknown	YES	unknown	None	≤400	No Primary Risk Factors
TCGA-LG-A6GG	387	alive	79	FEMALE	G2	Stage II	T2	M0	unknown	26.0375	White	unknown	unknown	None	unknown	unknown
TCGA-LG-A9QC	425	alive	48	MALE	G2	Stage I	T1	M0	unknown	29.1421	White	YES	unknown	Mild	unknown	No Primary Risk Factors
TCGA-LG-A9QD	366	alive	68	MALE	G2	Stage IIIA	T3a	M0	N0	26.2188	White	YES	unknown	Mild	unknown	No Primary Risk Factors
TCGA-MI-A75C	291	alive	64	MALE	G3	Stage I	T1	M0	N0	27.4286	White	unknown	unknown	unknown	≤400	Viral
TCGA-MI-A75E	507	alive	61	MALE	G2	Stage IIIC	T4	M0	N0	33.6327	White	YES	unknown	unknown	≤400	Viral
TCGA-MI-A75G	698	alive	63	MALE	G2	Stage II	T2	M0	N0	21.7776	White	YES	unknown	unknown	≤400	No Primary Risk Factors
TCGA-MI-A75H	747	alive	77	MALE	unknown	unknown	unknown	unknown	unknown	28.0664	White	unknown	unknown	unknown	≤400	unknown
TCGA-MI-A75I	630	alive	61	MALE	G1	unknown	T2	unknown	unknown	28.2933	Black or African American	YES	unknown	unknown	unknown	No Primary Risk Factors
TCGA-MR-A520	229	alive	58	MALE	G1	Stage I	T1	unknown	unknown	32.4584	White	unknown	unknown	unknown	unknown	unknown
TCGA-MR-A8JO	330	alive	34	MALE	G3	Stage I	T1	unknown	N0	23.4277	White	NO	No Fibrosis	unknown	≤400	No Primary Risk Factors
TCGA-NI-A4U2	1791	dead	71	MALE	G1	Stage IIIA	T3	unknown	unknown	28.0428	White	YES	unknown	None	≤400	Viral
TCGA-NI-A8LF	799	alive	74	MALE	G3	Stage I	T1	unknown	unknown	35.5665	White	YES	unknown	None	unknown	Viral
TCGA-O8-A75V	538	alive	54	MALE	G2	Stage I	T1	unknown	unknown	28.3951	unknown	YES	unknown	Mild	≤400	Viral
TCGA-PD-A5DF	639	dead	58	FEMALE	G2	Stage IIIB	T4	M0	N0	25.8166	White	YES	unknown	unknown	unknown	unknown
TCGA-QA-A7B7	94	alive	48	MALE	G2	Stage II	T2	unknown	unknown	33.3333	Black or African American	NO	Portal Fibrosis	Mild	＞400	Viral
TCGA-RC-A6M3	0	alive	24	MALE	G3	Stage II	T2	M0	N0	unknown	American Indian or Alaska Native	NO	unknown	unknown	unknown	unknown
TCGA-RC-A6M4	22	alive	74	FEMALE	G2	Stage IIIA	T3	unknown	unknown	unknown	White	YES	unknown	unknown	unknown	Non-Viral
TCGA-RC-A6M5	15	alive	20	FEMALE	G2	Stage IVA	T1	M0	N1	unknown	White	NO	unknown	unknown	unknown	No Primary Risk Factors
TCGA-RC-A6M6	9	alive	75	MALE	G3	Stage II	T2	M0	unknown	unknown	White	unknown	unknown	unknown	unknown	Non-Viral
TCGA-RC-A7S9	640	alive	47	FEMALE	G3	Stage I	T1	M0	N0	22.3757	Asian	unknown	Established Cirrhosis	Mild	≤400	Viral
TCGA-RC-A7SB	588	alive	53	MALE	G2	Stage II	T2	M0	N0	22.1367	Asian	unknown	unknown	None	≤400	Non-Viral
TCGA-RC-A7SF	579	alive	66	MALE	G2	Stage I	T1	M0	N0	26.2976	Asian	unknown	unknown	None	≤400	No Primary Risk Factors
TCGA-RC-A7SH	468	alive	42	MALE	G3	Stage II	T2	M0	N0	22.46	Asian	unknown	unknown	None	＞400	Viral
TCGA-RC-A7SK	472	alive	59	MALE	G3	Stage I	T1	M0	N0	21.0077	Asian	unknown	Established Cirrhosis	None	≤400	Viral
TCGA-RG-A7D4	1098	alive	69	MALE	G2	Stage II	T2	M0	N0	29.4078	Black or African American	YES	unknown	unknown	＞400	No Primary Risk Factors
TCGA-T1-A6J8	23	alive	68	MALE	G2	unknown	T1	M0	unknown	18.3907	White	unknown	unknown	unknown	unknown	Viral
TCGA-UB-A7MA	848	alive	62	FEMALE	G2	Stage II	T2b	M0	N0	31.2213	White	NO	Portal Fibrosis	None	＞400	No Primary Risk Factors
TCGA-UB-A7MB	601	alive	24	MALE	G3	Stage II	T2	unknown	unknown	19.1358	White	NO	Established Cirrhosis	None	＞400	No Primary Risk Factors
TCGA-UB-A7MC	500	alive	59	MALE	G3	Stage IIIA	T3a	unknown	N0	25.1808	White	NO	Established Cirrhosis	Mild	≤400	Non-Viral
TCGA-UB-A7MD	52	dead	67	MALE	G3	Stage I	T1	unknown	N0	18.6122	Black or African American	NO	No Fibrosis	unknown	≤400	Viral
TCGA-UB-A7ME	486	alive	51	MALE	G2	Stage I	T1	unknown	unknown	27.5482	Asian	NO	Established Cirrhosis	Mild	≤400	No Primary Risk Factors
TCGA-UB-A7MF	214	dead	56	MALE	G2	Stage IIIA	T3a	unknown	unknown	24.9836	White	YES	unknown	unknown	＞400	Non-Viral
TCGA-UB-AA0U	327	alive	60	MALE	G2	Stage II	T2	unknown	unknown	29.3524	White	YES	unknown	Mild	≤400	Non-Viral
TCGA-UB-AA0V	314	alive	69	FEMALE	G1	Stage I	unknown	unknown	unknown	18.6122	White	YES	unknown	Mild	≤400	Viral
TCGA-WJ-A86L	345	alive	68	FEMALE	G2	Stage I	T1	unknown	unknown	22.151	White	NO	Portal Fibrosis	None	≤400	Non-Viral
TCGA-WQ-A9G7	30	alive	71	FEMALE	G3	unknown	T3a	M0	unknown	27.993	White	NO	Portal Fibrosis	unknown	unknown	No Primary Risk Factors
TCGA-WQ-AB4B	395	alive	62	MALE	G2	Stage II	T2	M0	unknown	39.8367	White	NO	Established Cirrhosis	unknown	≤400	Viral
TCGA-WX-AA44	615	alive	64	FEMALE	G3	Stage I	T1	unknown	unknown	26.4024	White	NO	Portal Fibrosis	None	≤400	Non-Viral
TCGA-WX-AA46	756	alive	61	MALE	G1	Stage II	T2	unknown	unknown	30.8185	White	YES	unknown	None	≤400	Non-Viral
TCGA-WX-AA47	556	dead	33	FEMALE	G2	Stage IIIA	T3a	unknown	unknown	22.3214	White	NO	Established Cirrhosis	Mild	≤400	Viral
TCGA-XR-A8TC	1339	alive	43	FEMALE	G2	Stage I	T1	unknown	unknown	21.6441	White	NO	Established Cirrhosis	Mild	≤400	Viral
TCGA-XR-A8TD	1030	alive	49	FEMALE	G3	Stage IIIB	T3	M0	N0	28.3531	White	unknown	unknown	None	≤400	No Primary Risk Factors
TCGA-XR-A8TE	925	alive	16	MALE	G1	Stage IIIA	T3	unknown	N0	17.4449	White	NO	Established Cirrhosis	None	≤400	Viral
TCGA-XR-A8TF	693	dead	74	MALE	G1	Stage I	T1	unknown	unknown	20.6852	White	NO	Established Cirrhosis	None	≤400	unknown
TCGA-XR-A8TG	898	alive	58	MALE	G2	Stage I	T1	M0	unknown	20.9712	White	YES	unknown	Mild	≤400	Viral
TCGA-YA-A8S7	412	dead	68	MALE	G3	Stage IIIA	T3a	unknown	N0	27.1416	White	NO	Portal Fibrosis	Mild	≤400	unknown
TCGA-ZP-A9CV	1088	dead	59	MALE	G1	unknown	T1	unknown	unknown	19.7133	White	NO	Established Cirrhosis	Severe	≤400	Viral
TCGA-ZP-A9CY	782	alive	66	FEMALE	G1	unknown	T1	unknown	unknown	35.9245	White	YES	unknown	Mild	unknown	Non-Viral
TCGA-ZP-A9CZ	706	alive	72	MALE	G1	unknown	T1	unknown	unknown	26.1752	Asian	YES	unknown	unknown	≤400	Viral
TCGA-ZP-A9D0	1091	alive	67	FEMALE	G1	unknown	T1	unknown	unknown	28.6501	Black or African American	NO	Established Cirrhosis	Mild	unknown	Non-Viral
TCGA-ZP-A9D1	21	alive	56	FEMALE	G2	unknown	T1	unknown	unknown	44.9827	White	YES	unknown	unknown	unknown	Non-Viral
TCGA-ZP-A9D2	765	dead	51	MALE	G2	unknown	T2	unknown	unknown	25.0135	White	YES	unknown	Mild	unknown	Non-Viral
TCGA-ZP-A9D4	395	alive	64	FEMALE	G1	unknown	T1	unknown	unknown	22.8928	White	NO	Established Cirrhosis	Mild	≤400	Non-Viral
TCGA-ZS-A9CD	1386	dead	73	MALE	G2	Stage II	T2	unknown	unknown	unknown	White	unknown	unknown	Mild	unknown	Non-Viral
TCGA-ZS-A9CE	1241	alive	79	FEMALE	G1	Stage II	T2	unknown	unknown	unknown	White	unknown	unknown	None	unknown	No Primary Risk Factors
TCGA-ZS-A9CF	2412	alive	64	MALE	G2	Stage II	T2	unknown	unknown	unknown	White	unknown	unknown	None	unknown	Non-Viral
TCGA-ZS-A9CG	341	alive	55	MALE	G2	Stage II	T2	unknown	unknown	29.3374	White	unknown	unknown	Mild	unknown	No Primary Risk Factors

## Sheet: Additional file 2
ICGC_donor_id	project_code	submitted_donor_id	Gender	Status	Age	Stage	Survival_time(day)	prior_malignancy
DO50789	LIRI-JP	RK230	FEMALE	alive	73	2	570	yes
DO45245	LIRI-JP	RK138	FEMALE	deceased	75	2	240	yes
DO45193	LIRI-JP	RK072	FEMALE	deceased	68	4	120	yes
DO50803	LIRI-JP	RK243	FEMALE	alive	62	1	540	yes
DO48682	LIRI-JP	RK119	FEMALE	deceased	72	3	120	yes
DO48684	LIRI-JP	RK121	FEMALE	deceased	71	3	810	yes
DO23524	LIRI-JP	RK095	FEMALE	alive	71	2	1050	yes
DO48743	LIRI-JP	RK211	FEMALE	alive	69	2	570	yes
DO227801	LIRI-JP	RK255	FEMALE	alive	77	1	660	yes
DO48728	LIRI-JP	RK198	FEMALE	alive	74	2	150	yes
DO50842	LIRI-JP	RK287	FEMALE	alive	75	4	300	no
DO50839	LIRI-JP	RK284	FEMALE	alive	47	3	330	no
DO50837	LIRI-JP	RK283	FEMALE	alive	53	1	480	no
DO50820	LIRI-JP	RK267	FEMALE	alive	77	3	510	no
DO50827	LIRI-JP	RK275	FEMALE	alive	48	2	480	no
DO50819	LIRI-JP	RK266	FEMALE	alive	72	2	510	no
DO50799	LIRI-JP	RK236	FEMALE	alive	66	2	540	no
DO50791	LIRI-JP	RK232	FEMALE	deceased	79	1	480	no
DO50774	LIRI-JP	RK222	FEMALE	alive	68	2	720	no
DO45289	LIRI-JP	RK272	FEMALE	alive	78	3	360	no
DO45251	LIRI-JP	RK146	FEMALE	alive	57	2	900	no
DO45247	LIRI-JP	RK141	FEMALE	alive	31	2	210	no
DO45243	LIRI-JP	RK137	FEMALE	alive	74	3	930	no
DO45235	LIRI-JP	RK115	FEMALE	alive	68	1	900	no
DO45227	LIRI-JP	RK107	FEMALE	alive	57	2	1020	no
DO45221	LIRI-JP	RK100	FEMALE	deceased	75	4	390	no
DO45217	LIRI-JP	RK098	FEMALE	deceased	69	3	270	no
DO45297	LIRI-JP	RK307	FEMALE	deceased	61	4	1260	no
DO45299	LIRI-JP	RK308	FEMALE	alive	70	1	1440	no
DO45203	LIRI-JP	RK083	FEMALE	alive	71	2	1170	no
DO45205	LIRI-JP	RK084	FEMALE	deceased	67	2	90	no
DO45153	LIRI-JP	RK047	FEMALE	alive	77	2	1380	no
DO45149	LIRI-JP	RK044	FEMALE	alive	70	2	1260	no
DO45123	LIRI-JP	RK025	FEMALE	deceased	78	2	570	no
DO45117	LIRI-JP	RK022	FEMALE	deceased	73	2	1110	no
DO45107	LIRI-JP	RK016	FEMALE	alive	63	2	1710	no
DO45199	LIRI-JP	RK080	FEMALE	alive	86	2	1350	no
DO45187	LIRI-JP	RK068	FEMALE	alive	32	1	1260	no
DO45189	LIRI-JP	RK069	FEMALE	alive	85	2	1200	no
DO45183	LIRI-JP	RK066	FEMALE	deceased	72	2	570	no
DO45191	LIRI-JP	RK071	FEMALE	alive	61	2	1200	no
DO45177	LIRI-JP	RK063	FEMALE	alive	81	3	1260	no
DO45179	LIRI-JP	RK064	FEMALE	alive	78	2	600	no
DO45181	LIRI-JP	RK065	FEMALE	alive	84	2	1200	no
DO45307	LIRI-JP	RK316	FEMALE	deceased	54	4	240	no
DO45303	LIRI-JP	RK310	FEMALE	alive	62	3	990	no
DO48760	LIRI-JP	RK219	FEMALE	alive	70	2	690	no
DO48757	LIRI-JP	RK216	FEMALE	alive	68	3	480	no
DO48736	LIRI-JP	RK202	FEMALE	alive	76	1	600	no
DO48730	LIRI-JP	RK199	FEMALE	alive	73	2	630	no
DO48727	LIRI-JP	RK197	FEMALE	deceased	81	2	390	no
DO48721	LIRI-JP	RK193	FEMALE	alive	58	1	900	no
DO48720	LIRI-JP	RK191	FEMALE	alive	62	2	570	no
DO48715	LIRI-JP	RK186	FEMALE	deceased	58	2	690	no
DO48704	LIRI-JP	RK178	FEMALE	alive	68	3	750	no
DO48700	LIRI-JP	RK171	FEMALE	alive	78	2	810	no
DO48697	LIRI-JP	RK163	FEMALE	deceased	64	2	810	no
DO48692	LIRI-JP	RK144	FEMALE	alive	77	3	900	no
DO48687	LIRI-JP	RK123	FEMALE	alive	73	2	120	no
DO23552	LIRI-JP	RK172	FEMALE	alive	80	1	810	no
DO23532	LIRI-JP	RK117	FEMALE	alive	71	1	960	no
DO23531	LIRI-JP	RK116	FEMALE	alive	78	3	900	no
DO23548	LIRI-JP	RK155	FEMALE	alive	78	1	840	no
DO23511	LIRI-JP	RK040	FEMALE	deceased	83	3	180	no
DO23510	LIRI-JP	RK038	FEMALE	alive	80	2	870	no
DO23528	LIRI-JP	RK105	FEMALE	alive	45	2	1020	no
DO23522	LIRI-JP	RK090	FEMALE	alive	82	1	1320	no
DO23508	LIRI-JP	RK028	FEMALE	alive	79	2	390	no
DO45283	LIRI-JP	RK208	MALE	alive	60	3	510	yes
DO45119	LIRI-JP	RK023	MALE	deceased	74	3	510	yes
DO50793	LIRI-JP	RK233	MALE	alive	76	4	540	yes
DO23537	LIRI-JP	RK128	MALE	deceased	79	2	900	yes
DO23545	LIRI-JP	RK151	MALE	deceased	67	2	570	yes
DO23515	LIRI-JP	RK060	MALE	alive	71	2	1230	yes
DO50802	LIRI-JP	RK241	MALE	alive	49	2	930	yes
DO45161	LIRI-JP	RK051	MALE	deceased	74	2	540	yes
DO45287	LIRI-JP	RK269	MALE	alive	74	1	390	yes
DO50859	LIRI-JP	RK338	MALE	alive	77	2	180	yes
DO48672	LIRI-JP	RK059	MALE	alive	81	2	450	yes
DO48695	LIRI-JP	RK162	MALE	alive	77	2	720	yes
DO50805	LIRI-JP	RK245	MALE	alive	72	2	690	yes
DO50776	LIRI-JP	RK223	MALE	alive	75	1	690	yes
DO23539	LIRI-JP	RK134	MALE	alive	77	1	1110	yes
DO50804	LIRI-JP	RK244	MALE	alive	81	2	720	yes
DO50783	LIRI-JP	RK227	MALE	alive	62	3	480	yes
DO50808	LIRI-JP	RK257	MALE	alive	68	2	570	yes
DO45233	LIRI-JP	RK112	MALE	alive	83	3	900	yes
DO45155	LIRI-JP	RK048	MALE	alive	69	2	2160	yes
DO45115	LIRI-JP	RK021	MALE	alive	81	2	840	yes
DO48691	LIRI-JP	RK139	MALE	alive	71	2	900	no
DO50855	LIRI-JP	RK326	MALE	alive	47	2	570	no
DO50857	LIRI-JP	RK337	MALE	alive	72	2	210	no
DO50850	LIRI-JP	RK305	MALE	alive	74	3	720	no
DO50851	LIRI-JP	RK306	MALE	alive	80	2	540	no
DO50844	LIRI-JP	RK289	MALE	alive	75	4	300	no
DO50845	LIRI-JP	RK297	MALE	alive	72	3	210	no
DO50848	LIRI-JP	RK304	MALE	alive	74	3	480	no
DO50840	LIRI-JP	RK285	MALE	alive	49	2	330	no
DO50831	LIRI-JP	RK278	MALE	alive	52	2	510	no
DO50832	LIRI-JP	RK280	MALE	alive	73	3	90	no
DO50834	LIRI-JP	RK282	MALE	alive	72	2	540	no
DO50829	LIRI-JP	RK277	MALE	alive	78	3	570	no
DO50822	LIRI-JP	RK268	MALE	alive	66	2	510	no
DO50825	LIRI-JP	RK270	MALE	alive	70	2	390	no
DO50817	LIRI-JP	RK264	MALE	alive	75	2	390	no
DO50818	LIRI-JP	RK265	MALE	alive	65	2	510	no
DO50811	LIRI-JP	RK259	MALE	alive	62	1	450	no
DO50813	LIRI-JP	RK260	MALE	alive	56	2	420	no
DO50814	LIRI-JP	RK261	MALE	alive	83	3	420	no
DO50815	LIRI-JP	RK262	MALE	alive	62	3	150	no
DO50816	LIRI-JP	RK263	MALE	alive	63	2	390	no
DO50806	LIRI-JP	RK254	MALE	alive	70	4	540	no
DO50807	LIRI-JP	RK256	MALE	alive	67	1	540	no
DO50809	LIRI-JP	RK258	MALE	deceased	56	3	720	no
DO50800	LIRI-JP	RK237	MALE	alive	74	2	510	no
DO50798	LIRI-JP	RK235	MALE	deceased	77	3	30	no
DO50796	LIRI-JP	RK234	MALE	alive	69	2	540	no
DO50787	LIRI-JP	RK229	MALE	alive	63	3	480	no
DO50780	LIRI-JP	RK225	MALE	deceased	70	4	660	no
DO50785	LIRI-JP	RK228	MALE	deceased	37	4	90	no
DO50778	LIRI-JP	RK224	MALE	alive	60	4	630	no
DO50772	LIRI-JP	RK221	MALE	alive	70	1	660	no
DO45285	LIRI-JP	RK226	MALE	alive	59	3	480	no
DO45291	LIRI-JP	RK279	MALE	alive	69	3	570	no
DO45279	LIRI-JP	RK194	MALE	alive	67	3	1290	no
DO45275	LIRI-JP	RK182	MALE	deceased	65	3	10	no
DO45277	LIRI-JP	RK184	MALE	alive	64	3	600	no
DO45273	LIRI-JP	RK180	MALE	alive	62	2	480	no
DO45281	LIRI-JP	RK204	MALE	alive	83	4	750	no
DO45269	LIRI-JP	RK177	MALE	alive	59	3	750	no
DO45265	LIRI-JP	RK167	MALE	alive	73	3	1020	no
DO45267	LIRI-JP	RK170	MALE	deceased	73	3	570	no
DO45261	LIRI-JP	RK165	MALE	alive	74	3	990	no
DO45263	LIRI-JP	RK166	MALE	deceased	67	3	270	no
DO45257	LIRI-JP	RK157	MALE	alive	46	3	810	no
DO45259	LIRI-JP	RK159	MALE	alive	65	3	330	no
DO45253	LIRI-JP	RK147	MALE	alive	50	2	870	no
DO45255	LIRI-JP	RK148	MALE	alive	81	3	720	no
DO45249	LIRI-JP	RK142	MALE	alive	57	1	630	no
DO45241	LIRI-JP	RK133	MALE	alive	49	1	1080	no
DO45239	LIRI-JP	RK130	MALE	alive	42	2	870	no
DO45237	LIRI-JP	RK126	MALE	alive	58	2	900	no
DO45231	LIRI-JP	RK109	MALE	alive	84	2	930	no
DO45229	LIRI-JP	RK108	MALE	alive	74	1	990	no
DO45225	LIRI-JP	RK106	MALE	alive	69	1	1050	no
DO45223	LIRI-JP	RK103	MALE	alive	67	4	1020	no
DO45219	LIRI-JP	RK099	MALE	alive	78	2	1080	no
DO45213	LIRI-JP	RK092	MALE	alive	58	1	1200	no
DO45215	LIRI-JP	RK096	MALE	alive	65	2	1170	no
DO45211	LIRI-JP	RK091	MALE	alive	76	3	240	no
DO45293	LIRI-JP	RK298	MALE	alive	68	3	450	no
DO45295	LIRI-JP	RK303	MALE	alive	76	2	300	no
DO45207	LIRI-JP	RK086	MALE	alive	68	1	1050	no
DO45209	LIRI-JP	RK089	MALE	alive	70	4	1350	no
DO45201	LIRI-JP	RK082	MALE	alive	49	1	900	no
DO45169	LIRI-JP	RK056	MALE	alive	74	3	1350	no
DO45165	LIRI-JP	RK054	MALE	alive	75	2	690	no
DO45167	LIRI-JP	RK055	MALE	deceased	67	2	1440	no
DO45163	LIRI-JP	RK052	MALE	alive	76	2	960	no
DO45171	LIRI-JP	RK058	MALE	alive	56	3	600	no
DO45159	LIRI-JP	RK050	MALE	alive	65	3	1470	no
DO45157	LIRI-JP	RK049	MALE	alive	62	2	1980	no
DO45151	LIRI-JP	RK046	MALE	alive	64	3	1230	no
DO45147	LIRI-JP	RK042	MALE	deceased	57	2	720	no
DO45143	LIRI-JP	RK037	MALE	alive	69	3	1290	no
DO45145	LIRI-JP	RK041	MALE	deceased	78	3	60	no
DO45141	LIRI-JP	RK036	MALE	alive	73	2	1320	no
DO45137	LIRI-JP	RK034	MALE	alive	38	1	1320	no
DO45139	LIRI-JP	RK035	MALE	alive	63	3	1320	no
DO45133	LIRI-JP	RK032	MALE	deceased	64	3	660	no
DO45135	LIRI-JP	RK033	MALE	alive	77	1	1410	no
DO45131	LIRI-JP	RK031	MALE	deceased	53	4	360	no
DO45129	LIRI-JP	RK029	MALE	alive	61	3	1470	no
DO45125	LIRI-JP	RK026	MALE	alive	58	3	1680	no
DO45127	LIRI-JP	RK027	MALE	deceased	73	3	420	no
DO45121	LIRI-JP	RK024	MALE	alive	61	3	1530	no
DO45111	LIRI-JP	RK019	MALE	alive	74	2	1590	no
DO45113	LIRI-JP	RK020	MALE	alive	58	3	1560	no
DO45109	LIRI-JP	RK018	MALE	alive	63	2	1590	no
DO45103	LIRI-JP	RK014	MALE	alive	47	3	450	no
DO45105	LIRI-JP	RK015	MALE	alive	61	1	1680	no
DO45101	LIRI-JP	RK012	MALE	alive	63	2	1680	no
DO45195	LIRI-JP	RK073	MALE	alive	62	1	390	no
DO45197	LIRI-JP	RK079	MALE	alive	51	2	1170	no
DO45185	LIRI-JP	RK067	MALE	alive	89	2	600	no
DO45173	LIRI-JP	RK061	MALE	alive	63	3	1170	no
DO45175	LIRI-JP	RK062	MALE	alive	74	2	1140	no
DO227643	LIRI-JP	RK039	MALE	alive	79	2	1260	no
DO45305	LIRI-JP	RK312	MALE	alive	66	4	300	no
DO45301	LIRI-JP	RK309	MALE	deceased	56	2	1440	no
DO45309	LIRI-JP	RK317	MALE	deceased	73	3	30	no
DO48761	LIRI-JP	RK220	MALE	alive	55	2	870	no
DO48759	LIRI-JP	RK217	MALE	alive	73	3	720	no
DO48751	LIRI-JP	RK214	MALE	deceased	68	2	480	no
DO48753	LIRI-JP	RK215	MALE	alive	55	3	510	no
DO48747	LIRI-JP	RK213	MALE	alive	62	3	540	no
DO48746	LIRI-JP	RK212	MALE	alive	76	3	570	no
DO48741	LIRI-JP	RK207	MALE	alive	64	3	240	no
DO48742	LIRI-JP	RK210	MALE	alive	76	2	600	no
DO48738	LIRI-JP	RK206	MALE	alive	83	4	780	no
DO48737	LIRI-JP	RK205	MALE	alive	52	1	720	no
DO48733	LIRI-JP	RK201	MALE	alive	72	2	600	no
DO48732	LIRI-JP	RK200	MALE	alive	73	3	630	no
DO48723	LIRI-JP	RK195	MALE	alive	73	1	600	no
DO48725	LIRI-JP	RK196	MALE	alive	66	1	780	no
DO48716	LIRI-JP	RK187	MALE	alive	71	2	720	no
DO48717	LIRI-JP	RK188	MALE	deceased	54	4	180	no
DO48712	LIRI-JP	RK185	MALE	alive	50	2	810	no
DO48719	LIRI-JP	RK190	MALE	alive	80	2	690	no
DO48706	LIRI-JP	RK181	MALE	alive	72	2	870	no
DO48701	LIRI-JP	RK175	MALE	alive	78	2	780	no
DO48703	LIRI-JP	RK176	MALE	alive	64	2	750	no
DO48709	LIRI-JP	RK183	MALE	alive	74	1	900	no
DO48679	LIRI-JP	RK081	MALE	alive	72	2	1200	no
DO48674	LIRI-JP	RK070	MALE	alive	80	2	1260	no
DO48677	LIRI-JP	RK077	MALE	alive	58	3	1140	no
DO48693	LIRI-JP	RK149	MALE	alive	71	2	900	no
DO48694	LIRI-JP	RK154	MALE	alive	71	2	840	no
DO48689	LIRI-JP	RK136	MALE	alive	63	2	900	no
DO48686	LIRI-JP	RK122	MALE	alive	75	3	990	no
DO48681	LIRI-JP	RK111	MALE	alive	57	2	900	no
DO45099	LIRI-JP	RK010	MALE	alive	46	3	1590	no
DO45095	LIRI-JP	RK005	MALE	alive	66	2	1620	no
DO45096	LIRI-JP	RK006	MALE	deceased	69	2	1290	no
DO45097	LIRI-JP	RK007	MALE	alive	69	3	1620	no
DO45091	LIRI-JP	RK001	MALE	deceased	56	2	1320	no
DO45092	LIRI-JP	RK002	MALE	deceased	62	4	1200	no
DO45093	LIRI-JP	RK003	MALE	deceased	71	2	720	no
DO45094	LIRI-JP	RK004	MALE	alive	76	3	1650	no
DO23551	LIRI-JP	RK169	MALE	deceased	73	3	150	no
DO23550	LIRI-JP	RK164	MALE	alive	69	1	990	no
DO23538	LIRI-JP	RK131	MALE	alive	67	2	450	no
DO23536	LIRI-JP	RK125	MALE	alive	56	2	930	no
DO23535	LIRI-JP	RK124	MALE	alive	67	1	960	no
DO23534	LIRI-JP	RK120	MALE	alive	60	2	840	no
DO23533	LIRI-JP	RK118	MALE	alive	61	2	900	no
DO23530	LIRI-JP	RK113	MALE	deceased	53	4	180	no
DO23549	LIRI-JP	RK156	MALE	alive	74	3	990	no
DO23547	LIRI-JP	RK153	MALE	alive	74	1	1020	no
DO23546	LIRI-JP	RK152	MALE	alive	63	2	1050	no
DO23544	LIRI-JP	RK150	MALE	alive	67	2	960	no
DO23543	LIRI-JP	RK145	MALE	alive	63	2	1020	no
DO23542	LIRI-JP	RK143	MALE	alive	66	3	960	no
DO23541	LIRI-JP	RK140	MALE	alive	65	2	930	no
DO23540	LIRI-JP	RK135	MALE	alive	73	1	750	no
DO23517	LIRI-JP	RK075	MALE	alive	62	2	1200	no
DO23516	LIRI-JP	RK074	MALE	deceased	69	3	20	no
DO23514	LIRI-JP	RK057	MALE	alive	64	2	1290	no
DO23513	LIRI-JP	RK053	MALE	alive	76	3	1200	no
DO23512	LIRI-JP	RK043	MALE	alive	60	1	1260	no
DO23519	LIRI-JP	RK085	MALE	alive	65	3	630	no
DO23518	LIRI-JP	RK076	MALE	alive	67	2	1320	no
DO23527	LIRI-JP	RK104	MALE	alive	72	1	1050	no
DO23526	LIRI-JP	RK102	MALE	alive	66	3	1050	no
DO23525	LIRI-JP	RK101	MALE	alive	71	4	1050	no
DO23523	LIRI-JP	RK093	MALE	alive	52	3	1080	no
DO23521	LIRI-JP	RK088	MALE	alive	63	3	1110	no
DO23520	LIRI-JP	RK087	MALE	alive	59	4	1410	no
DO23529	LIRI-JP	RK110	MALE	alive	72	4	930	no
DO23509	LIRI-JP	RK030	MALE	deceased	60	3	780	no

## Sheet: Additional file 3
GOBP_GLYCEROLIPID_METABOLIC_P	GOBP_LIPOPROTEIN_METABOLIC_PR	GOBP_MEMBRANE_LIPID_METABOLIC	GOBP_PHOSPHOLIPID_METABOLIC_P	GOBP_REGULATION_OF_CHOLESTERO	GOBP_REGULATION_OF_PHOSPHOLIP	KEGG_GLYCEROLIPID_METABOLISM	KEGG_GLYCEROPHOSPHOLIPID_META	REACTOME_FATTY_ACID_METABOLIS	REACTOME_GLYCOSPHINGOLIPID_M	REACTOME_METABOLISM_OF_LIPID	REACTOME_PHOSPHOLIPID_METABO
AADAC	ABCA1	A3GALT2	ABCA2	ABCA2	ABCA2	AGK	ACHE	ABCC1	ARSA	AACS	ABHD3
ABCA3	ABHD10	A4GALT	ABCA3	ABCG1	ABCA3	AGPAT1	ADPRM	ABCD1	ARSB	ABCA1	ABHD4
ABHD12	ABHD12	ABCA12	ABCA8	ABCG4	ACSL3	AGPAT2	AGPAT1	ACAA1	ARSD	ABCB11	ACHE
ABHD12B	ABHD13	ABCA2	ABHD12	ACADL	ADGRF5	AGPAT3	AGPAT2	ACAA2	ARSF	ABCB4	ACP6
ABHD16A	ABHD17A	ABCA8	ABHD12B	ACADVL	APOC1	AGPAT4	AGPAT3	ACACA	ARSG	ABCC1	AGK
ABHD16B	ABHD17B	ACER1	ABHD16A	APOA1	APOC2	AKR1A1	AGPAT4	ACACB	ARSH	ABCC3	AGPAT1
ABHD2	ABHD17C	ACER2	ABHD16B	APOB	CAPN2	AKR1B1	CDIPT	ACAD10	ARSI	ABCD1	AGPAT2
ABHD3	ALOX12B	ACER3	ABHD3	APOE	CHP1	ALDH1B1	CDS1	ACAD11	ARSJ	ABHD3	AGPAT3
ABHD4	ANGPTL8	AGK	ABHD4	AQP8	CHRM5	ALDH2	CDS2	ACADL	ARSK	ABHD4	AGPAT4
ABHD5	APOA1	AGMO	ABHD5	ARV1	DNAJC19	ALDH3A2	CHAT	ACADM	ARSL	ABHD5	AGPAT5
ABHD6	APOA2	ALDH3B1	ABHD6	CES1	ENPP7	ALDH7A1	CHKA	ACADS	ASAH1	ACAA1	ALPI
ACP6	APOB	ALDH3B2	ACP6	CYP7A1	FABP3	ALDH9A1	CHKB	ACADVL	ASAH2	ACAA2	ARF1
ACSL1	APOBEC1	ALOX12B	ACSL3	DGAT2	GNB3	AWAT2	CHPT1	ACBD4	B3GALNT1	ACACA	ARF3
ACSL3	APOC1	ALOXE3	ADGRF5	DGKQ	HTR2A	CEL	CRLS1	ACBD5	B4GALNT1	ACACB	AWAT2
AGK	APOC3	ARV1	AGPAT1	DHCR7	HTR2B	DGAT1	DGKA	ACBD6	CERK	ACAD10	BCHE
AGMO	APOD	ASAH1	AGPAT2	EPHX2	HTR2C	DGAT2	DGKB	ACBD7	CPTP	ACAD11	BMX
AGPAT1	APOE	ASAH2	AGPAT3	ERLIN1	IDH1	DGKA	DGKD	ACLY	CTSA	ACADL	CDIPT
AGPAT2	APOL1	B3GALNT1	AGPAT4	ERLIN2	LDLR	DGKB	DGKE	ACOT1	ENPP7	ACADM	CDS1
AGPAT3	APOL2	B3GALT1	AGPAT5	FGF1	LPCAT1	DGKD	DGKG	ACOT11	ESYT1	ACADS	CDS2
AGPAT4	APOL3	B3GALT2	AJUBA	FMO5	LPIN1	DGKE	DGKH	ACOT12	ESYT2	ACADVL	CEPT1
AGPAT5	APOL4	B3GALT4	ALOX15	GNB3	MFSD2A	DGKG	DGKI	ACOT13	ESYT3	ACAT1	CHAT
AJUBA	APOL5	B3GNT5	ALOX15B	LDLR	MIR30C1	DGKH	DGKQ	ACOT2	GALC	ACAT2	CHKA
ALOX15	APOL6	B4GALNT1	ANGPTL3	LDLRAP1	MTMR1	DGKI	DGKZ	ACOT4	GBA1	ACBD4	CHKB
ANG	APOLD1	B4GALT3	APOA1	LPCAT3	MTMR2	DGKQ	ETNK1	ACOT6	GBA2	ACBD5	CHPT1
APOA1	APOM	B4GALT4	APOA2	MBTPS1	MTMR3	DGKZ	ETNK2	ACOT7	GLA	ACBD6	CPNE1
APOA2	ATG10	B4GALT5	APOA4	MBTPS2	MTMR4	GK	GNPAT	ACOT8	GLB1	ACBD7	CPNE3
APOA4	ATG101	B4GALT6	APOC1	MIR182	MTMR9	GK2	GPAM	ACOT9	GLB1L	ACER1	CPNE6
APOA5	ATG12	BAX	APOC2	MIR185	NR1H4	GLA	GPAT2	ACOX1	GLTP	ACER2	CPNE7
APOB	ATG13	C20orf173	ATG14	MIR30C1	PDGFA	GLYCTK	GPAT3	ACOX2	GM2A	ACER3	CRLS1
APOBEC1	ATG16L1	CCN1	ATM	MIR548P	PDGFB	GPAM	GPAT4	ACOX3	HEXA	ACHE	CSNK2A1
APOBR	ATG16L2	CEL	BECN1	MIR96	PHB2	GPAT2	GPD1	ACOXL	HEXB	ACLY	CSNK2A2
APOC1	ATG5	CERK	BMX	NR1H4	PRKCD	GPAT3	GPD1L	ACSBG1	NEU1	ACOT1	CSNK2B
APOC2	ATG7	CERKL	BPNT1	POR	RAB38	GPAT4	GPD2	ACSBG2	NEU2	ACOT11	DDHD1
APOC3	ATM	CERS1	BPNT2	PRKAA1	SCARB1	LCLAT1	JMJD7-PLA2G4B	ACSF2	NEU3	ACOT12	DDHD2
APOE	CLIP3	CERS2	CAPN2	SCAP	SLC27A1	LIPC	LCAT	ACSF3	NEU4	ACOT13	DGAT1
APOH	CTSD	CERS3	CDIPT	SEC14L2	TAFAZZIN	LIPF	LCLAT1	ACSL1	PSAP	ACOT2	DGAT2
ATG14	CWH43	CERS4	CDS1	SERPINA12		LIPG	LPCAT1	ACSL3	SMPD1	ACOT4	DGAT2L6
ATM	DBI	CERS5	CDS2	SOD1		LPL	LPCAT2	ACSL4	SMPD2	ACOT6	ENPP6
AVIL	DGAT2	CERS6	CEPT1	SREBF1		MBOAT1	LPCAT3	ACSL5	SMPD3	ACOT7	ETNK1
AWAT2	DPM1	CERT1	CETP	STARD4		MBOAT2	LPCAT4	ACSL6	SMPD4	ACOT8	ETNK2
BECN1	DPM2	CLN6	CHAT	TTC39B		MGLL	LPGAT1	ACSM3	STS	ACOT9	ETNPPL
BMX	DPM3	CLN8	CHKA			PLPP1	LYPLA1	ACSM6	SUMF1	ACOX1	FIG4
BPNT1	GBA1	CPTP	CHKB			PLPP2	LYPLA2	AKR1C3	SUMF2	ACOX2	GDE1
BPNT2	GLUL	CREM	CHP1			PLPP3	MBOAT1	ALDH3A2	UGCG	ACOX3	GDPD1
C3	GOLGA7	CSNK1G2	CHPT1			PNLIP	MBOAT2	ALOX12	UGT8	ACOXL	GDPD3
CAPN2	GOLGA7B	CWH43	CHRM5			PNLIPRP1	MBOAT7	ALOX12B		ACP6	GDPD5
CAT	GPAA1	CYP1B1	CISH			PNLIPRP2	PCYT1A	ALOX15		ACSBG1	GNPAT
CAV1	GPLD1	CYP4F22	CLN3			PNPLA3	PCYT1B	ALOX15B		ACSBG2	GPAM
CAV3	HHAT	DEGS1	CLN8			TKFC	PCYT2	ALOX5		ACSF2	GPAT2
CDIPT	HHATL	DEGS2	CRLS1				PEMT	ALOX5AP		ACSF3	GPAT3
CDS1	IRGM	DPM1	CSF1R				PGS1	ALOXE3		ACSL1	GPAT4
CDS2	ITGAV	DPM2	CWH43				PHOSPHO1	AMACR		ACSL3	GPCPD1
CEPT1	ITGB3	DPM3	CYP2W1				PISD	AWAT1		ACSL4	GPD1
CETP	LCAT	ELOVL1	DBI				PLA2G10	CBR1		ACSL5	GPD1L
CHAT	LDLR	ELOVL2	DGKA				PLA2G12A	CBR4		ACSL6	GPD2
CHKA	LEP	ELOVL3	DGKB				PLA2G12B	CPT1A		ACSM3	HADHA
CHKB	LIPG	ELOVL4	DGKD				PLA2G15	CPT1B		ACSM6	HADHB
CHPT1	LYPLA1	ELOVL5	DGKE				PLA2G1B	CPT2		ACSS3	INPP4A
CHRM5	LYPLA2	ELOVL6	DGKG				PLA2G2A	CRAT		AGK	INPP4B
CISH	LYPLAL1	ELOVL7	DGKH				PLA2G2C	CROT		AGMO	INPP5D
CLN3	MAP6D1	ENPP2	DGKQ				PLA2G2D	CYP1A1		AGPAT1	INPP5E
CNEP1R1	MBOAT4	ENPP7	DGKZ				PLA2G2E	CYP1A2		AGPAT2	INPP5F
CPS1	MPPE1	FA2H	DHDDS				PLA2G2F	CYP1B1		AGPAT3	INPP5J
CPT1A	MTTP	FADS3	DHRS7B				PLA2G3	CYP2C19		AGPAT4	INPP5K
CRLS1	NMT1	FUCA1	DNAJC19				PLA2G4A	CYP2C8		AGPAT5	INPPL1
CSF1R	NMT2	FUT2	DOLK				PLA2G4B	CYP2C9		AGPS	LCLAT1
CTDNEP1	NOTUM	FUT3	DOLPP1				PLA2G4E	CYP2J2		AGT	LIPH
CWH43	NPC1L1	FUT5	DPM1				PLA2G5	CYP2U1		AHR	LIPI
CYP2E1	OLR1	FUT6	DPM2				PLA2G6	CYP4A11		AKR1B1	LPCAT1
DAGLA	PCSK9	FUT7	DPM3				PLD1	CYP4A22		AKR1B15	LPCAT2
DAGLB	PGAP1	FUT9	EFR3A				PLD2	CYP4B1		AKR1C1	LPCAT3
DBI	PGAP2	GAL3ST1	EFR3B				PLPP1	CYP4F11		AKR1C2	LPCAT4
DDHD2	PGAP3	GAL3ST2	ENPP2				PLPP2	CYP4F2		AKR1C3	LPGAT1
DGAT1	PGAP4	GAL3ST3	ENPP6				PLPP3	CYP4F22		AKR1C4	LPIN1
DGAT2	PIGA	GAL3ST4	ENPP7				PTDSS1	CYP4F3		AKR1D1	LPIN2
DGAT2L6	PIGB	GALC	ETNK1				PTDSS2	CYP4F8		ALAS1	LPIN3
DGKA	PIGC	GBA1	ETNK2				TAFAZZIN	CYP8B1		ALB	MBOAT1
DGKB	PIGF	GBA2	FABP3					DBI		ALDH3A2	MBOAT2
DGKD	PIGG	GBA3	FABP5					DECR1		ALDH3B1	MBOAT7
DGKE	PIGH	GBGT1	FADS1					DECR2		ALDH3B2	MFSD2A
DGKG	PIGK	GLA	FAR1					DPEP1		ALOX12	MGLL
DGKH	PIGL	GLB1	FDFT1					DPEP2		ALOX12B	MIGA1
DGKI	PIGM	GLTP	FDPS					DPEP3		ALOX15	MIGA2
DGKK	PIGN	GM2A	FGF2					ECHS1		ALOX15B	MTM1
DGKQ	PIGO	GPAA1	FIG4					ECI1		ALOX5	MTMR1
DGKZ	PIGP	GPLD1	FITM1					ECI2		ALOX5AP	MTMR10
DHRS7B	PIGQ	HACD1	FITM2					EHHADH		ALOXE3	MTMR12
DNAJC19	PIGS	HACD2	GALR2					ELOVL1		ALPI	MTMR14
DPM1	PIGT	HACD3	GATA6					ELOVL2		AMACR	MTMR2
DPM2	PIGU	HACD4	GDE1					ELOVL3		ANGPTL4	MTMR3
DPM3	PIGV	HEXA	GDPD1					ELOVL4		ANKRD1	MTMR4
EFR3A	PIGW	HEXB	GDPD3					ELOVL5		APOA1	MTMR6
EFR3B	PIGX	HTRA2	GGPS1					ELOVL6		APOA2	MTMR7
ENPP2	PIGY	ITGB8	GNB3					ELOVL7		APOA5	MTMR8
ENPP6	PIGZ	KDSR	GNPAT					EPHX2		ARF1	MTMR9
ETNK1	PIK3C3	KIT	GPAA1					FAAH		ARF3	OCRL
ETNK2	PORCN	LARGE1	GPAM					FAAH2		ARNT	OSBPL10
FAAH	PPARA	LCT	GPAT2					FADS1		ARNT2	OSBPL5
FABP3	PPM1A	MGST2	GPAT3					FADS2		ARSA	OSBPL8
FABP5	PPM1B	MPPE1	GPAT4					FASN		ARSB	PCTP
FAR1	PPT1	NAAA	GPCPD1					GGT1		ARSD	PCYT1A
FBXW7	RAB3GAP1	NAGA	GPLD1					GGT5		ARSF	PCYT1B
FGF2	RAB3GAP2	NEU1	GPX4					GPX1		ARSG	PCYT2
FGF21	RABL3	NEU2	HADHA					GPX2		ARSH	PEMT
FIG4	RB1CC1	NEU3	HDHD5					GPX4		ARSI	PGS1
FITM2	SAMD1	NEU4	HEXB					HACD1		ARSJ	PHOSPHO1
G6PC1	SELENOK	NSMAF	HMGCS1					HACD2		ARSK	PI4K2A
GAL3ST1	SLC30A5	ORMDL1	HMGCS2					HACD3		ARSL	PI4K2B
GALR2	SVIP	ORMDL2	HTR2A					HACD4		ARV1	PI4KA
GDE1	UGCG	ORMDL3	HTR2B					HACL1		ASAH1	PI4KB
GDPD1	ULK1	OSBP	HTR2C					HADH		ASAH2	PIK3C2A
GDPD3	WDR45	P2RX1	HYCC1					HADHA		AWAT1	PIK3C2B
GK	WDR45B	P2RX7	HYCC2					HADHB		AWAT2	PIK3C2G
GK2	WIPI1	PEMT	IDH1					HAO2		B3GALNT1	PIK3C3
GK5	WIPI2	PGAP1	IDI1					HPGD		B4GALNT1	PIK3CA
GNB3	ZDHHC1	PGAP2	IDI2					HPGDS		BAAT	PIK3CB
GNPAT	ZDHHC11	PGAP3	IMPA1					HSD17B12		BCHE	PIK3CD
GPAA1	ZDHHC11B	PGAP4	IMPA2					HSD17B3		BDH1	PIK3CG
GPAM	ZDHHC12	PIGA	INPP1					HSD17B4		BDH2	PIK3R1
GPAT2	ZDHHC13	PIGB	INPP4A					HSD17B8		BMAL1	PIK3R2
GPAT3	ZDHHC14	PIGC	INPP4B					HTD2		BMX	PIK3R3
GPAT4	ZDHHC15	PIGF	INPP5A					LTA4H		CARM1	PIK3R4
GPCPD1	ZDHHC16	PIGG	INPP5B					LTC4S		CAV1	PIK3R5
GPD1	ZDHHC17	PIGH	INPP5D					MAPKAPK2		CBR1	PIK3R6
GPIHBP1	ZDHHC18	PIGK	INPP5E					MCAT		CBR4	PIKFYVE
GPLD1	ZDHHC19	PIGL	INPP5F					MCEE		CCNC	PIP4K2A
GPX1	ZDHHC2	PIGM	INPP5J					MECR		CD36	PIP4K2B
HADHA	ZDHHC20	PIGN	INPP5K					MID1IP1		CDIPT	PIP4K2C
HDHD5	ZDHHC21	PIGO	INPPL1					MLYCD		CDK19	PIP4P1
HTR2A	ZDHHC22	PIGP	IP6K1					MMAA		CDK8	PIP5K1A
HTR2B	ZDHHC23	PIGQ	IP6K2					MMUT		CDS1	PIP5K1B
HTR2C	ZDHHC24	PIGS	IP6K3					MORC2		CDS2	PIP5K1C
HYCC1	ZDHHC3	PIGT	IPMK					NDUFAB1		CEPT1	PISD
HYCC2	ZDHHC4	PIGU	ISYNA1					NUDT19		CERK	PITPNB
IMPA1	ZDHHC5	PIGV	ITPKA					NUDT7		CERS1	PITPNM1
IMPA2	ZDHHC6	PIGW	ITPKB					OLAH		CERS2	PITPNM2
INPP1	ZDHHC7	PIGX	ITPKC					PCCA		CERS3	PITPNM3
INPP4A	ZDHHC8	PIGY	LCAT					PCCB		CERS4	PLA1A
INPP4B	ZDHHC9	PIGZ	LCLAT1					PCTP		CERS5	PLA2G10
INPP5A		PLA2G15	LDLR					PECR		CERS6	PLA2G12A
INPP5B		PLA2G6	LGALS13					PHYH		CERT1	PLA2G15
INPP5D		PLPP1	LIPC					PLA2G4A		CGA	PLA2G1B
INPP5E		PLPP2	LIPG					PON1		CH25H	PLA2G2A
INPP5F		PLPP3	LIPH					PON2		CHAT	PLA2G2D
INPP5J		PNLIPRP2	LIPI					PON3		CHD9	PLA2G2E
INPP5K		PNPLA1	LPCAT1					PPARD		CHKA	PLA2G2F
INPPL1		PPM1L	LPCAT2					PPT1		CHKB	PLA2G3
INSIG1		PPP2CA	LPCAT3					PPT2		CHPT1	PLA2G4A
INSIG2		PPP2R1A	LPCAT4					PRKAA2		CIDEA	PLA2G4B
IP6K1		PPT1	LPGAT1					PRKAB2		CIDEC	PLA2G4C
IP6K2		PRKAA1	LPIN1					PRKAG2		CLOCK	PLA2G4D
IP6K3		PRKCD	LPL					PRXL2B		CPNE1	PLA2G4E
IPMK		PRKD1	MBOAT1					PTGDS		CPNE3	PLA2G4F
ITPKA		PRKD2	MBOAT2					PTGES		CPNE6	PLA2G5
ITPKB		PRKD3	MBOAT7					PTGES2		CPNE7	PLA2G6
ITPKC		PSAP	MECP2					PTGES3		CPT1A	PLA2R1
KAT5		PSAPL1	MFSD2A					PTGIS		CPT1B	PLAAT1
LCAT		SAMD8	MIR30C1					PTGR1		CPT2	PLAAT2
LCLAT1		SCCPDH	MPPE1					PTGR2		CPTP	PLAAT3
LDLR		SERINC1	MTM1					PTGS1		CRAT	PLAAT4
LIPC		SFTPB	MTMR1					PTGS2		CREBBP	PLAAT5
LIPE		SGMS1	MTMR14					RXRA		CRLS1	PLB1
LIPF		SGMS2	MTMR2					SCD		CROT	PLBD1
LIPH		SGPL1	MTMR3					SCD5		CSNK1G2	PLD1
LIPI		SGPP1	MTMR4					SCP2		CSNK2A1	PLD2
LMF1		SGPP2	MTMR6					SLC22A5		CSNK2A2	PLD3
LPCAT1		SIRT3	MTMR7					SLC25A1		CSNK2B	PLD4
LPCAT2		SLC30A5	MTMR9					SLC25A17		CTSA	PLD6
LPCAT3		SMPD1	MVD					SLC25A20		CUBN	PLEKHA1
LPCAT4		SMPD2	MVK					SLC27A2		CYP11A1	PLEKHA2
LPGAT1		SMPD3	NAAA					SLC27A3		CYP11B1	PLEKHA3
LPIN1		SMPD4	NAPEPLD					TBXAS1		CYP11B2	PLEKHA4
LPIN2		SMPDL3A	NKX2-1					TECR		CYP17A1	PLEKHA5
LPIN3		SMPDL3B	NR1H2					TECRL		CYP19A1	PLEKHA6
LPL		SPHK1	NR1H3					THEM4		CYP1A1	PLEKHA8
LYPLA2		SPHK2	NR1H4					THEM5		CYP1A2	PNPLA2
MBOAT1		SPNS2	NUS1					THRSP		CYP1B1	PNPLA3
MBOAT2		SPTLC1	OC90							CYP21A2	PNPLA6
MBOAT7		SPTLC2	OCRL							CYP24A1	PNPLA7
MECP2		SPTLC3	ORMDL1							CYP27A1	PNPLA8
MFSD2A		SPTSSA	ORMDL3							CYP27B1	PTDSS1
MGLL		SPTSSB	OSBP							CYP2C19	PTDSS2
MIR29B1		ST3GAL1	OSBPL10							CYP2C8	PTEN
MIR30C1		ST3GAL2	OSBPL5							CYP2C9	PTPMT1
MIR548P		ST3GAL3	OSBPL8							CYP2D6	PTPN13
MOGAT1		ST3GAL4	P3R3URF							CYP2E1	RAB14
MOGAT2		ST3GAL5	PAFAH1B1							CYP2J2	RAB4A
MOGAT3		ST3GAL6	PCSK9							CYP2R1	RAB5A
MPPE1		ST6GALNAC3	PCYT1A							CYP2U1	RUFY1
MTM1		ST6GALNAC4	PCYT1B							CYP39A1	SACM1L
MTMR1		ST6GALNAC5	PCYT2							CYP3A4	SBF1
MTMR14		ST6GALNAC6	PDGFA							CYP46A1	SBF2
MTMR2		ST8SIA1	PDGFB							CYP4A11	SELENOI
MTMR3		ST8SIA2	PDGFRB							CYP4A22	SLC44A1
MTMR4		ST8SIA3	PEMT							CYP4B1	SLC44A2
MTMR6		ST8SIA4	PGAP1							CYP4F11	SLC44A3
MTMR7		ST8SIA5	PGAP2							CYP4F2	SLC44A4
MTMR9		ST8SIA6	PGAP3							CYP4F22	SLC44A5
MTTP		SUMF1	PGAP4							CYP4F3	STARD10
NAAA		TECR	PGP							CYP4F8	STARD7
NAPEPLD		TEX2	PGS1							CYP51A1	SYNJ1
NKX2-3		TH	PHB2							CYP7A1	SYNJ2
NR1H2		TLCD3B	PI4K2A							CYP7B1	TAFAZZIN
NR1H3		TM9SF2	PI4K2B							CYP8B1	TMEM86B
NR1H4		UGCG	PI4KA							DBI	TNFAIP8
OC90		UGT8	PI4KB							DDHD1	TNFAIP8L1
OCRL		VAPA	PIGA							DDHD2	TNFAIP8L2
OSBPL10		VPS54	PIGB							DECR1	TNFAIP8L3
OSBPL5		ZPBP2	PIGC							DECR2	TPTE
OSBPL8			PIGF							DEGS1	TPTE2
P3R3URF			PIGG							DEGS2	VAC14
PAFAH1B1			PIGH							DGAT1
PANK2			PIGK							DGAT2
PCK1			PIGL							DGAT2L6
PCK2			PIGM							DHCR24
PCSK9			PIGN							DHCR7
PCYT1A			PIGO							DHRS7B
PCYT1B			PIGP							DPEP1
PCYT2			PIGQ							DPEP2
PDGFA			PIGS							DPEP3
PDGFB			PIGT							EBP
PDGFRB			PIGU							ECHS1
PEMT			PIGV							ECI1
PGAP1			PIGW							ECI2
PGAP2			PIGX							EHHADH
PGAP3			PIGY							ELOVL1
PGAP4			PIGZ							ELOVL2
PGP			PIK3C2A							ELOVL3
PGS1			PIK3C2B							ELOVL4
PHB2			PIK3C2G							ELOVL5
PI4K2A			PIK3C3							ELOVL6
PI4K2B			PIK3CA							ELOVL7
PI4KA			PIK3CB							ENPP6
PI4KB			PIK3CD							ENPP7
PIGA			PIK3CG							EP300
PIGB			PIK3R1							EPHX2
PIGC			PIK3R2							ESRRA
PIGF			PIK3R3							ESYT1
PIGG			PIK3R4							ESYT2
PIGH			PIK3R6							ESYT3
PIGK			PIKFYVE							ETNK1
PIGL			PIP4K2A							ETNK2
PIGM			PIP4K2B							ETNPPL
PIGN			PIP4K2C							FA2H
PIGO			PIP4P1							FAAH
PIGP			PIP4P2							FAAH2
PIGQ			PIP5K1A							FABP1
PIGS			PIP5K1B							FABP12
PIGT			PIP5K1C							FABP2
PIGU			PISD							FABP3
PIGV			PITPNM1							FABP4
PIGW			PITPNM2							FABP5
PIGX			PITPNM3							FABP6
PIGY			PLA1A							FABP7
PIGZ			PLA2G10							FABP9
PIK3C2A			PLA2G12A							FADS1
PIK3C2B			PLA2G12B							FADS2
PIK3C2G			PLA2G15							FAM120B
PIK3C3			PLA2G1B							FAR1
PIK3CA			PLA2G2A							FAR2
PIK3CB			PLA2G2C							FASN
PIK3CD			PLA2G2D							FDFT1
PIK3CG			PLA2G2E							FDPS
PIK3R1			PLA2G2F							FDX1
PIK3R2			PLA2G3							FDX2
PIK3R3			PLA2G4A							FDXR
PIK3R4			PLA2G4B							FHL2
PIK3R6			PLA2G4C							FIG4
PIKFYVE			PLA2G4D							FITM1
PIP4K2A			PLA2G4E							FITM2
PIP4K2B			PLA2G4F							G0S2
PIP4K2C			PLA2G5							GALC
PIP4P1			PLA2G6							GBA1
PIP4P2			PLA2G7							GBA2
PIP5K1A			PLAA							GC
PIP5K1B			PLAAT1							GDE1
PIP5K1C			PLAAT2							GDPD1
PISD			PLAAT3							GDPD3
PITPNM1			PLAAT4							GDPD5
PITPNM2			PLAAT5							GGPS1
PITPNM3			PLB1							GGT1
PLA1A			PLBD1							GGT5
PLA2G10			PLBD2							GK
PLA2G15			PLCB1							GK2
PLA2G1B			PLCB2							GK3P
PLA2G2A			PLCB3							GLA
PLA2G2C			PLCD1							GLB1
PLA2G2D			PLCG1							GLB1L
PLA2G2E			PLCG2							GLIPR1
PLA2G2F			PLCH2							GLTP
PLA2G3			PLD1							GM2A
PLA2G4A			PLD2							GNPAT
PLA2G4B			PLEK							GPAM
PLA2G4C			PLPP1							GPAT2
PLA2G4D			PLPP2							GPAT3
PLA2G4E			PLPP3							GPAT4
PLA2G4F			PLPP4							GPCPD1
PLA2G5			PLPP5							GPD1
PLA2G6			PLPP6							GPD1L
PLA2G7			PLPPR1							GPD2
PLAAT1			PLPPR2							GPS2
PLAAT2			PLPPR3							GPX1
PLAAT3			PLPPR4							GPX2
PLAAT4			PLPPR5							GPX4
PLAAT5			PLSCR1							GRHL1
PLB1			PLSCR3							GSTM4
PLCB1			PMVK							HACD1
PLCB2			PNLIPRP2							HACD2
PLCB3			PNPLA3							HACD3
PLCD1			PNPLA6							HACD4
PLCE1			PNPLA7							HACL1
PLCG1			PNPLA8							HADH
PLCG2			PON1							HADHA
PLCH2			PPARD							HADHB
PLD1			PRDX6							HAO2
PLD2			PRKCD							HDAC3
PLEK			PROCA1							HELZ2
PLIN5			PTDSS1							HEXA
PLSCR1			PTDSS2							HEXB
PLSCR3			PTEN							HILPDA
PNLIPRP2			PTPMT1							HMGCL
PNPLA1			RAB38							HMGCLL1
PNPLA2			SACM1L							HMGCR
PNPLA3			SAMD8							HMGCS1
PNPLA4			SCARB1							HMGCS2
PNPLA5			SELENOI							HPGD
PNPLA6			SERAC1							HPGDS
PNPLA7			SERINC1							HSD11B1
PNPLA8			SERINC4							HSD11B2
PON1			SERINC5							HSD17B1
PRDX6			SGMS1							HSD17B11
PTDSS1			SGMS2							HSD17B12
PTDSS2			SGPP1							HSD17B13
PTEN			SH3YL1							HSD17B14
PTPMT1			SLA2							HSD17B2
PTPN11			SLC27A1							HSD17B3
RAB38			SLC30A5							HSD17B4
RGN			SLC44A1							HSD17B7
SACM1L			SLC44A2							HSD17B8
SCARB1			SLC44A3							HSD3B1
SEL1L			SLC44A4							HSD3B2
SELENOI			SLC44A5							HSD3B7
SERAC1			SMG1							HTD2
SERINC1			SMPD1							IDI1
SERINC5			SMPD2							IDI2
SERPINA12			SMPD3							INPP4A
SH3YL1			SMPD4							INPP4B
SIK1			SMPDL3A							INPP5D
SIRT1			SMPDL3B							INPP5E
SLA2			SNCA							INPP5F
SLC22A4			SOCS1							INPP5J
SLC27A1			SOCS2							INPP5K
SLC27A5			SOCS3							INPPL1
SLC30A5			SOCS4							INSIG1
SLC44A1			SOCS5							INSIG2
SLC44A2			SOCS6							KDSR
SLC44A3			SOCS7							KPNB1
SLC44A4			SPHK2							LBR
SLC44A5			SPTLC1							LCLAT1
SMG1			SPTLC2							LDLRAP1
SMPD4			SRD5A3							LGMN
SOCS1			SYNJ1							LHB
SOCS2			SYNJ2							LIPE
SOCS3			TAFAZZIN							LIPH
SOCS4			TAMM41							LIPI
SOCS5			THEM5							LPCAT1
SOCS6			TMEM150A							LPCAT2
SOCS7			TMEM38B							LPCAT3
SORL1			TMEM86B							LPCAT4
SREBF1			TNFAIP8L3							LPGAT1
SYNJ1			TPTE2							LPIN1
SYNJ2			TTC7A							LPIN2
TAFAZZIN			TTC7B							LPIN3
TAMM41			UVRAG							LRP2
TBL1XR1			VAC14							LSS
THEM5			VAPA							LTA4H
THRSP										LTC4S
TMEM150A										MAPKAPK2
TMEM86B										MBOAT1
TNXB										MBOAT2
TPTE2										MBOAT7
TTC7A										MBTPS1
TTC7B										MBTPS2
UVRAG										MCAT
VAC14										MCEE
										ME1
										MECR
										MED1
										MED10
										MED11
										MED12
										MED13
										MED13L
										MED14
										MED15
										MED16
										MED17
										MED18
										MED19
										MED20
										MED21
										MED22
										MED23
										MED24
										MED25
										MED26
										MED27
										MED28
										MED29
										MED30
										MED31
										MED4
										MED6
										MED7
										MED8
										MED9
										MFSD2A
										MGLL
										MID1IP1
										MIGA1
										MIGA2
										MLYCD
										MMAA
										MMUT
										MOGAT1
										MOGAT2
										MOGAT3
										MORC2
										MSMO1
										MTF1
										MTM1
										MTMR1
										MTMR10
										MTMR12
										MTMR14
										MTMR2
										MTMR3
										MTMR4
										MTMR6
										MTMR7
										MTMR8
										MTMR9
										MVD
										MVK
										NCOA1
										NCOA2
										NCOA3
										NCOA6
										NCOR1
										NCOR2
										NDUFAB1
										NEU1
										NEU2
										NEU3
										NEU4
										NFYA
										NFYB
										NFYC
										NPAS2
										NR1D1
										NR1H2
										NR1H3
										NR1H4
										NRF1
										NSDHL
										NUDT19
										NUDT7
										OCRL
										OLAH
										ORMDL1
										ORMDL2
										ORMDL3
										OSBP
										OSBPL10
										OSBPL1A
										OSBPL2
										OSBPL3
										OSBPL5
										OSBPL6
										OSBPL7
										OSBPL8
										OSBPL9
										OXCT1
										OXCT2
										PCCA
										PCCB
										PCTP
										PCYT1A
										PCYT1B
										PCYT2
										PECR
										PEMT
										PEX11A
										PGS1
										PHOSPHO1
										PHYH
										PI4K2A
										PI4K2B
										PI4KA
										PI4KB
										PIAS4
										PIK3C2A
										PIK3C2B
										PIK3C2G
										PIK3C3
										PIK3CA
										PIK3CB
										PIK3CD
										PIK3CG
										PIK3R1
										PIK3R2
										PIK3R3
										PIK3R4
										PIK3R5
										PIK3R6
										PIKFYVE
										PIP4K2A
										PIP4K2B
										PIP4K2C
										PIP4P1
										PIP5K1A
										PIP5K1B
										PIP5K1C
										PISD
										PITPNB
										PITPNM1
										PITPNM2
										PITPNM3
										PLA1A
										PLA2G10
										PLA2G12A
										PLA2G15
										PLA2G1B
										PLA2G2A
										PLA2G2D
										PLA2G2E
										PLA2G2F
										PLA2G3
										PLA2G4A
										PLA2G4B
										PLA2G4C
										PLA2G4D
										PLA2G4E
										PLA2G4F
										PLA2G5
										PLA2G6
										PLA2R1
										PLAAT1
										PLAAT2
										PLAAT3
										PLAAT4
										PLAAT5
										PLB1
										PLBD1
										PLD1
										PLD2
										PLD3
										PLD4
										PLD6
										PLEKHA1
										PLEKHA2
										PLEKHA3
										PLEKHA4
										PLEKHA5
										PLEKHA6
										PLEKHA8
										PLIN1
										PLIN2
										PLIN3
										PLPP1
										PLPP2
										PLPP3
										PLPP6
										PMVK
										PNPLA2
										PNPLA3
										PNPLA4
										PNPLA5
										PNPLA6
										PNPLA7
										PNPLA8
										POMC
										PON1
										PON2
										PON3
										PPARA
										PPARD
										PPARG
										PPARGC1A
										PPARGC1B
										PPM1L
										PPP1CA
										PPP1CB
										PPP1CC
										PPT1
										PPT2
										PRKAA2
										PRKAB2
										PRKACA
										PRKACB
										PRKACG
										PRKAG2
										PRKD1
										PRKD2
										PRKD3
										PRXL2B
										PSAP
										PTDSS1
										PTDSS2
										PTEN
										PTGDS
										PTGES
										PTGES2
										PTGES3
										PTGIS
										PTGR1
										PTGR2
										PTGS1
										PTGS2
										PTPMT1
										PTPN13
										RAB14
										RAB4A
										RAB5A
										RAN
										RGL1
										RORA
										RUFY1
										RXRA
										RXRB
										SACM1L
										SAMD8
										SAR1B
										SBF1
										SBF2
										SC5D
										SCAP
										SCD
										SCD5
										SCP2
										SEC23A
										SEC24A
										SEC24B
										SEC24C
										SEC24D
										SELENOI
										SERPINA6
										SGMS1
										SGMS2
										SGPL1
										SGPP1
										SGPP2
										SIN3A
										SIN3B
										SLC10A1
										SLC10A2
										SLC22A5
										SLC25A1
										SLC25A17
										SLC25A20
										SLC27A1
										SLC27A2
										SLC27A3
										SLC27A5
										SLC44A1
										SLC44A2
										SLC44A3
										SLC44A4
										SLC44A5
										SLC51A
										SLC51B
										SLCO1A2
										SLCO1B1
										SLCO1B3
										SMARCD3
										SMPD1
										SMPD2
										SMPD3
										SMPD4
										SP1
										SPHK1
										SPHK2
										SPNS2
										SPTLC1
										SPTLC2
										SPTLC3
										SPTSSA
										SPTSSB
										SQLE
										SRD5A1
										SRD5A2
										SRD5A3
										SREBF1
										SREBF2
										STAR
										STARD10
										STARD3
										STARD3NL
										STARD4
										STARD5
										STARD6
										STARD7
										STS
										SULT2A1
										SUMF1
										SUMF2
										SUMO2
										SYNJ1
										SYNJ2
										TAFAZZIN
										TBL1X
										TBL1XR1
										TBXAS1
										TECR
										TECRL
										TGS1
										THEM4
										THEM5
										THRAP3
										THRSP
										TIAM2
										TM7SF2
										TMEM86B
										TNFAIP8
										TNFAIP8L1
										TNFAIP8L2
										TNFAIP8L3
										TNFRSF21
										TPTE
										TPTE2
										TRIB3
										TSPO
										TSPOAP1
										TXNRD1
										UBE2I
										UGCG
										UGT1A9
										UGT8
										VAC14
										VAPA
										VAPB
										VDR

## Sheet: Additional file 4
symbol-driver	symbol-marker	symbol-suppressor
RPL8	PTGS2	SLC7A11
IREB2	CHAC1	GPX4
ATP5MC3	SLC40A1	AKR1C1
CS	TF	AKR1C2
EMC2	TFRC	AKR1C3
ACSF2	FTH1	GPX4
NOX1	GPX4	RB1
CYBB	HSPB1	HSPB1
NOX3	NFE2L2	HSF1
NOX4	GPX4	SLC7A11
NOX5	FTH1	GPX4
DUOX1		GCLC
DUOX2		SLC7A11
G6PD		NFE2L2
PGD		SQSTM1
VDAC2		NQO1
PIK3CA		HMOX1
FLT3		FTH1
SCP2		MUC1
TP53		SLC3A2
ACSL4		MT1G
LPCAT3		NFE2L2
NRAS		SLC40A1
KRAS		SLC7A11
HRAS		GPX4
TF		SLC7A11
TFRC		CISD1
TFR2		SLC7A11
SLC38A1		FANCD2
SLC1A5		GPX4
GLS2		NFE2L2
GOT1		FTMT
CARS1		HSPA5
TP53		ATF4
ALOX5		SLC7A11
KEAP1		GPX4
HMOX1		GPX4
TP53		HMOX1
TP53		ATF4
GLS2		NFE2L2
ATG5		TP53
ATG7		SLC7A11
NCOA4		HELLS
TF		SCD
ALOX5		FADS2
ALOX12		SRC
ALOX12B		STAT3
ALOX15		NFE2L2
ALOX15B		PML
ALOXE3		MTOR
PHKG2		NFS1
TFRC		TP63
ACO1		SLC7A11
IREB2		TP53
SLC38A1		CDKN1A
GLS2		MIR137
G6PDX		SLC40A1
ULK1		GPX4
ATG3		GPX4
ATG4D		ENPP2
ATG5		VDAC2
BECN1		FH
MAP1LC3A		CISD2
GABARAPL2		SLC40A1
GABARAPL1		MIR9-1
ATG16L1		MIR9-2
WIPI1		MIR9-3
WIPI2		CBS
SNX4		NFE2L2
ATG13		SQSTM1
ULK2		GPX4
NCOA4		ISCU
ACSL4		FTH1
TP53		ACSL3
SAT1		OTUB1
ALOX15		CD44
ACSL4		LINC00336
LPCAT3		STAT3
ALOX15		BRD4
ACSL4		PRDX6
KEAP1		MIR17
EGFR		SCD
NOX4		SESN2
MAPK3		NF2
MAPK1		ARNTL
BID		HIF1A
ACSL4		JUN
ZEB1		CA9
KEAP1		HSPA5
DPP4		TMBIM4
ALOX15		HSPA5
ALOX12		PLIN2
CDKN2A		MIR212
PEBP1		Fer1HCH
SOCS1		AIFM2
CDO1		AIFM2
MYB		LAMP2
HMOX1		ZFP36
MAPK8		GPX4
MAPK9		PROM2
MAPK1		CHMP5
MAPK3		CHMP6
SLC1A5		AKR1C1
CHAC1		AKR1C2
MAPK14		AKR1C3
LINC00472		CBS
NOX4		NFE2L2
GOT1		CAV1
BECN1		GCH1
PRKAA2		SIRT3
PRKAA1		DAZAP1
ELAVL1		PIR
BAP1		GCLC
TP53		FTL
ABCC1		HCAR1
ACSL4		SLC16A1
MIR6852		RRM2
ACVR1B		SCD
TGFBR1		NR4A1
BAP1		PIK3CA
EPAS1		RPTOR
HILPDA		SREBF1
HIF1A		SREBF2
ALOX12		FZD7
ACSL4		NFE2L2
HMOX1		NFE2L2
IFNG		P4HB
ANO6		NT5DC2
LPIN1		BCAT2
HMGB1		HSF1
TNFAIP3		PLA2G6
TLR4		MIR424
NOX4		PARK7
ATF3		FXN
ATM		SUV39H1
YY1AP1		ATF2
EGLN2		CDKN1A
MIOX		FTH1
TAFAZZIN		NFE2L2
MTDH		STAT3
IDH1		ACOT1
SIRT1		NFE2L2
TAFAZZIN		ALDH3A2
BECN1		NFE2L2
FBXW7		STK11
PANX1		FNDC5
DNAJB6		CircIL4R
BACH1		CDH1
ACSL4		NFE2L2
LONP1		MIR214
CD82		NEDD4L
IL1B		SQSTM1
CTSB		TF
POR		FTMT
CYB5R1		BRD2
ELOVL5		BRD3
FADS1		BRD4
ALOX12		BRDT
FBXW7		SCD
PTEN		SLC7A11
NR1D1		DECR1
NR1D2		NFE2L2
TBK1		GPX4
IL6		SLC7A11
USP7		NFE2L2
miR-182-5p		GLRX5
miR-378a-3p		GPX4
CTSB		NCOA3
ACSL4		NR5A2
ATF4		GPX4
BECN1		MTOR
AQP3		PANX2
AQP5		RHEBP1
AQP8		TFAP2A
LINC00618		CP
IREB2		SLC7A11
MT1DP		ARF6
ACSL4		GDF15
PEX10		ABHD12
KEAP1		PPP1R13L
AGPAT3		TFAM
PEX12		KDM3B
CHP1		RNF113A
GPAT4		PARK7
BRPF1		AHCY
OSBPL9		FXN
INTS2		circ-TTBK2
MMD		MIR522
CYP4F8		IDH2
MLLT1		PPARA
TTPA		NOS2
GRIA3		SIAH2
EPT1		RELA
POM121L12		PRKAA2
LIG3		VDR
AEBP2		NEDD4
AGPS		FXN
CDCA3		AIFM2
PEX2		PRDX1
LPCAT3		AR
PEX6		CBS
TIMM9		NFE2L2
DCAF7		CHMP5
LCE2C		CHMP6
FAR1		HMOX1
PHF21A		ZFP36
SMAD7		LAMP2
LYRM1		MTF1
AMN		COPZ1
PEX3		NUPR1
MTCH1		USP35
ZEB1		HSF1
SIRT1		PROM2
ACADSB		PLA2G6
PVT1		HIF1A
hsa_circ_0008367		NEAT1
SLC39A14		RRM2
NCOA4		SLC7A11
MAP3K11		FTMT
GSK3B		PARP1
MAPK8		PARP2
BRD7		PARP3
TP53		PARP4
SLC25A28		PARP6
ACSL4		PARP8
MFN2		PARP9
ACSL4		PARP10
SLC11A2		PARP11
ZFAS1		PARP12
SLC38A1		PARP14
TSC1		PARP15
PEBP1		PARP16
TGFB1		PDSS2
SNCA		TXN
SIRT3		SENP1
PRKAA2		PLA2G6
TFRC		OIP5-AS1
CGAS		MIR190A
STING1		FGF21
HDDC3		CREB1
MIR761		CREB3
MDM2		CREB5
MDM4		FTMT
ALOX15		GOT1
POR		TFRC
MIR214		GPX4
DLD		MIR130B
LONP1		BEX1
ACSL4		ASAH2
BACH1		SCD
DNAJB6		FABP4
WWTR1		AKT1S1
SIRT1		MLST8
ATM		MTOR
PRKCA		RPTOR
LGMN		CDH1
ACSL4		SIRT1
TP53		TYRO3
IFNG		SIRT6
SMPD1		TMSB4X
MYCN		TMSB4Y
SLC11A2		KIF20A
IFNA1		ECH1
IFNA2		circRHOT1
IFNA4		ETV4
IFNA5		MEG8
IFNA6		VCP
IFNA7		circ_0007142
IFNA8		ENPP2
IFNA10		RBMS1
IFNA13		KDM4A
IFNA14		CBS
IFNA16		MGST1
IFNA17		circKIF4A
IFNA21		miR-7-5p
SMG9		PRDX6
NR1D1		circ_0067934
ACSL4		MPC1
PPARG		CHMP1A
TLR4		CAMKK2
IL6		SOX2
MIR335		SRSF9
ATF3		PROK2
HMOX1		MIR4443
HMGB1		SIRT2
EPAS1		circRNA1615
SNX5		MIR27A
PAQR3		MIR670
MICU1		MEF2C
NOX4		NF2
TOR2A		CDH1
MIR375		HSPB1
MAP3K14		EZH2
SIRT3		PEDS1
CircKDM4C		SMPD1
MIR324		ADAMTS13
QSOX1		CDC25A
MIB2		G6PD
CLTRN		SRSF9
KLF2		CAV1
MIR5096		CircFNDC3B
TFRC		PPARD
HOTAIR		CISD2
H19		ENO3
FOXO4		SESN2
ELAVL1		LCN2
YTHDC2		MARCHF5
DDR2		TRIB2
SLC39A7		DHODH
TRIM46		SLC7A11
ACSL1		MIR545
KDM5A		OTUB1
TRIM21		PDK4
HMOX1		CircPVT1
DPEP1		MIR9-3HG
CYGB		ADIPOQ
IDO1		circDTL
GSTZ1		GPX4
TP53		mmu_circRNA_0000309
ACO1		IL6
GJA1		PTPN18
IREB2		FTH1
SLC7A11		FTH1
PGRMC1		FTL
CIRBP		LCN2
FAR1		ABCC5
circPSEN1		CISD3
USP11		MS4A15
STING1		LCN2
YAP1		FURIN
HMOX1		circRHBG
MIR135B		GALNT14
TRIM26		KLHDC3
YAP1		LINC01833
NDRG1		circGFRA1
MIR302A		MAPKAP1
ASMTL-AS1		MLST8
ZFAS1		MTOR
FADS2		PRR5
PIEZO1		RICTOR
LIFR		GSTM1
PTPN6		TERT
MIR15A		circ0097009
EGR1		TMEM161B-DT
ADAM23		circEPSTI1
ARHGEF26-AS1		MIR18A
ACSL4		RARRES2
CPEB1		USP11
COX4I2
lncRNA AABR07017145.1
TIMP1
MIR15A
KDM6B
NCOA4
GSK3B
IFNG
METTL14
CHAC1
MIB1
KDM5C
ACSL4
MEG3
CCDC6
ATF3
IREB2
CFL1
ALOXE3
MIR539
KMT2D

## Sheet: Additional file 5
GeneId in HADb	Gene
55626	AMBRA1
8542	APOL1
405	ARNT
410	ARSA
411	ARSB
468	ATF4
22926	ATF6
83734	ATG10
9140	ATG12
55054	ATG16L1
89849	ATG16L2
23130	ATG2A
55102	ATG2B
64422	ATG3
115201	ATG4A
23192	ATG4B
84938	ATG4C
84971	ATG4D
9474	ATG5
10533	ATG7
79065	ATG9A
285973	ATG9B
471	ATIC
573	BAG1
9531	BAG3
578	BAK1
581	BAX
596	BCL2
598	BCL2L1
8678	BECN1
637	BID
332	BIRC5
57448	BIRC6
662	BNIP1
664	BNIP3
665	BNIP3L
60673	C12orf44
23591	C17orf88
10241	CALCOCO2
10645	CAMKK2
821	CANX
823	CAPN1
11132	CAPN10
824	CAPN2
826	CAPNS1
834	CASP1
836	CASP3
837	CASP4
841	CASP8
6347	CCL2
729230	CCR2
4179	CD46
1026	CDKN1A
1027	CDKN1B
1029	CDKN2A
8837	CFLAR
25978	CHMP2B
128866	CHMP4B
1201	CLN3
1508	CTSB
1509	CTSD
1514	CTSL1
6376	CX3CL1
7852	CXCR4
1612	DAPK1
23604	DAPK2
1649	DDIT3
9077	DIRAS3
10395	DLC1
3337	DNAJB1
4189	DNAJB9
55332	DRAM1
9695	EDEM1
1938	EEF2
29904	EEF2K
1956	EGFR
5610	EIF2AK2
9451	EIF2AK3
1965	EIF2S1
1978	EIF4EBP1
1981	EIF4G1
2064	ERBB2
2081	ERN1
30001	ERO1L
8772	FADD
55578	FAM48A
355	FAS
2280	FKBP1A
2281	FKBP1B
2353	FOS
2308	FOXO1
2309	FOXO3
2548	GAA
11337	GABARAP
23710	GABARAPL1
11345	GABARAPL2
2597	GAPDH
2773	GNAI3
10399	GNB2L1
57120	GOPC
2894	GRID1
2895	GRID2
3065	HDAC1
10013	HDAC6
9146	HGS
3091	HIF1A
3326	HSP90AB1
3309	HSPA5
3312	HSPA8
26353	HSPB8
3458	IFNG
3551	IKBKB
9641	IKBKE
11009	IL24
345611	IRGM
3675	ITGA3
3655	ITGA6
3688	ITGB1
3691	ITGB4
3708	ITPR1
9711	KIAA0226
9776	KIAA0652
22863	KIAA0831
3799	KIF5B
54800	KLHL24
3916	LAMP1
3920	LAMP2
84557	MAP1LC3A
81631	MAP1LC3B
440738	MAP1LC3C
5609	MAP2K7
5594	MAPK1
5595	MAPK3
5599	MAPK8
9479	MAPK8IP1
5601	MAPK9
51360	MBTPS2
64223	MLST8
64419	MTMR14
2475	MTOR
4609	MYC
92345	NAF1
10135	NAMPT
4077	NBR1
10787	NCKAP1
4780	NFE2L2
4790	NFKB1
159296	NKX2-3
58484	NLRC4
4864	NPC1
3084	NRG1
9542	NRG2
10718	NRG3
5034	P4HB
5071	PARK2
142	PARP1
8682	PEA15
27043	PELP1
5195	PEX14
8504	PEX3
5289	PIK3C3
30849	PIK3R4
65018	PINK1
23645	PPP1R15A
5564	PRKAB1
5573	PRKAR1A
5580	PRKCD
5588	PRKCQ
5728	PTEN
5753	PTK6
8766	RAB11A
5861	RAB1A
53917	RAB24
83452	RAB33B
5868	RAB5A
7879	RAB7A
5879	RAC1
5894	RAF1
5925	RB1
9821	RB1CC1
5970	RELA
10287	RGS19
6009	RHEB
6198	RPS6KB1
57521	RPTOR
56681	SAR1A
5265	SERPINA1
83667	SESN2
51100	SH3GLB1
23411	SIRT1
22933	SIRT2
8877	SPHK1
83985	SPNS1
8878	SQSTM1
6767	ST13
6794	STK11
29110	TBK1
10548	TM9SF1
81671	TMEM49
157753	TMEM74
8743	TNFSF10
7157	TP53
58476	TP53INP2
8626	TP63
7161	TP73
7248	TSC1
7249	TSC2
286319	TUSC1
8408	ULK1
9706	ULK2
25989	ULK3
9100	USP10
7405	UVRAG
9341	VAMP3
6845	VAMP7
7422	VEGFA
23001	WDFY3
11152	WDR45
56270	WDR45L
55062	WIPI1
26100	WIPI2
53349	ZFYVE1

## Sheet: Additional file 6
LMRGs	FRGs	cor	pvalue	Regulation
SORL1	AR	0.543249	6.36854e-34	postive
SORL1	ACADSB	0.536886	4.9909e-33	postive
SORL1	ACSL1	0.579519	2.10505e-39	postive
SORL1	CP	0.52978	4.72765e-32	postive
SORL1	SCP2	0.628825	4.73731e-48	postive
ALDH1B1	CLTRN	0.548365	1.17769e-34	postive
MFSD2A	ACSL1	0.527008	1.11995e-31	postive
MFSD2A	CP	0.500879	2.6098e-28	postive
MFSD2A	GSTZ1	0.528839	6.3415e-32	postive
MFSD2A	SCP2	0.609903	1.49332e-44	postive
MFSD2A	MPC1	0.54563	2.91409e-34	postive
GPD1	ACSL1	0.634738	3.40449e-49	postive
GPD1	CLTRN	0.542674	7.68267e-34	postive
GPD1	GSTZ1	0.60456	1.31797e-43	postive
GPD1	SCP2	0.615217	1.64308e-45	postive
PGP	ZFAS1	0.612234	5.70058e-45	postive
PGP	HSPB1	0.768341	8.36087e-84	postive
PGP	RPL8	0.601666	4.21452e-43	postive
PGP	HRAS	0.784586	1.22714e-89	postive
LDLR	JUN	0.522181	4.93725e-31	postive
LDLR	ATF3	0.585227	2.49508e-40	postive
LDLR	ZFP36	0.58598	1.87701e-40	postive
PEMT	GSTZ1	0.603247	2.23635e-43	postive
SPHK1	ZFAS1	0.527932	8.41035e-32	postive
SPHK1	HSPB1	0.541446	1.1465e-33	postive
SPHK1	HRAS	0.546624	2.09873e-34	postive
PNPLA7	GSTZ1	0.502536	1.62817e-28	postive
THRSP	SCP2	0.51544	3.76802e-30	postive
AKR1C3	AKR1C3	1	0	postive
AKR1C3	NQO1	0.525584	1.73946e-31	postive
AKR1C3	AKR1C2	0.577354	4.67464e-39	postive
AKR1C3	PIR	0.569877	7.02757e-38	postive
BDH2	ACSL1	0.591779	2.04763e-41	postive
BDH2	CLTRN	0.648966	4.74049e-52	postive
BDH2	GSTZ1	0.589091	5.74986e-41	postive
BDH2	SCP2	0.557758	4.92225e-36	postive
ALDH2	FXN	0.61289	4.34216e-45	postive
ALDH2	AR	0.51439	5.14995e-30	postive
ALDH2	ACADSB	0.621533	1.12765e-46	postive
ALDH2	EZH2	-0.512857	8.11156e-30	negative
ALDH2	ACSL1	0.605952	7.50245e-44	postive
ALDH2	ADAMTS13	0.58844	7.37429e-41	postive
ALDH2	CLTRN	0.539799	1.95489e-33	postive
ALDH2	ABCC5	-0.557398	5.568e-36	negative
ALDH2	GSTZ1	0.730823	5.41499e-72	postive
ALDH2	SCP2	0.601416	4.65794e-43	postive
ALDH2	EGR1	0.519106	1.25466e-30	postive
ALDH2	DHODH	0.595813	4.26689e-42	postive
ALDH2	MPC1	0.558095	4.3836e-36	postive
ACSL1	SLC39A14	0.552957	2.52552e-35	postive
ACSL1	GCH1	0.551085	4.74445e-35	postive
ACSL1	ACADSB	0.619	3.32597e-46	postive
ACSL1	ACSL1	1	0	postive
ACSL1	ADAMTS13	0.546704	2.04359e-34	postive
ACSL1	CLTRN	0.553162	2.35696e-35	postive
ACSL1	CP	0.580138	1.67323e-39	postive
ACSL1	GSTZ1	0.626699	1.20434e-47	postive
ACSL1	SCP2	0.740771	6.34102e-75	postive
ACSL1	LIFR	0.515832	3.35146e-30	postive
ACSL1	EGR1	0.501506	2.18367e-28	postive
ACSL1	DHODH	0.509875	1.94967e-29	postive
ACSL1	MPC1	0.519842	1.00448e-30	postive
PIGU	CDC25A	0.511358	1.2618e-29	postive
PIGU	ZFAS1	0.710061	2.81091e-66	postive
PIGU	CDCA3	0.63485	3.23663e-49	postive
PIGU	HSPB1	0.569818	7.17792e-38	postive
PIGU	SMG9	0.514255	5.3596e-30	postive
PIGU	SCP2	-0.500994	2.52633e-28	negative
PIGU	ETV4	0.524457	2.46047e-31	postive
PIGU	RPL8	0.574184	1.48776e-38	postive
PIGU	HRAS	0.654735	2.97487e-53	postive
PON1	AR	0.532519	1.99976e-32	postive
PON1	ACSL1	0.524143	2.70913e-31	postive
PON1	ABCC5	-0.528557	6.92376e-32	negative
PON1	GSTZ1	0.649119	4.40829e-52	postive
PON1	SCP2	0.58065	1.38373e-39	postive
SLCO1B3	FXN	0.56475	4.33223e-37	postive
APOL6	ACSL1	0.555743	9.80944e-36	postive
APOL6	CP	0.516374	2.85069e-30	postive
APOL6	SCP2	0.582094	8.08304e-40	postive
ACAD11	ACADSB	0.514346	5.21786e-30	postive
ACAD11	ACSL1	0.508643	2.79399e-29	postive
ACAD11	SCP2	0.558912	3.30809e-36	postive
GLA	PIR	0.504999	8.03207e-29	postive
ACADS	ACADSB	0.572689	2.55684e-38	postive
ACADS	ACSL1	0.634484	3.81656e-49	postive
ACADS	ADAMTS13	0.596592	3.14401e-42	postive
ACADS	CLTRN	0.614933	1.8503e-45	postive
ACADS	GSTZ1	0.675081	1.03385e-57	postive
ACADS	SCP2	0.500354	3.02944e-28	postive
ACADS	DHODH	0.505913	6.17127e-29	postive
ACADS	MPC1	0.553436	2.14801e-35	postive
CYP1A2	FXN	0.516351	2.87005e-30	postive
CYP1A2	ACADSB	0.515274	3.95891e-30	postive
CYP1A2	ADAMTS13	0.520836	7.43252e-31	postive
CYP1A2	GSTZ1	0.557213	5.93337e-36	postive
CYP1A2	LIFR	0.524003	2.82855e-31	postive
GGT5	FABP4	0.559881	2.36734e-36	postive
ACAT1	SLC39A14	0.526652	1.25072e-31	postive
ACAT1	KIF20A	-0.514114	5.58972e-30	negative
ACAT1	ACADSB	0.507253	4.1866e-29	postive
ACAT1	EZH2	-0.511847	1.09265e-29	negative
ACAT1	ACSL1	0.617605	6.01037e-46	postive
ACAT1	ADAMTS13	0.534557	1.04889e-32	postive
ACAT1	CLTRN	0.50525	7.47136e-29	postive
ACAT1	ABCC5	-0.507374	4.04183e-29	negative
ACAT1	GSTZ1	0.635766	2.14124e-49	postive
ACAT1	SCP2	0.587999	8.72428e-41	postive
ACAT1	DHODH	0.62527	2.24493e-47	postive
ACAT1	MPC1	0.638677	5.7054e-50	postive
ACAA1	FXN	0.595095	5.64977e-42	postive
ACAA1	AR	0.543747	5.41007e-34	postive
ACAA1	ACADSB	0.639799	3.41386e-50	postive
ACAA1	ACSL1	0.673566	2.28512e-57	postive
ACAA1	ADAMTS13	0.569324	8.56408e-38	postive
ACAA1	CLTRN	0.525868	1.59363e-31	postive
ACAA1	GSTZ1	0.743899	7.11954e-76	postive
ACAA1	GABARAPL1	0.520463	8.32315e-31	postive
ACAA1	SCP2	0.653816	4.64343e-53	postive
ACAA1	EGR1	0.50303	1.4136e-28	postive
CYP8B1	FXN	0.525742	1.65651e-31	postive
CYP8B1	AR	0.644715	3.50849e-51	postive
CYP8B1	ACSL1	0.590776	3.01317e-41	postive
CYP8B1	GSTZ1	0.589528	4.86534e-41	postive
CYP8B1	GABARAPL1	0.507742	3.63197e-29	postive
CYP8B1	SCP2	0.722447	1.26529e-69	postive
SOCS3	ATF3	0.513963	5.84558e-30	postive
SOCS3	IL6	0.529739	4.78745e-32	postive
SOCS3	DHODH	0.614553	2.1697e-45	postive
SOCS3	ZFP36	0.766126	4.79584e-83	postive
ABCC1	ABCC1	1	0	postive
ABCC1	TFAP2A	0.516345	2.87541e-30	postive
ABCC1	SLC38A1	0.570601	5.42123e-38	postive
CYP3A4	FXN	0.528869	6.28259e-32	postive
CYP3A4	AR	0.584683	3.06314e-40	postive
MLYCD	FXN	0.53554	7.67125e-33	postive
MLYCD	AR	0.514311	5.27165e-30	postive
MLYCD	KIF20A	-0.50997	1.89619e-29	negative
MLYCD	ACADSB	0.618969	3.37041e-46	postive
MLYCD	EZH2	-0.560062	2.22411e-36	negative
MLYCD	ACSL1	0.652707	7.92698e-53	postive
MLYCD	ADAMTS13	0.532188	2.21943e-32	postive
MLYCD	GSTZ1	0.678719	1.51087e-58	postive
MLYCD	GABARAPL1	0.534243	1.15889e-32	postive
MLYCD	SCP2	0.617785	5.56911e-46	postive
MLYCD	DHODH	0.516643	2.6305e-30	postive
MLYCD	MPC1	0.527129	1.07899e-31	postive
ST3GAL6	FXN	0.61875	3.69857e-46	postive
ST3GAL6	AR	0.631105	1.72774e-48	postive
ST3GAL6	ACADSB	0.601557	4.402e-43	postive
ST3GAL6	ACSL1	0.580468	1.48045e-39	postive
ST3GAL6	GSTZ1	0.585052	2.66508e-40	postive
ST3GAL6	TTPA	0.500842	2.6376e-28	postive
ST3GAL6	GABARAPL1	0.568779	1.04023e-37	postive
ST3GAL6	SCP2	0.606677	5.58958e-44	postive
CYP4F2	AR	0.549609	7.77942e-35	postive
CYP4F2	ACADSB	0.508324	3.06624e-29	postive
CYP4F2	ACSL1	0.625826	1.76255e-47	postive
CYP4F2	CLTRN	0.509097	2.44781e-29	postive
CYP4F2	GSTZ1	0.625128	2.38795e-47	postive
CYP4F2	SCP2	0.655138	2.44656e-53	postive
CPS1	GCH1	0.540745	1.43953e-33	postive
CPS1	ACADSB	0.552951	2.53092e-35	postive
CPS1	GLS2	0.588703	6.66809e-41	postive
CPS1	GABARAPL1	0.523905	2.91463e-31	postive
GALR2	SMG9	0.852514	5.77776e-121	postive
ACAA2	FXN	0.515185	4.06494e-30	postive
ACAA2	ACADSB	0.541771	1.0314e-33	postive
ACAA2	ACSL1	0.643434	6.37316e-51	postive
ACAA2	GSTZ1	0.690574	2.35183e-61	postive
ACAA2	SCP2	0.640405	2.5846e-50	postive
APOC3	GSTZ1	0.624051	3.81018e-47	postive
CYP4A11	FXN	0.630128	2.66443e-48	postive
CYP4A11	AR	0.551004	4.87569e-35	postive
CYP4A11	ACADSB	0.698474	2.65272e-63	postive
CYP4A11	ACSL1	0.656311	1.38215e-53	postive
CYP4A11	ADAMTS13	0.687772	1.11476e-60	postive
CYP4A11	CLTRN	0.58438	3.433e-40	postive
CYP4A11	GSTZ1	0.676438	5.06316e-58	postive
CYP4A11	SCP2	0.600206	7.54308e-43	postive
CYP4A11	LIFR	0.559881	2.3678e-36	postive
CYP4A11	EGR1	0.612313	5.5169e-45	postive
CYP4A11	MPC1	0.562219	1.05127e-36	postive
CYP4A11	ZFP36	0.507572	3.81584e-29	postive
MMAA	FXN	0.572985	2.29718e-38	postive
MMAA	SLC39A14	0.506791	4.78576e-29	postive
MMAA	GCH1	0.510233	1.75581e-29	postive
MMAA	ACADSB	0.531743	2.55339e-32	postive
MMAA	EZH2	-0.536583	5.49863e-33	negative
MMAA	ACSL1	0.611809	6.7993e-45	postive
MMAA	ADAMTS13	0.519786	1.02171e-30	postive
MMAA	CDCA3	-0.542303	8.67102e-34	negative
MMAA	GSTZ1	0.565793	3.00021e-37	postive
MMAA	FANCD2	-0.536076	6.46552e-33	negative
MMAA	GABARAPL1	0.559301	2.89267e-36	postive
MMAA	SCP2	0.51027	1.73685e-29	postive
MMAA	LIFR	0.525014	2.07318e-31	postive
MMAA	DHODH	0.635564	2.34641e-49	postive
MMAA	RRM2	-0.518977	1.30433e-30	negative
MMAA	MPC1	0.566816	2.09007e-37	postive
ALB	ACADSB	0.642156	1.15294e-50	postive
ALB	ACSL1	0.639916	3.236e-50	postive
ALB	ADAMTS13	0.632431	9.57508e-49	postive
ALB	CLTRN	0.608865	2.28749e-44	postive
ALB	GSTZ1	0.597812	1.94548e-42	postive
ALB	SCP2	0.5069	4.63794e-29	postive
ALB	EGR1	0.594935	6.01404e-42	postive
ALB	MPC1	0.518667	1.43216e-30	postive
SGMS2	DHODH	0.512644	8.63894e-30	postive
SGMS2	ZFP36	0.595277	5.26212e-42	postive
ERLIN1	FXN	0.529884	4.57583e-32	postive
ERLIN1	SLC39A14	0.601776	4.03409e-43	postive
ERLIN1	ACADSB	0.577008	5.30699e-39	postive
ERLIN1	ACSL1	0.516997	2.36544e-30	postive
ERLIN1	ADAMTS13	0.562779	8.64651e-37	postive
ERLIN1	LIFR	0.550069	6.66996e-35	postive
EHHADH	FXN	0.516899	2.43589e-30	postive
EHHADH	AR	0.701911	3.6012e-64	postive
EHHADH	ACADSB	0.617757	5.63571e-46	postive
EHHADH	EZH2	-0.511711	1.13734e-29	negative
EHHADH	ACSL1	0.661665	9.86122e-55	postive
EHHADH	CLTRN	0.512805	8.23597e-30	postive
EHHADH	GSTZ1	0.61775	5.65184e-46	postive
EHHADH	TTPA	0.577457	4.50114e-39	postive
EHHADH	GABARAPL1	0.512294	9.57875e-30	postive
EHHADH	SCP2	0.764344	1.92757e-82	postive
ECHS1	FXN	0.614571	2.15373e-45	postive
ECHS1	GSTZ1	0.691279	1.58561e-61	postive
ECHS1	SCP2	0.514591	4.85137e-30	postive
LPL	FABP4	0.531861	2.46031e-32	postive
AKR1D1	ACADSB	0.513278	7.16152e-30	postive
AKR1D1	ACSL1	0.660649	1.63407e-54	postive
AKR1D1	CLTRN	0.510289	1.72697e-29	postive
AKR1D1	GSTZ1	0.570077	6.54364e-38	postive
AKR1D1	SCP2	0.6623	7.18451e-55	postive
MOGAT2	FXN	0.529232	5.60895e-32	postive
MOGAT2	AR	0.52772	8.9827e-32	postive
MOGAT2	ACADSB	0.50534	7.28098e-29	postive
MOGAT2	ACSL1	0.628209	6.21342e-48	postive
MOGAT2	ADAMTS13	0.52793	8.41407e-32	postive
MOGAT2	CLTRN	0.560683	1.79352e-36	postive
MOGAT2	GSTZ1	0.714248	2.17536e-67	postive
MOGAT2	SCP2	0.638935	5.07138e-50	postive
MOGAT2	EGR1	0.519138	1.24256e-30	postive
PLCB1	FANCD2	0.504942	8.16441e-29	postive
PIK3C2G	ACSL1	0.511101	1.36095e-29	postive
PIK3C2G	CP	0.514804	4.55351e-30	postive
CETP	ADAMTS13	0.559031	3.17566e-36	postive
CETP	TLR4	0.566023	2.76607e-37	postive
CETP	LIFR	0.555758	9.75938e-36	postive
MTTP	AR	0.598714	1.363e-42	postive
MTTP	ACADSB	0.521271	6.51345e-31	postive
MTTP	ACSL1	0.598875	1.2787e-42	postive
MTTP	GSTZ1	0.527455	9.7502e-32	postive
MTTP	SCP2	0.665149	1.71849e-55	postive
SULT2A1	SCP2	0.536052	6.51579e-33	postive
ABCA8	ACADSB	0.512448	9.15225e-30	postive
ABCA8	GABARAPL1	0.51042	1.6621e-29	postive
HMGCL	FXN	0.596144	3.74878e-42	postive
HMGCL	ACADSB	0.518546	1.48543e-30	postive
HMGCL	ACSL1	0.530374	3.92482e-32	postive
HMGCL	ADAMTS13	0.502713	1.54747e-28	postive
HMGCL	CLTRN	0.526593	1.27347e-31	postive
HMGCL	GSTZ1	0.720867	3.46027e-69	postive
HMGCL	DHODH	0.540416	1.60128e-33	postive
HMGCL	MPC1	0.536431	5.77376e-33	postive
ALAS1	FXN	0.505015	7.99452e-29	postive
ALAS1	AR	0.554462	1.5169e-35	postive
EPHX2	SLC39A14	0.602749	2.73163e-43	postive
EPHX2	AR	0.518536	1.48975e-30	postive
EPHX2	ACADSB	0.62141	1.18874e-46	postive
EPHX2	ACSL1	0.630536	2.2247e-48	postive
EPHX2	ADAMTS13	0.525272	1.91505e-31	postive
EPHX2	CLTRN	0.551241	4.50329e-35	postive
EPHX2	GSTZ1	0.649513	3.65436e-52	postive
EPHX2	SCP2	0.693392	4.82867e-62	postive
SLC27A2	GCH1	0.528625	6.77809e-32	postive
SLC27A2	ACSL1	0.62619	1.50406e-47	postive
SLC27A2	GSTZ1	0.552434	3.0132e-35	postive
SLC27A2	SCP2	0.584772	2.96226e-40	postive
SLC27A2	MPC1	0.551927	3.57457e-35	postive
ANGPTL3	ACADSB	0.536489	5.66642e-33	postive
ANGPTL3	MPC1	0.512164	9.95127e-30	postive
CYP39A1	FXN	0.509423	2.22517e-29	postive
CYP39A1	AR	0.513101	7.54734e-30	postive
CYP39A1	ACADSB	0.671984	5.20224e-57	postive
CYP39A1	ACSL1	0.618235	4.60312e-46	postive
CYP39A1	ADAMTS13	0.597645	2.07838e-42	postive
CYP39A1	CLTRN	0.588336	7.67063e-41	postive
CYP39A1	GSTZ1	0.694268	2.94123e-62	postive
CYP39A1	SCP2	0.647453	9.69905e-52	postive
CYP39A1	LIFR	0.55672	7.02455e-36	postive
CYP39A1	EGR1	0.539656	2.04746e-33	postive
CYP39A1	MPC1	0.517439	2.07212e-30	postive
AKR1C2	AKR1C3	0.577354	4.67464e-39	postive
AKR1C2	AKR1C2	1	0	postive
AKR1C2	PIR	0.583038	5.68139e-40	postive
NCOR1	ADAMTS13	0.511646	1.15941e-29	postive
NCOR1	LIFR	0.521383	6.29567e-31	postive
ALOX15	ALOX15	1	0	postive
SLCO1B1	ACADSB	0.669005	2.41709e-56	postive
SLCO1B1	ACSL1	0.558195	4.23536e-36	postive
SLCO1B1	SCP2	0.51448	5.01352e-30	postive
ACSL4	ACSL4	1	0	postive
TXNRD1	AKR1C3	0.512306	9.54496e-30	postive
TXNRD1	SQSTM1	0.648424	6.12853e-52	postive
TXNRD1	PIR	0.597078	2.59755e-42	postive
SRD5A1	ACSL1	0.520574	8.04866e-31	postive
SRD5A1	GSTZ1	0.535126	8.75414e-33	postive
SRD5A1	SCP2	0.661511	1.06502e-54	postive
CAT	AR	0.578988	2.56077e-39	postive
CAT	ACADSB	0.67003	1.42756e-56	postive
CAT	ACSL1	0.747815	4.40351e-77	postive
CAT	ADAMTS13	0.536057	6.50545e-33	postive
CAT	CLTRN	0.634532	3.73484e-49	postive
CAT	GSTZ1	0.682986	1.52783e-59	postive
CAT	GLS2	0.511312	1.27893e-29	postive
CAT	SCP2	0.780008	6.069e-88	postive
CPT2	FXN	0.506057	5.91834e-29	postive
CPT2	AR	0.545033	3.54653e-34	postive
CPT2	ACSL1	0.639173	4.54895e-50	postive
CPT2	GSTZ1	0.574938	1.1307e-38	postive
CPT2	GABARAPL1	0.521557	5.97081e-31	postive
CPT2	SCP2	0.667836	4.39481e-56	postive
CBR4	ACADSB	0.595259	5.29995e-42	postive
CBR4	EZH2	-0.507625	3.75801e-29	negative
CBR4	ACSL1	0.664885	1.96332e-55	postive
CBR4	CLTRN	0.589794	4.39343e-41	postive
CBR4	GSTZ1	0.606843	5.22402e-44	postive
CBR4	SCP2	0.636459	1.5649e-49	postive
CBR4	MPC1	0.517866	1.82241e-30	postive
SCP2	SLC39A14	0.514338	5.23056e-30	postive
SCP2	AR	0.612778	4.54781e-45	postive
SCP2	ACADSB	0.561206	1.49579e-36	postive
SCP2	ACSL1	0.740771	6.34102e-75	postive
SCP2	CP	0.57522	1.02055e-38	postive
SCP2	GSTZ1	0.617293	6.85758e-46	postive
SCP2	SCP2	1	0	postive
PTGS2	IL6	0.526114	1.47699e-31	postive
PTGS2	IL1B	0.537614	3.95272e-33	postive
PTGS2	PTGS2	1	0	postive
PTGS2	EGR1	0.502865	1.48184e-28	postive
PTGS2	ZFP36	0.56564	3.16669e-37	postive
PLA2G6	PLA2G6	1	0	postive
MED22	CDC25A	0.525077	2.03356e-31	postive
MED22	CDCA3	0.548297	1.20489e-34	postive
MED22	SMG9	0.558072	4.41869e-36	postive
MED22	SCP2	-0.522802	4.08528e-31	negative
ACSM3	SLC39A14	0.525447	1.81461e-31	postive
ACSM3	ACADSB	0.625736	1.83287e-47	postive
ACSM3	ACSL1	0.65898	3.73152e-54	postive
ACSM3	ADAMTS13	0.550285	6.20537e-35	postive
ACSM3	CLTRN	0.568097	1.32641e-37	postive
ACSM3	GSTZ1	0.595248	5.32244e-42	postive
ACSM3	SCP2	0.560835	1.7015e-36	postive
ACSM3	LIFR	0.536352	5.92053e-33	postive
FABP4	HCAR1	0.613089	3.99624e-45	postive
FABP4	FABP4	1	0	postive
FABP5	KIF20A	0.521129	6.79961e-31	postive
FABP5	ABCC5	0.515621	3.56999e-30	postive
FABP5	NT5DC2	0.522817	4.06649e-31	postive
PON3	ACADSB	0.583084	5.58281e-40	postive
PON3	ACSL1	0.513487	6.7315e-30	postive
PON3	ADAMTS13	0.506465	5.26031e-29	postive
PON3	ABCC5	-0.507743	3.63156e-29	negative
PON3	GSTZ1	0.649829	3.14446e-52	postive
RGN	ACADSB	0.538839	2.6654e-33	postive
ACOX2	AR	0.591891	1.96028e-41	postive
ACOX2	ACADSB	0.551291	4.42845e-35	postive
ACOX2	ACSL1	0.56703	1.93741e-37	postive
ACOX2	GSTZ1	0.615881	1.24332e-45	postive
ACOX2	SCP2	0.698731	2.28682e-63	postive
TH	SMG9	0.504273	9.89752e-29	postive
STARD5	AR	0.509758	2.01745e-29	postive
STARD5	ACSL1	0.567489	1.6464e-37	postive
STARD5	TTPA	0.506219	5.64791e-29	postive
STARD5	SCP2	0.590648	3.16503e-41	postive
TNXB	LIFR	0.539697	2.02075e-33	postive
LIPG	ACSL1	0.528563	6.91059e-32	postive
LIPG	SCP2	0.609021	2.14594e-44	postive
HSD17B13	ACSL1	0.602363	3.1887e-43	postive
HSD17B13	GSTZ1	0.565708	3.09212e-37	postive
HSD17B13	SCP2	0.669726	1.66945e-56	postive
PTGIS	AQP5	0.529082	5.87838e-32	postive
PTGIS	PTGS2	0.611374	8.14024e-45	postive
SOCS2	GCH1	0.51089	1.4479e-29	postive
SOCS2	ACADSB	0.501413	2.2423e-28	postive
SOCS2	ACSL1	0.535728	7.22506e-33	postive
SOCS2	ADAMTS13	0.551176	4.60137e-35	postive
SOCS2	GSTZ1	0.509063	2.47212e-29	postive
SOCS2	LIFR	0.515245	3.99338e-30	postive
SOCS2	MPC1	0.507003	4.50065e-29	postive
SOCS2	ZFP36	0.569025	9.52837e-38	postive
PLPPR1	PRKAA2	0.602858	2.61483e-43	postive
GC	ACADSB	0.548368	1.17643e-34	postive
GC	ACSL1	0.620017	2.15674e-46	postive
GC	ADAMTS13	0.514585	4.85919e-30	postive
GC	GSTZ1	0.533647	1.40007e-32	postive
GC	MPC1	0.529833	4.64913e-32	postive
SRD5A2	ACSL1	0.507755	3.618e-29	postive
SRD5A2	GSTZ1	0.515913	3.27184e-30	postive
SRD5A2	SCP2	0.568964	9.73994e-38	postive
SLC10A1	GSTZ1	0.601005	5.48657e-43	postive
SLC10A1	SCP2	0.659276	3.22362e-54	postive
APOA5	FXN	0.50053	2.88189e-28	postive
APOA5	ACSL1	0.516043	3.14719e-30	postive
APOA5	GSTZ1	0.569349	8.48721e-38	postive
APOA5	SCP2	0.530428	3.85897e-32	postive
CYP2C8	FXN	0.576052	7.53021e-39	postive
CYP2C8	SLC39A14	0.502425	1.68026e-28	postive
CYP2C8	AR	0.508125	3.24941e-29	postive
CYP2C8	ACADSB	0.648903	4.88288e-52	postive
CYP2C8	ACSL1	0.690641	2.2657e-61	postive
CYP2C8	ADAMTS13	0.698152	3.19529e-63	postive
CYP2C8	CLTRN	0.632963	7.54937e-49	postive
CYP2C8	GSTZ1	0.690981	1.87317e-61	postive
CYP2C8	SCP2	0.631889	1.21913e-48	postive
CYP2C8	LIFR	0.61467	2.0661e-45	postive
CYP2C8	EGR1	0.557149	6.06593e-36	postive
CYP2C8	MPC1	0.577222	4.90621e-39	postive
CYP2C8	ZFP36	0.506533	5.15839e-29	postive
NAAA	ACADSB	0.623941	3.99684e-47	postive
NAAA	ACSL1	0.533213	1.60616e-32	postive
NAAA	ADAMTS13	0.586694	1.43225e-40	postive
NAAA	CLTRN	0.533858	1.3095e-32	postive
NAAA	GSTZ1	0.522823	4.05841e-31	postive
NAAA	LIFR	0.550204	6.37598e-35	postive
NAAA	MPC1	0.540453	1.58239e-33	postive
ST3GAL3	ASMTL-AS1	0.518354	1.57374e-30	postive
PCK2	AR	0.512078	1.02068e-29	postive
PCK2	ACADSB	0.552751	2.70768e-35	postive
PCK2	ACSL1	0.62831	5.94199e-48	postive
PCK2	ABCC5	-0.53688	5.00027e-33	negative
PCK2	GSTZ1	0.695975	1.11371e-62	postive
PCK2	SCP2	0.635086	2.91054e-49	postive
HAO2	ACSL1	0.666414	9.05793e-56	postive
HAO2	ADAMTS13	0.53982	1.94189e-33	postive
HAO2	CLTRN	0.609608	1.68636e-44	postive
HAO2	GSTZ1	0.638133	7.31219e-50	postive
HAO2	SCP2	0.620902	1.47757e-46	postive
ACADL	AR	0.613068	4.0321e-45	postive
ACADL	ACSL1	0.619225	3.02275e-46	postive
ACADL	GSTZ1	0.521164	6.72755e-31	postive
ACADL	SCP2	0.671386	7.09166e-57	postive
CYP2C9	AR	0.543267	6.3311e-34	postive
CYP2C9	ACADSB	0.601246	4.98474e-43	postive
CYP2C9	ACSL1	0.556124	8.6131e-36	postive
CYP2C9	ADAMTS13	0.527049	1.10597e-31	postive
CYP2C9	GSTZ1	0.519892	9.89462e-31	postive
CYP2C9	TTPA	0.518394	1.555e-30	postive
CYP2C9	SCP2	0.55677	6.90548e-36	postive
ALOX15B	ALOX15B	1	0	postive
SLC27A5	FXN	0.569969	6.80101e-38	postive
SLC27A5	AR	0.564542	4.66167e-37	postive
SLC27A5	ABCC5	-0.50158	2.13854e-28	negative
SLC27A5	GSTZ1	0.724102	4.37431e-70	postive
SLC27A5	SCP2	0.509399	2.24104e-29	postive
ST8SIA6	ACADSB	0.530905	3.32337e-32	postive
ST8SIA6	ADAMTS13	0.675922	6.64392e-58	postive
ST8SIA6	TLR4	0.575844	8.12735e-39	postive
ST8SIA6	LIFR	0.817682	2.94485e-103	postive
ST8SIA6	EGR1	0.560141	2.16417e-36	postive
ACACB	ACSL1	0.678552	1.65141e-58	postive
ACACB	SCP2	0.594473	7.20207e-42	postive
ACOT2	ACSL1	0.509368	2.26151e-29	postive
ACOT2	GSTZ1	0.526152	1.45945e-31	postive
PRKAA2	PRKAA2	1	0	postive
GPAA1	HSPB1	0.630286	2.4852e-48	postive
GPAA1	RPL8	0.727981	3.52521e-71	postive
GPAA1	HRAS	0.500523	2.8879e-28	postive
LCAT	FXN	0.59664	3.08526e-42	postive
LCAT	SLC39A14	0.504307	9.80179e-29	postive
LCAT	ACADSB	0.586169	1.74772e-40	postive
LCAT	ACSL1	0.62982	3.05436e-48	postive
LCAT	ADAMTS13	0.683136	1.40824e-59	postive
LCAT	CLTRN	0.58702	1.26563e-40	postive
LCAT	GSTZ1	0.754007	4.85372e-79	postive
LCAT	SCP2	0.555046	1.24394e-35	postive
LCAT	LIFR	0.526497	1.31195e-31	postive
LCAT	EGR1	0.562624	9.12585e-37	postive
LCAT	DHODH	0.594835	6.25297e-42	postive
LCAT	MPC1	0.604698	1.24662e-43	postive
LCAT	ZFP36	0.507172	4.28568e-29	postive
AQP8	AQP8	1	0	postive
PLIN2	PLIN2	1	0	postive
PLIN2	ZFP36	0.506959	4.55935e-29	postive
CYP2J2	FXN	0.510174	1.78614e-29	postive
CYP2J2	AR	0.507264	4.173e-29	postive
CYP2J2	GSTZ1	0.575946	7.82767e-39	postive
CYP2J2	SCP2	0.596899	2.78687e-42	postive
CYP4A22	FXN	0.565955	2.83357e-37	postive
CYP4A22	AR	0.530835	3.39665e-32	postive
CYP4A22	ACADSB	0.606267	6.60275e-44	postive
CYP4A22	ACSL1	0.636335	1.6554e-49	postive
CYP4A22	ADAMTS13	0.586581	1.49539e-40	postive
CYP4A22	CLTRN	0.563178	7.52118e-37	postive
CYP4A22	GSTZ1	0.70935	4.32225e-66	postive
CYP4A22	SCP2	0.638562	6.0133e-50	postive
CYP4A22	EGR1	0.53899	2.53857e-33	postive
CHKB	EGLN2	0.545235	3.31898e-34	postive
PCK1	SLC39A14	0.514344	5.2206e-30	postive
PCK1	GCH1	0.576207	7.11667e-39	postive
PCK1	ACADSB	0.551574	4.0258e-35	postive
PCK1	ACSL1	0.558987	3.22419e-36	postive
PCK1	ADAMTS13	0.526985	1.1282e-31	postive
PCK1	GSTZ1	0.569585	7.80072e-38	postive
PCK1	GABARAPL1	0.546897	1.91741e-34	postive
PCK1	SCP2	0.585775	2.02846e-40	postive
PCK1	MPC1	0.584072	3.8549e-40	postive
ACADM	SLC39A14	0.545018	3.56389e-34	postive
ACADM	AR	0.538933	2.58609e-33	postive
ACADM	ACADSB	0.668868	2.59304e-56	postive
ACADM	ACSL1	0.677256	3.28525e-58	postive
ACADM	CP	0.54835	1.18372e-34	postive
ACADM	GSTZ1	0.536033	6.55481e-33	postive
ACADM	SCP2	0.740486	7.72873e-75	postive
ACADM	LIFR	0.512204	9.83702e-30	postive
PLPP3	SLC39A14	0.632368	9.8489e-49	postive
PLPP3	GCH1	0.531732	2.56226e-32	postive
PLPP3	ACADSB	0.608251	2.94176e-44	postive
PLPP3	ACSL1	0.676088	6.08749e-58	postive
PLPP3	ADAMTS13	0.596827	2.86698e-42	postive
PLPP3	CLTRN	0.507022	4.47697e-29	postive
PLPP3	CP	0.558605	3.67768e-36	postive
PLPP3	GSTZ1	0.517845	1.83444e-30	postive
PLPP3	GABARAPL1	0.535808	7.04343e-33	postive
PLPP3	TLR4	0.524645	2.32223e-31	postive
PLPP3	SCP2	0.660329	1.91532e-54	postive
PLPP3	LIFR	0.608022	3.22948e-44	postive
PLPP3	DHODH	0.584669	3.07852e-40	postive
PLPP3	ZFP36	0.606453	6.12224e-44	postive
GBA3	ACADSB	0.560823	1.70861e-36	postive
GBA3	ACSL1	0.712875	5.05896e-67	postive
GBA3	ADAMTS13	0.551387	4.28731e-35	postive
GBA3	CLTRN	0.665143	1.72364e-55	postive
GBA3	GSTZ1	0.666722	7.74871e-56	postive
GBA3	SCP2	0.670389	1.18678e-56	postive
HMGCS2	ACADSB	0.56781	1.46899e-37	postive
HMGCS2	ACSL1	0.568431	1.17782e-37	postive
HMGCS2	SCP2	0.56525	3.63313e-37	postive

## Sheet: Additional file 7
LMRGs	ARGs	cor	pvalue	Regulation
SORL1	DIRAS3	0.52607	1.49698e-31	postive
PGP	SPHK1	0.60739	4.18123e-44	postive
PGP	BIRC5	0.596465	3.30524e-42	postive
LDLR	NAMPT	0.504421	9.48552e-29	postive
SPHK1	SPHK1	1	0	postive
SPHK1	BIRC5	0.573487	1.91533e-38	postive
SPHK1	IKBKE	0.504608	8.98928e-29	postive
ALDH2	DIRAS3	0.565087	3.8479e-37	postive
ALDH2	FOXO1	0.50788	3.48918e-29	postive
ALDH2	FOS	0.501131	2.42997e-28	postive
ACSL1	DIRAS3	0.577547	4.35447e-39	postive
ACSL1	FOXO1	0.580929	1.24768e-39	postive
PIGU	BIRC5	0.614842	1.92267e-45	postive
ACAT1	FOXO1	0.551513	4.10912e-35	postive
ACAA1	GABARAPL1	0.520463	8.32315e-31	postive
ACAA1	DIRAS3	0.521589	5.91203e-31	postive
CYP8B1	GABARAPL1	0.507742	3.63197e-29	postive
CYP8B1	BAK1	-0.506028	5.96816e-29	negative
SOCS3	NAMPT	0.621059	1.38192e-46	postive
ABCC1	ITGB4	0.520482	8.27526e-31	postive
MLYCD	GABARAPL1	0.534243	1.15889e-32	postive
ST3GAL6	GABARAPL1	0.568779	1.04023e-37	postive
ST3GAL6	FOXO1	0.555148	1.20146e-35	postive
CYP4F2	DIRAS3	0.531208	3.02196e-32	postive
CPS1	GABARAPL1	0.523905	2.91463e-31	postive
GALR2	DAPK2	0.53072	3.5219e-32	postive
SMARCD3	BAK1	0.527229	1.04589e-31	postive
CYP4A11	DIRAS3	0.597985	1.81742e-42	postive
CYP4A11	FOXO1	0.544803	3.82584e-34	postive
CYP4A11	FOS	0.579217	2.35332e-39	postive
MMAA	GABARAPL1	0.559301	2.89267e-36	postive
MMAA	FOXO1	0.521475	6.12096e-31	postive
ALB	DIRAS3	0.541019	1.31685e-33	postive
ALB	FOS	0.550989	4.89987e-35	postive
ST6GALNAC4	IKBKE	0.503232	1.33405e-28	postive
SGMS2	NAMPT	0.657193	8.97911e-54	postive
ERLIN1	DLC1	0.55497	1.27619e-35	postive
ERLIN1	FOXO1	0.516429	2.80406e-30	postive
EHHADH	GABARAPL1	0.512294	9.57875e-30	postive
EHHADH	IKBKE	-0.54851	1.12214e-34	negative
EHHADH	BAK1	-0.56155	1.32715e-36	negative
AKR1D1	DIRAS3	0.592202	1.73846e-41	postive
MOGAT2	DIRAS3	0.582081	8.12406e-40	postive
CPT1B	SPNS1	0.510799	1.48732e-29	postive
ABCA8	GABARAPL1	0.51042	1.6621e-29	postive
ALAS1	FOXO1	0.511939	1.06346e-29	postive
EPHX2	DIRAS3	0.542059	9.38983e-34	postive
EPHX2	FOXO1	0.501499	2.18837e-28	postive
SLC27A2	FOXO1	0.535209	8.52464e-33	postive
CYP39A1	DIRAS3	0.572421	2.81648e-38	postive
CYP39A1	FOS	0.530545	3.72066e-32	postive
NCOR1	DLC1	0.50314	1.36962e-28	postive
TXNRD1	SQSTM1	0.648424	6.12853e-52	postive
CAT	DIRAS3	0.58298	5.80565e-40	postive
CAT	FOXO1	0.534493	1.07062e-32	postive
CAT	BAK1	-0.522797	4.09159e-31	negative
CPT2	GABARAPL1	0.521557	5.97081e-31	postive
CBR4	DIRAS3	0.500927	2.57452e-28	postive
SCP2	DIRAS3	0.527049	1.10586e-31	postive
SCP2	FOXO1	0.533576	1.43162e-32	postive
PTGS2	FOS	0.598029	1.7865e-42	postive
MED22	IKBKE	0.502926	1.4562e-28	postive
MED22	BAK1	0.503654	1.1821e-28	postive
ACSM3	DIRAS3	0.524633	2.33053e-31	postive
FABP5	BIRC5	0.509383	2.2516e-29	postive
ACOX2	BAK1	-0.509363	2.26444e-29	negative
AACS	BAK1	0.527173	1.06427e-31	postive
SOCS2	FOXO1	0.784166	1.76231e-89	postive
SOCS2	NAMPT	0.502789	1.5146e-28	postive
PLPPR1	ITGA6	0.566981	1.97151e-37	postive
CYP2C8	DIRAS3	0.615081	1.73936e-45	postive
CYP2C8	FOXO1	0.535109	8.80101e-33	postive
CYP2C8	FOS	0.538295	3.17541e-33	postive
PCK2	DIRAS3	0.505115	7.76811e-29	postive
PCK2	BAK1	-0.522623	4.31393e-31	negative
HAO2	DIRAS3	0.622515	7.39498e-47	postive
ACADL	DIRAS3	0.50713	4.33859e-29	postive
CYP2C9	DIRAS3	0.513273	7.17203e-30	postive
ST8SIA6	DLC1	0.556606	7.30381e-36	postive
ST8SIA6	FOS	0.522967	3.88448e-31	postive
ACACB	HSP90AB1	-0.521244	6.56766e-31	negative
PRKAA2	ITGA6	0.600177	7.6284e-43	postive
AVIL	ITGA6	0.580303	1.57434e-39	postive
LCAT	DIRAS3	0.630845	1.93991e-48	postive
LCAT	FOXO1	0.513518	6.66959e-30	postive
LCAT	FOS	0.541726	1.04665e-33	postive
CYP4A22	DIRAS3	0.558372	3.98527e-36	postive
CYP4A22	FOXO1	0.508534	2.88442e-29	postive
CISH	FOXO1	0.525706	1.67506e-31	postive
PCK1	GABARAPL1	0.546897	1.91741e-34	postive
PCK1	DIRAS3	0.506311	5.4999e-29	postive
PCK1	FOXO1	0.538078	3.40461e-33	postive
PCK1	FOS	0.541911	9.85511e-34	postive
ITPKA	BIRC5	0.533186	1.61968e-32	postive
PLPP3	DLC1	0.596936	2.74643e-42	postive
PLPP3	NRG1	0.5006	2.82524e-28	postive
PLPP3	GABARAPL1	0.535808	7.04343e-33	postive
PLPP3	DIRAS3	0.55048	5.81316e-35	postive
PLPP3	FOXO1	0.711954	8.88782e-67	postive
PLPP3	NAMPT	0.659526	2.85055e-54	postive
GBA3	DIRAS3	0.631413	1.50689e-48	postive
